# Supplementary material
Source: PubMed Central journal article supplement (PMC2586001)

## Supporting Information for:

**Phosphine-Catalyzed [4+2] Annulation: Synthesis of Cyclohexenes**

Yang S. Tran and Ohyun Kwon\*

*Department of Chemistry and Biochemistry, University of California, Los Angeles, California 90095-1569***Contents**

|                                                                                                                     |     |
|---------------------------------------------------------------------------------------------------------------------|-----|
| 1. General Information .....                                                                                        | S2  |
| 2. General Procedure for the Formation of Cyclohexenes <b>3/4</b> .....                                             | S3  |
| 3. Structural Assignment of Cyclohexenes <b>3a</b> and <b>4a</b> Through 1D and 2D NMR Spectroscopic Analyses ..... | S4  |
| A. 1D and 2D NMR Spectra of Cyclohexene <b>3a</b> .....                                                             | S4  |
| B. 1D and 2D NMR Spectra of Cyclohexene <b>4a</b> .....                                                             | S8  |
| 4. Characterization of Tetrasubstituted Cyclohexene Derivatives <b>3</b> and <b>4</b> .....                         | S11 |
| 5. Characterization of Pentasubstituted Cyclohexene Derivatives <b>3</b> .....                                      | S14 |
| 6. Synthesis of Tetracycle <b>12</b> .....                                                                          | S21 |
| 7. <sup>1</sup> H and <sup>13</sup> C NMR Spectra of Products.....                                                  | S22 |
| 8. ORTEP Representations of the Solid State Structures of Compounds <b>3d</b> , <b>4f</b> , and <b>12</b> ... S47   |     |
| A. Cyclohexene <b>3d</b> .....                                                                                      | S47 |
| B. Cyclohexene <b>4f</b> .....                                                                                      | S48 |
| C. Tetracycle <b>12</b> .....                                                                                       | S48 |

## 1. General Information

All reactions were performed under an argon atmosphere with dry solvents and anhydrous conditions, unless otherwise noted. Benzene, toluene, and dichloromethane were distilled afresh from CaH<sub>2</sub>. All other reagents were used as received from commercial sources. All ethyl 2-substitutedmethylallenoates **1** were synthesized according to procedures reported previously.<sup>1</sup> The arylidenemalononitriles **2** were obtained from commercially available sources or synthesized through phosphine-catalyzed Knoevenagel condensation of the pertinent aldehyde and malononitrile, according to the procedure reported by Yadav.<sup>2</sup> Reactions were monitored using thin layer chromatography (TLC) performed on 0.25-mm E. Merck silica gel plates (60F-254) and visualized under UV light or through permanganate staining. Flash column chromatography was performed using E. Merck silica gel 60 (230–400 mesh) and compressed air. IR spectra were recorded on a Perkin–Elmer pargon 1600 FT-IR spectrometer. NMR spectra were obtained on Bruker Avance-500, ARX-500, or Bruker Avance-300 instruments (as indicated), calibrated using residual undeuterated chloroform as an internal reference (7.26 and 77.0 ppm for <sup>1</sup>H and <sup>13</sup>C NMR spectra, respectively). <sup>1</sup>H NMR spectral data are reported as follows: chemical shift (δ, ppm), multiplicity, coupling constant (Hz), and integration. <sup>13</sup>C spectral data are reported in terms of the chemical shift. The following abbreviations are used to indicate multiplicities: s = singlet; d = doublet; t = triplet; q = quartet; m = multiplet; br = broad. High-resolution EI mass spectra were recorded after rapid thermal vaporization of samples deposited on a desorption ionization filament inserted directly into the electron ionization (EI, 70 eV, 200 °C) source of a triple-sector high-resolution instrument (VG/Micromass Autospec) tuned to 8000 static resolution (M/DM, 10% valley) using perfluorinated kerosene (formula

<sup>1</sup> Zhu, X.-F.; Lan, J.; Kwon, O. *J. Am. Chem. Soc.* **2003**, *125*, 4716.

<sup>2</sup> Yadav, J. S.; Subba Reddy, B. V.; Basak, A. K.; Visali, B.; Narsaiah, A. V.; Nagaiah, K. *Eur. J. Org. Chem.* **2004**, 546.

weight 705, Lancaster Synthesis, Inc., NH) as the internal calibrant. High-resolution electrospray ionization (HRESI) mass spectra were recorded after flow injection of chloroform solutions into an ESI source attached to a 7.5-tesla FTMS (Ion Spec Ultima, Irvine, CA) instrument. Data were analyzed using the instrument-supplied software. X-ray crystallographic data were collected using a Bruker SMART CCD-based diffractometer equipped with a low-temperature apparatus operated at 100 K. Melting points (m.p.) are uncorrected and were recorded on an Electrothermal capillary melting point apparatus.

## 2. General Procedure for the Formation of Cyclohexenes 3/4

Ethyl 2-alkylallenoate **1** (1.2 mmol) in benzene (10 mL) was added slowly over 3 h via syringe under an argon atmosphere to a solution of arylidenemalononitrile **2** (1.0 mmol) and phosphine (0.2 mmol) in benzene (10 mL) at 80 °C. The mixture was heated under reflux and the progress of the reaction monitored using TLC. After 8 h, additional ethyl 2-alkylallenoate (0.2 mmol) in benzene (2 mL) was added over 5 min if it is necessary. After the reaction had reached completion [ca. 14 h, except for the reaction using (4-ClC<sub>6</sub>H<sub>4</sub>)<sub>3</sub>P, which required 120 h], the resulting mixture was concentrated and the regioisomeric ratio determined using <sup>1</sup>H NMR spectroscopy. The crude residue was purified through flash column chromatography on silica gel (gradient eluent: 5–20% ethyl acetate in hexanes) to provide the cyclohexene derivatives **3** or **4**.

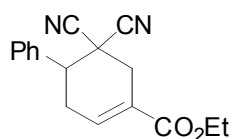

**Ethyl 5,5-Dicyano-4-phenylcyclohex-1-enecarboxylate (3a).** 98% yield as

a white solid: m.p. 99–101 °C; IR (film)  $\nu_{\text{max}}$  2982, 2924, 2251, 2229, 1710, 1658, 1277, 1260, 1235, 1103, 700  $\text{cm}^{-1}$ ; <sup>1</sup>H NMR (500 MHz, CDCl<sub>3</sub>)  $\delta$  7.43 (s, 5H), 7.23 (m, 1H), 4.27 (q,  $J = 7.2$  Hz, 2H), 3.34 (dm,  $J = 17.7$  Hz, 1H), 3.26 (dd,  $J = 10.4, 5.5$  Hz, 1H), 3.06 (ddt,  $J = 17.7, 3.7, 2.1$  Hz, 1H), 2.96 (dddt,  $J = 20.3, 10.4, 3.5, 2.6$  Hz, 1H), 2.78 (dm,  $J = 20.3$

Hz, 1H), 1.34 (t,  $J = 7.2$  Hz, 3H);  $^{13}\text{C}$  NMR (125 MHz,  $\text{CDCl}_3$ )  $\delta$  164.7, 138.4, 136.0, 129.3, 129.2, 128.0, 124.9, 114.8, 113.9, 61.3, 45.2, 37.1, 34.8, 29.2, 14.1; MS (MALDI) calcd for  $\text{C}_{17}\text{H}_{16}\text{N}_2\text{O}_2\text{Na}$   $[\text{M} + \text{Na}]^+$  303.111, found 303.115.

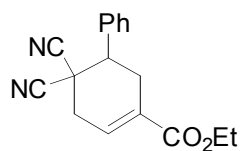

**Ethyl 4,4-Dicyano-5-phenylcyclohex-1-enecarboxylate (4a).** 93% yield

as a foam: IR (film)  $\nu_{\text{max}}$  3065, 3035, 2984, 2252, 1714, 1660, 1550 1431,

1273, 1255, 1103, 732  $\text{cm}^{-1}$ ;  $^1\text{H}$  NMR (500 MHz,  $\text{CDCl}_3$ )  $\delta$  7.40–7.48 (m,

5H), 6.93 (m, 1H), 4.25 (qd,  $J = 7.1, 10$  Hz, 2H), 3.24 (dd,  $J = 8.2, 8.2$  Hz, 1H), 3.17 (ddt,  $J =$

18.9, 5.1, 1.5 Hz, 1H), 3.07 (dq,  $J = 18.9, 3.0$  Hz, 1H), 2.92–2.97 (m, 2H), 1.31 (t,  $J = 7.2$  Hz,

3H);  $^{13}\text{C}$  NMR (125 MHz,  $\text{CDCl}_3$ )  $\delta$  165.0, 136.3, 131.4, 130.3, 129.2, 129.1, 128.0, 114.8,

113.9, 61.2, 45.8, 36.6, 36.3, 27.7, 14.1; MS (MALDI) calcd for  $\text{C}_{17}\text{H}_{16}\text{N}_2\text{O}_2\text{Na}$   $[\text{M} + \text{Na}]^+$

303.111, found 303.132.

### 3. Structural Assignment of Cyclohexenes 3a and 4a Through 1D and 2D NMR Spectroscopic Analyses

#### A. 1D and 2D NMR Spectra of Cyclohexene 3a

The structure of cyclohexene **3a** was assigned based on MS (MALDI) and  $^1\text{H}$ ,  $^{13}\text{C}$ ,  $^{13}\text{C}$ -DEPT, 2D-COSY, HMQC, and HMBC NMR spectroscopy experiments and further confirmed through single-crystal X-ray crystallographic analysis of cyclohexene **3d**. MS (MALDI) of cyclohexene **3a** gave a molecular ion at  $m/z$  303.115 ( $\text{M} + \text{Na}$ ), in accordance with the molecular formula  $\text{C}_{17}\text{H}_{16}\text{N}_2\text{O}_2$  with sodium incorporated. The  $^1\text{H}$  NMR spectrum indicated a total of sixteen protons: five aromatic protons (7.3–7.5 ppm) belonging to the phenyl ring, one vinylic proton (7.23 ppm) for the  $\alpha,\beta$ -unsaturated carboxylic ester, five protons for the ethyl carboxylic

ester [4.3 (q) and 1.3 (t) ppm], and five aliphatic protons between 2 and 3 ppm for the five ring protons.  $^{13}\text{C}$  NMR and  $^{13}\text{C}$  DEPT experiments suggested 15 carbon atoms, including three methylene units (two in the cyclohexene ring and one for the ethyl ester). A 2D COSY experiment validated the cross-coupling of the ring protons for cyclohexene **3a**. Couplings were observed for the  $\text{C}^2\text{H}-\text{C}^3\text{H}$ ,  $\text{C}^3\text{H}-\text{C}^3\text{H}'$ ,  $\text{C}^3\text{H}+\text{C}^3\text{H}'-\text{C}^4\text{H}$ , and  $\text{C}^6\text{H}-\text{C}^6\text{H}'$  units, consistent with the assigned structure **3a**. A 2D HMQC ( $^1\text{H}-^{13}\text{C}$  correlation) experiment indicated that  $\text{C}^3\text{H}-\text{C}^3\text{H}'$  coupling belonged to the  $\text{C}^3$  atom and  $\text{C}^6\text{H}-\text{C}^6\text{H}'$  coupling belonged to the  $\text{C}^6$  atom of the cyclohexene **3a**.

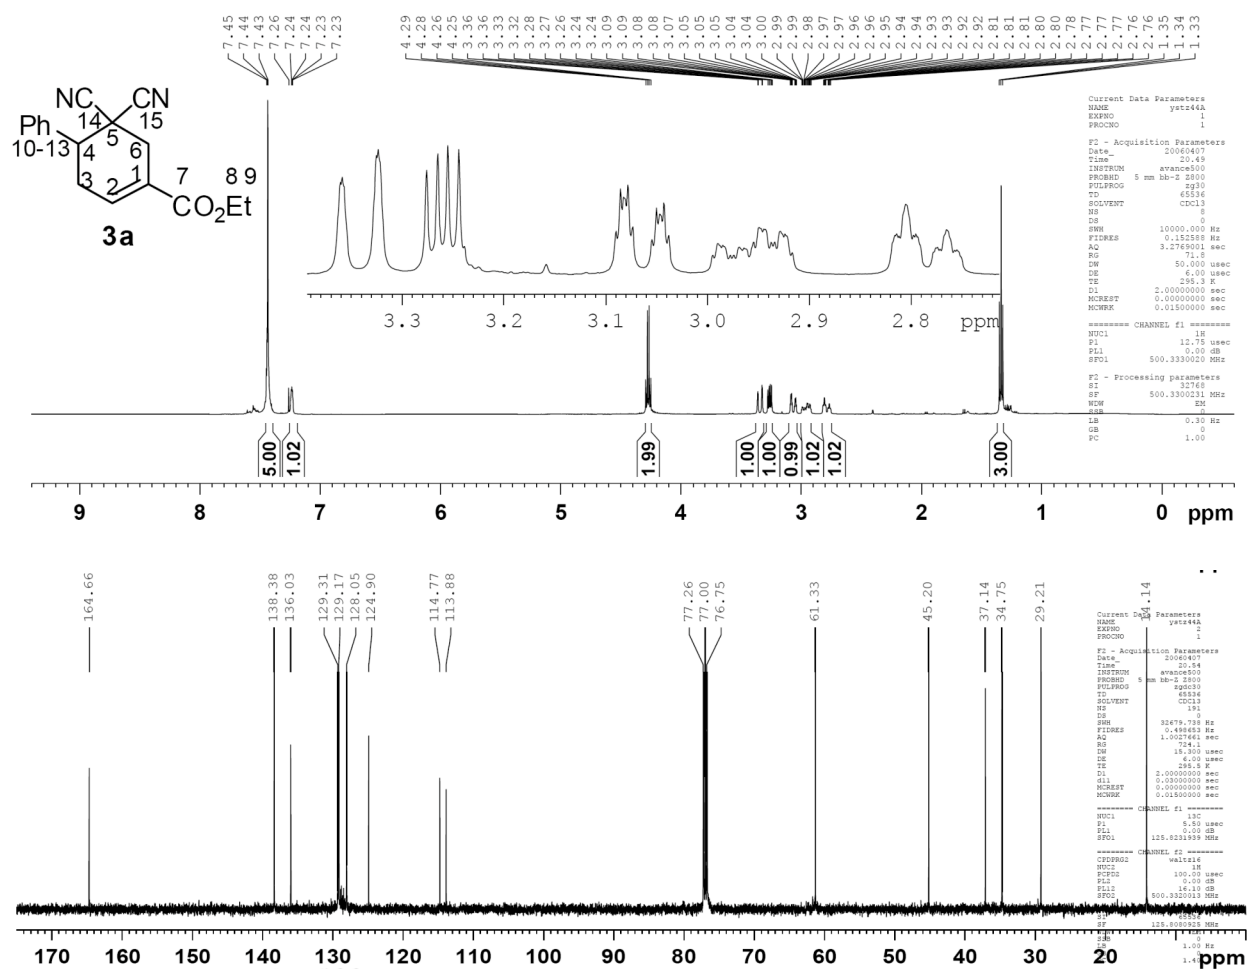

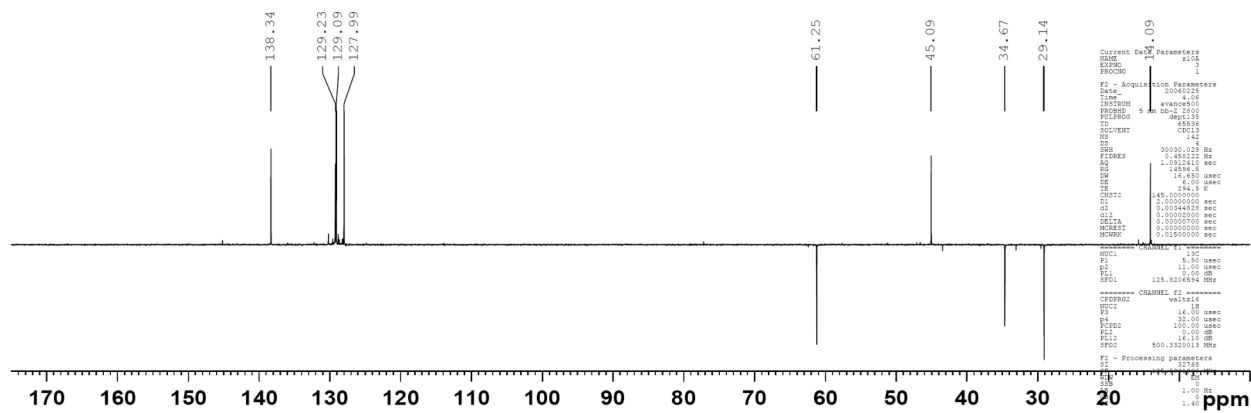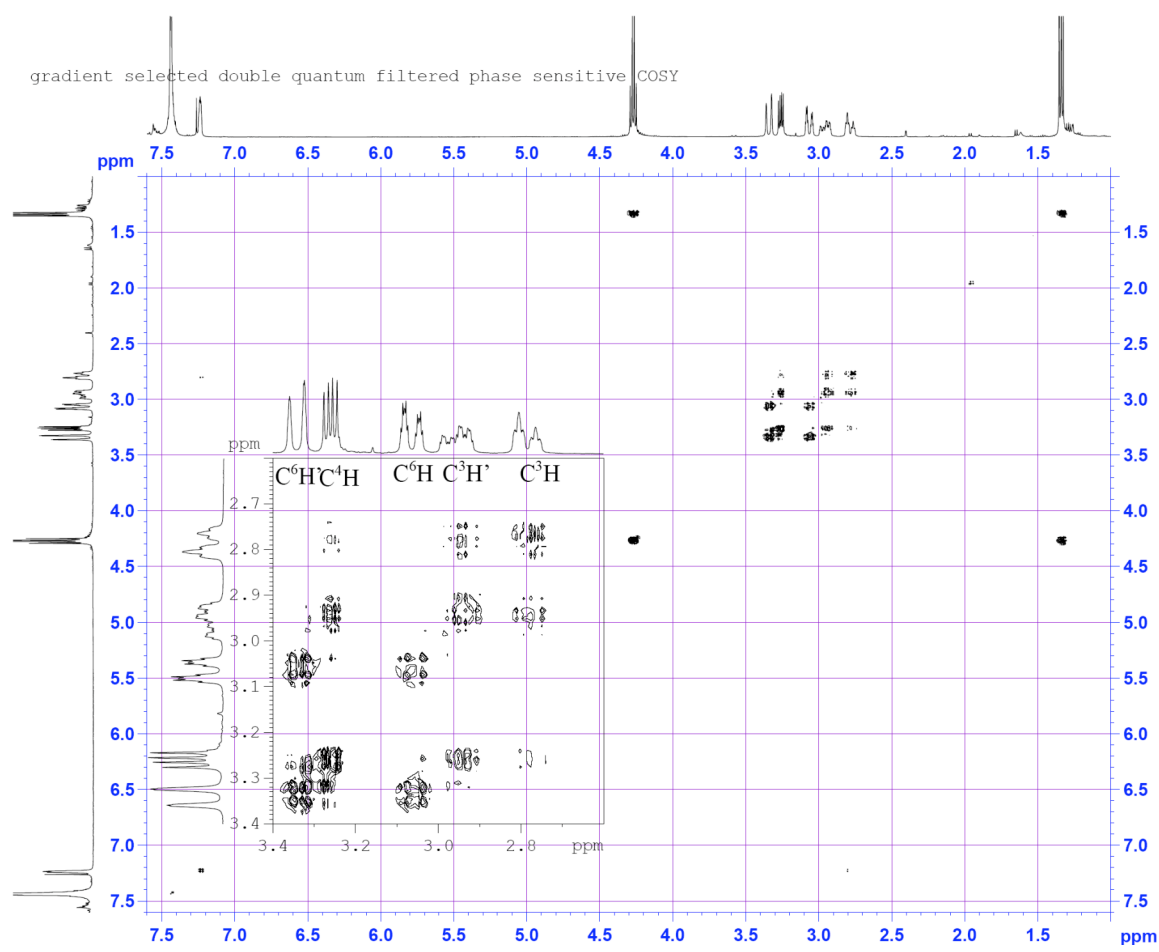

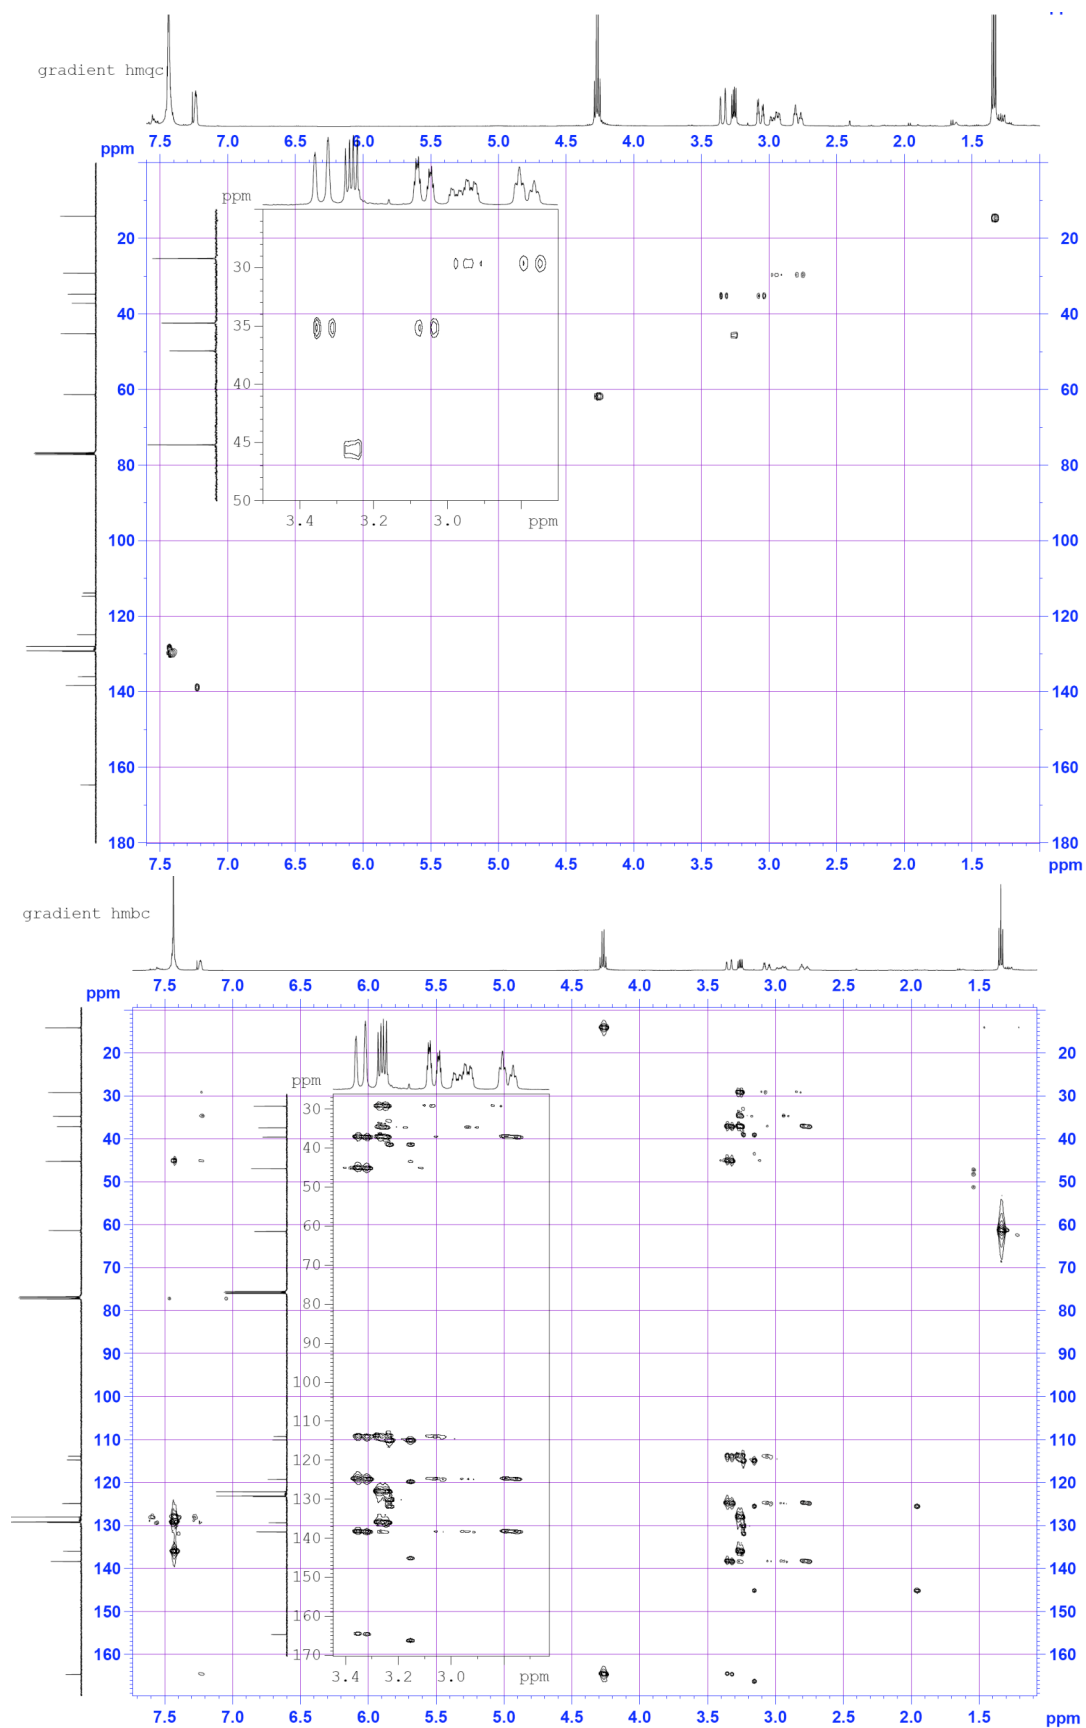

## B. 1D and 2D NMR Spectra of Cyclohexene 4a

The structure of cyclohexene **4a** was also assigned based on MS (MALDI) and  $^1\text{H}$ ,  $^{13}\text{C}$ ,  $^{13}\text{C}$ -DEPT, 2D-COSY, HMQC, and HMBC NMR spectroscopy experiments and further confirmed through single-crystal X-ray crystallographic analysis of cyclohexene **4f**. Similar to compound **3a**, the MALDI mass spectrum of cyclohexene **4a** gave a molecular ion at  $m/z$  303.132 ( $M + \text{Na}$ ), in accordance with the molecular formula  $\text{C}_{17}\text{H}_{16}\text{N}_2\text{O}_2$  with sodium incorporation. The number of protons and carbons suggested by the  $^1\text{H}$  NMR,  $^{13}\text{C}$  NMR, and  $^{13}\text{C}$  DEPT spectra of **4a** were similar to those of compound **3a**, although the  $^1\text{H}$  NMR spectrum of **4a** exhibited (a) the  $\text{C}^2\text{H}$  vinylic proton at 6.93 ppm (vs. 7.23 ppm) for the  $\alpha,\beta$ -unsaturated carboxylic ester and (b) very different coupling patterns of the five aliphatic protons (between 2 and 3 ppm) belonging to the cyclohexene ring. A 2D COSY experiment indicated the cross-coupling of the ring protons for cyclohexene **4a**. Couplings were observed for the  $\text{C}^2\text{H}-\text{C}^3\text{H}$ ,  $\text{C}^3\text{H}-\text{C}^3\text{H}'$ ,  $\text{C}^5\text{H}-\text{C}^6\text{H}+\text{C}^6\text{H}'$ , and  $\text{C}^6\text{H}-\text{C}^6\text{H}'$  units. A 2D HMQC ( $^1\text{H}-^{13}\text{C}$  correlation) experiment indicated that the  $\text{C}^3\text{H}$  and  $\text{C}^3\text{H}'$  protons belong to  $\text{C}^3$  and the  $\text{C}^6\text{H}$  and  $\text{C}^6\text{H}'$  protons to  $\text{C}^6$ .

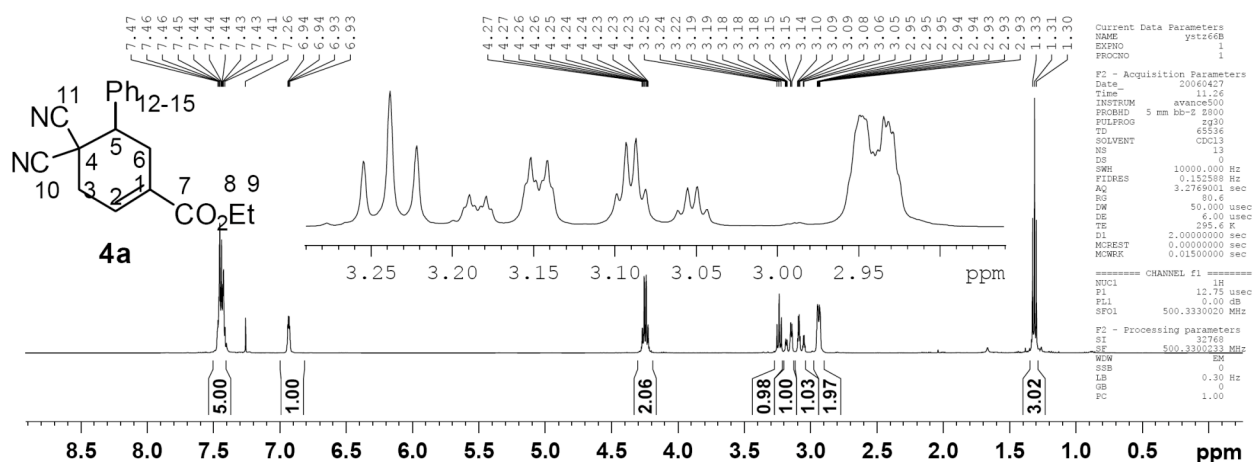



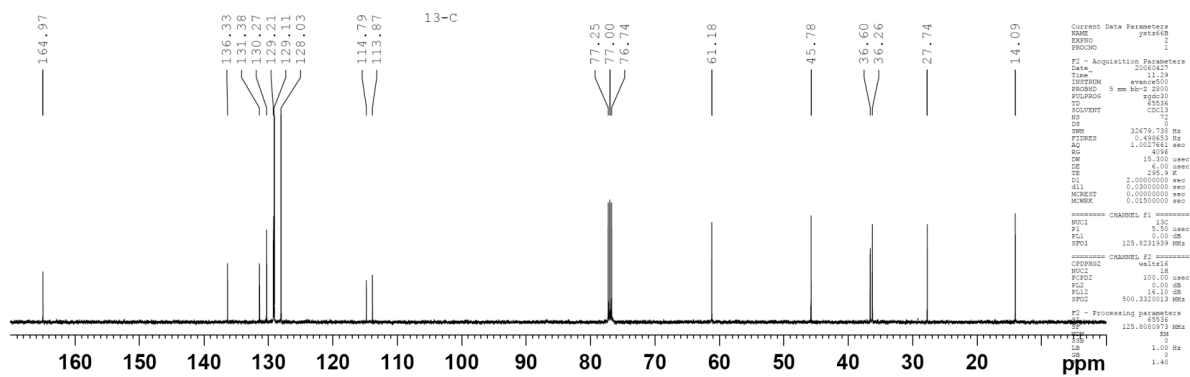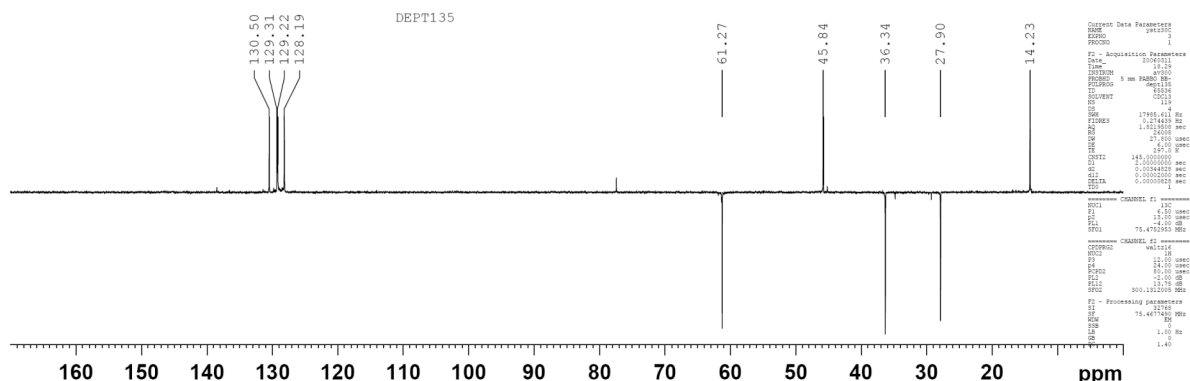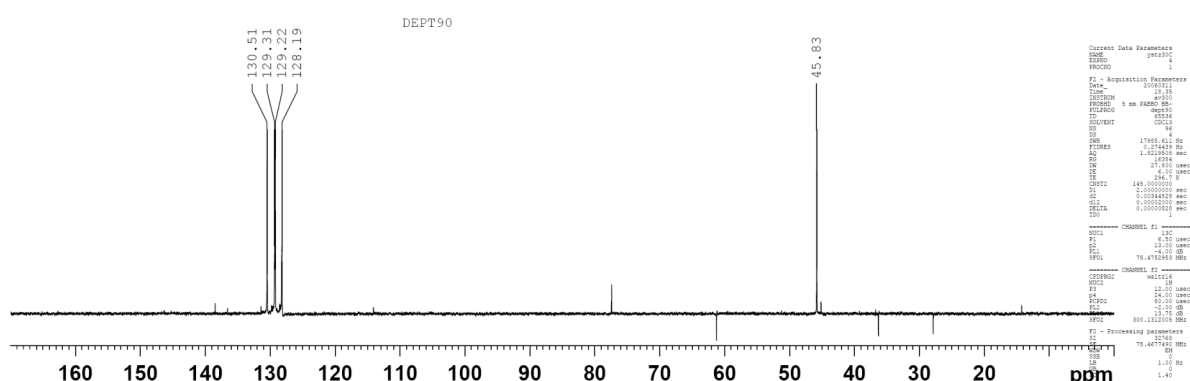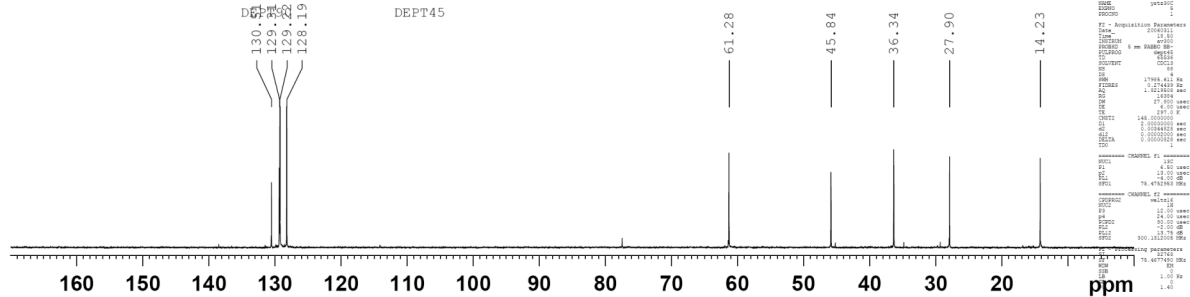

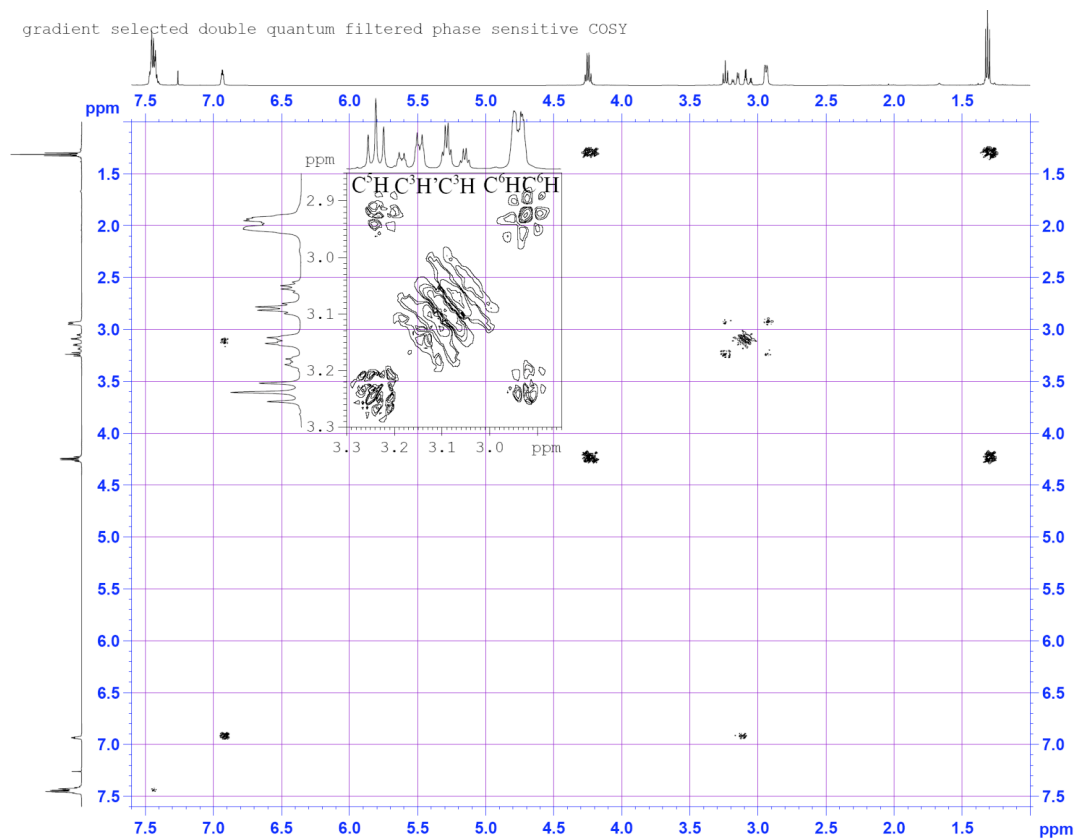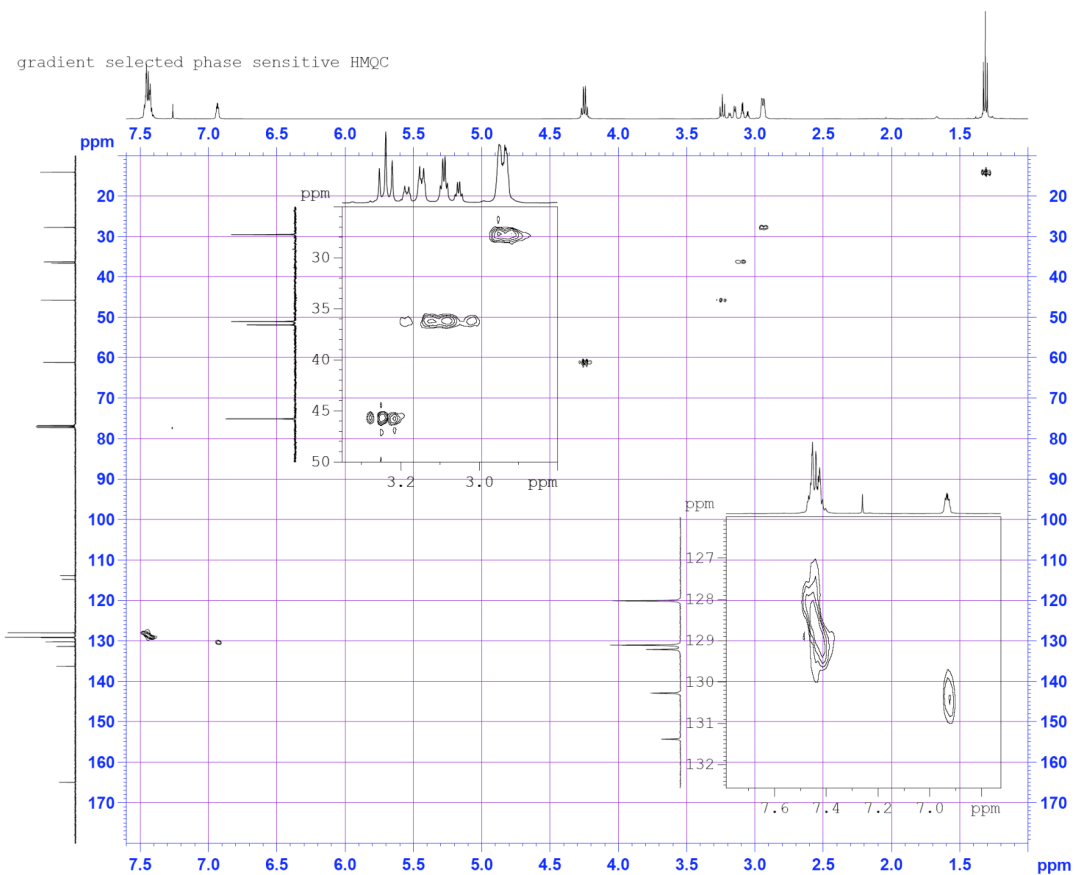

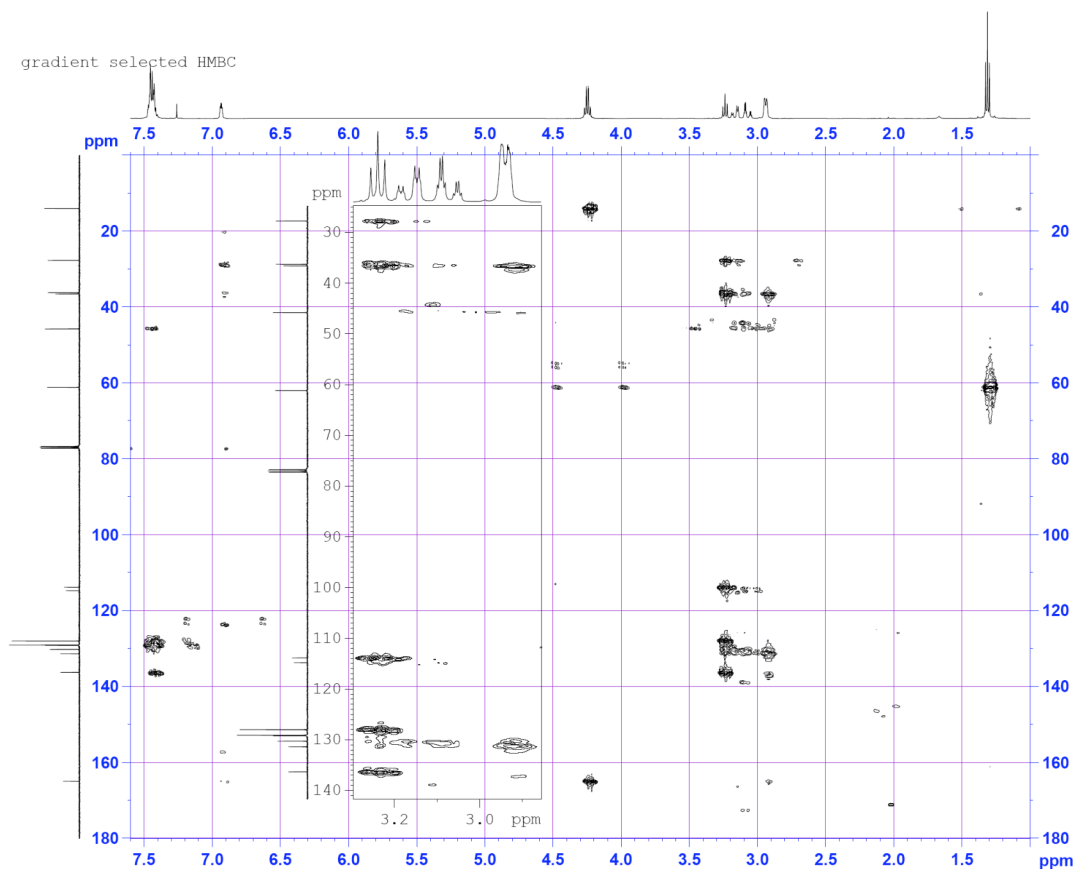

#### 4. Characterization of Tetrasubstituted Cyclohexene Derivatives 3 and 4

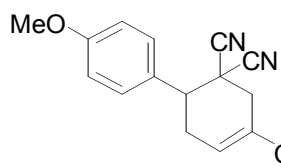

##### Ethyl 5,5-Dicyano-4-(4-methoxyphenyl)cyclohex-1-enecarboxylate

**(3b).** 94% yield: IR (film)  $\nu_{\max}$  2955, 2923, 2850, 2250, 2219, 1710,

1658, 1612, 1515, 1282, 1258, 1101, 1030  $\text{cm}^{-1}$ ;  $^1\text{H}$  NMR (500 MHz,  $\text{CDCl}_3$ )  $\delta$  7.35 (d,  $J = 8.8$  Hz, 2H), 7.22 (m, 1H), 6.94 (d,  $J = 8.8$  Hz, 2H), 4.26 (q,  $J = 7.1$  Hz, 2H), 3.82 (s, 3H), 3.31 (d,  $J = 17.7$  Hz, 1H), 3.22 (dd,  $J = 10.4, 5.4$  Hz, 1H), 3.07 (dq,  $J = 18.9, 3.0$  Hz, 1H), 2.92–2.97 (m, 2H), 1.31 (t,  $J = 7.1$  Hz, 3H);  $^{13}\text{C}$  NMR (125 MHz,  $\text{CDCl}_3$ )  $\delta$  165.0, 160.3, 136.3, 131.4, 130.3, 129.2, 129.1, 128.0, 114.8, 113.9, 61.2, 45.8, 36.6, 36.3, 27.7, 14.1; MS (MALDI) calcd for  $\text{C}_{18}\text{H}_{18}\text{N}_2\text{O}_3\text{Na}$  [ $\text{M} + \text{Na}$ ] 333.122, found 333.126.

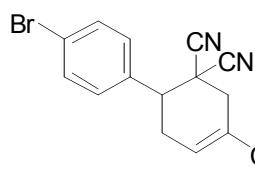**Ethyl 4-(4-Bromophenyl)-5,5-dicyanocyclohex-1-enecarboxylate (3c).**

86% yield; IR (film)  $\nu_{\max}$  2980, 2918, 2850, 2250, 2224, 1711, 1660, 1263, 1235, 1103, 1075, 1012  $\text{cm}^{-1}$ ;  $^1\text{H}$  NMR (300 MHz,  $\text{CDCl}_3$ )  $\delta$  7.56 (d,  $J = 8.5$  Hz, 2H), 7.31 (d,  $J = 8.5$  Hz, 2H), 7.20 (m, 1H), 4.26 (q,  $J = 7.1$  Hz, 2H), 3.34 (d,  $J = 17.7$  Hz, 1H), 3.23 (dd,  $J = 10.2, 5.7$  Hz, 1H), 3.04 (ddt,  $J = 17.7, 3.5, 2.3$  Hz, 1H), 2.91 (ddm,  $J = 20.0, 10.2$  Hz, 1H), 2.75 (dtm,  $J = 20.0, 5.0$  Hz, 1H), 1.28 (t,  $J = 7.1$  Hz, 3H);  $^{13}\text{C}$  NMR (125 MHz,  $\text{CDCl}_3$ )  $\delta$  164.4, 137.8, 135.0, 132.2, 129.6, 124.8, 123.3, 114.5, 113.5, 61.2, 44.4, 34.8, 34.4, 28.8, 14.0; MS (EI) calcd for  $\text{C}_{17}\text{H}_{15}\text{N}_2\text{O}_2\text{Br}$   $[\text{M}]^+$  358.0, found 358.0.

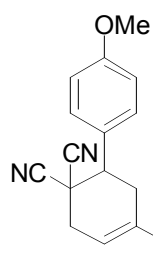**Ethyl 4,4-Dicyano-5-(4-methoxyphenyl)cyclohex-1-enecarboxylate (4b).**

90% yield; IR (film)  $\nu_{\max}$  3061, 2964, 2841, 2251, 1713, 1660, 1611, 1516, 1257, 1101, 1031, 833, 801, 737  $\text{cm}^{-1}$ ;  $^1\text{H}$  NMR (500 MHz,  $\text{CDCl}_3$ )  $\delta$  7.38 (d,  $J = 8.7$  Hz, 2H), 6.95 (d,  $J = 8.7$  Hz, 2H), 6.92 (m, 1H), 4.25 (qd,  $J = 7.1, 1.3$  Hz, 2H), 3.83 (s, 3H), 3.20 (t,  $J = 8.1$  Hz, 1H), 3.15 (ddt,  $J = 18.9, 5.1, 1.6$  Hz, 1H), 3.0 (dq,  $J = 18.8, 3.0$  Hz, 1H), 2.90 (ddt,  $J = 8.1, 2.9, 1.4$  Hz, 2H), 1.31 (t,  $J = 7.1$  Hz, 3H);  $^{13}\text{C}$  NMR (125 MHz,  $\text{CDCl}_3$ )  $\delta$  165.1, 160.2, 131.5, 130.2, 129.2, 128.3, 115.0, 114.5, 114.0, 61.2, 55.3, 45.2, 37.0, 36.2, 27.8, 14.1; MS (MALDI) calcd for  $\text{C}_{18}\text{H}_{18}\text{N}_2\text{O}_3\text{Na}$   $[\text{M} + \text{Na}]^+$  333.122, found 333.124.

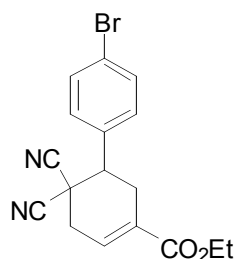**Ethyl 5-(4-Bromophenyl)-4,4-dicyanocyclohex-1-enecarboxylate (4c).**

85% yield; IR (film)  $\nu_{\max}$  3062, 2983, 2933, 2251, 1713, 1660, 1591, 1491, 1262, 1238, 1103, 1075, 1010, 826, 735  $\text{cm}^{-1}$ ;  $^1\text{H}$  NMR (300 MHz,  $\text{CDCl}_3$ )  $\delta$

7.58 (d,  $J = 8.5$  Hz, 2H), 7.34 (d,  $J = 8.5$  Hz, 2H), 6.93 (m, 1H), 4.25 (q,  $J = 7.1$  Hz, 2H), 3.21 (dd,  $J = 9.8, 6.4$  Hz, 1H), 3.14 (dt,  $J = 5.0, 1.63$  Hz, 1H), 3.06 (dq,  $J = 18.9, 2.9$  Hz, 1H), 2.85–2.95 (m, 2H), 1.31 (t,  $J = 7.1$  Hz, 3H);  $^{13}\text{C}$  NMR (125 MHz,  $\text{CDCl}_3$ )  $\delta$  164.8, 135.3, 132.3, 131.1, 130.2, 129.7, 123.4, 114.6, 113.6, 61.2, 45.2, 36.4, 36.1, 27.5, 14.1; MS (EI) calcd for  $\text{C}_{17}\text{H}_{15}\text{N}_2\text{O}_2\text{Br}$   $[\text{M}]^+$  358.0, found 358.0.

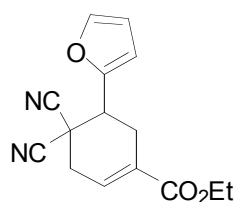

**Ethyl 4,4-Dicyano-5-(furan-2-yl)cyclohex-1-enecarboxylate (4d).** 88%

yield; IR (film)  $\nu_{\text{max}}$  3058, 2984, 2934, 2250, 2222, 1713, 1656, 1591, 1491, 1447, 1385, 1264, 1102, 1076, 1015, 826, 737  $\text{cm}^{-1}$ ;  $^1\text{H}$  NMR (500 MHz,  $\text{CDCl}_3$ )  $\delta$  7.47 (dd,  $J = 1.8, 1.1$  Hz, 1H), 6.90 (m, 1H), 6.48 (d,  $J = 3.3$  Hz, 1H), 6.42 (dd,  $J = 3.3, 1.7$  Hz, 1H), 4.25 (q,  $J = 7.1$  Hz, 2H), 3.50 (dd,  $J = 10.2, 5.5$  Hz, 1H), 3.12 (ddt,  $J = 18.9, 4.9, 1.4$  Hz, 1H), 2.93–3.07 (m, 2H), 2.88 (dddt,  $J = 18.9, 10.2, 1.9$  Hz, 1H), 1.32 (t,  $J = 7.13$  Hz, 3H);  $^{13}\text{C}$  NMR (500 MHz,  $\text{CDCl}_3$ )  $\delta$  164.9, 149.7, 143.4, 130.6, 130.2, 114.7, 113.5, 110.7, 109.1, 61.3, 39.6, 35.33, 35.31, 26.3, 14.1; MS (MALDI) calcd for  $\text{C}_{15}\text{H}_{14}\text{N}_2\text{O}_3\text{Na}$   $[\text{M} + \text{Na}]^+$  293.0902, found 293.0900.

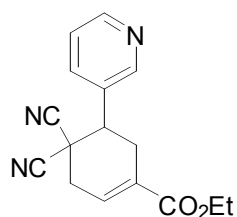

**Ethyl 4,4-Dicyano-5-(pyridin-3-yl)cyclohex-1-enecarboxylate (4e).** 80%

yield; IR (film)  $\nu_{\text{max}}$  3036, 2983, 2915, 2251, 1712, 1660, 1592, 1429, 1259, 1104, 1027, 737, 714  $\text{cm}^{-1}$ ;  $^1\text{H}$  NMR (500 MHz,  $\text{CDCl}_3$ )  $\delta$  8.67 (s, 2H), 7.84 (dt,  $J = 8.0, 1.8$  Hz, 1H), 7.14 (td,  $J = 8.7, 2.1$  Hz, 1H), 6.90–6.96 (m, 1H), 4.23 (qd,  $J = 7.1, 0.8$  Hz, 2H), 3.28 (dd,  $J = 9.6, 6.8$  Hz, 1H), 3.17 (ddt,  $J = 18.9, 5.1, 1.4$  Hz, 1H), 3.08 (dq,  $J = 18.9, 2.9$  Hz, 1H), 2.88–2.95 (m, 2H), 1.29 (t,  $J = 7.1$  Hz, 3H);  $^{13}\text{C}$  NMR (125

MHz, CDCl<sub>3</sub>)  $\delta$  164.7, 150.6, 150.0, 135.0, 132.1, 131.0, 130.2, 123.8, 114.4, 113.4, 61.3, 43.5, 36.3, 36.0, 27.5, 14.0; MS (MALDI) calcd for C<sub>16</sub>H<sub>16</sub>N<sub>3</sub>O<sub>2</sub> [M + H]<sup>+</sup> 282.124, found 282.129.

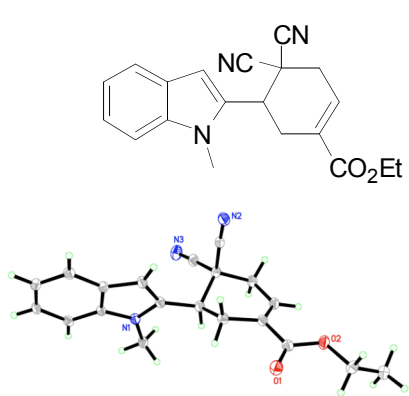

**Ethyl 4,4-Dicyano-5-(1-methyl-1H-indol-2-yl)cyclohex-1-enecarboxylate (4f).** 91% yield as a bright-orange solid: m.p.

203–204 °C; IR (film)  $\nu_{\max}$  3058, 2980, 2934, 2252, 1714, 1661, 1469, 1277, 1256, 1102, 745, 730 cm<sup>-1</sup>; <sup>1</sup>H NMR (500 MHz, CDCl<sub>3</sub>)  $\delta$  7.65 (d, *J* = 7.9 Hz, 1H), 7.36 (d, *J* = 8.2 Hz, 1H), 7.29 (dd, *J* = 8.2, 7.4 Hz, 1H), 7.17 (dd, *J* = 7.9, 7.4 Hz, 1H), 6.96 (br

s, 1H), 6.80 (s, 1H), 4.27 (q, *J* = 7.1 Hz, 2H), 3.80 (s, 3H), 3.63 (dd, *J* = 10.2, 5.4 Hz, 1H), 3.22 (br dd, *J* = 18.8, 4.4 Hz, 1H), 2.90–3.15 (m, 3H), 1.33 (t, *J* = 7.1 Hz, 3H); <sup>13</sup>C NMR (125 MHz, CDCl<sub>3</sub>)  $\delta$  164.8, 137.5, 135.0, 131.2, 130.3, 127.2, 122.5, 120.9, 120.2, 114.9, 113.7, 109.6, 101.3, 61.3, 37.2, 36.3, 35.8, 30.1, 28.9, 14.1; MS (EI) calcd for C<sub>20</sub>H<sub>19</sub>N<sub>3</sub>O<sub>2</sub> [M]<sup>+</sup> 333.1, found 333.1.

### 5. Characterization of Pentasubstituted Cyclohexene Derivatives 3

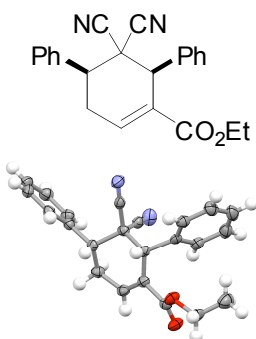

***cis*-Ethyl 5,5-Dicyano-4,6-diphenylcyclohex-1-enecarboxylate (3d).** 93%

yield as a 82:18 mixture of *cis* and *trans* isomers: IR (film)  $\nu_{\max}$  3032, 2960, 2924, 2853, 2247, 2215, 1719, 1656, 1603, 1495, 1455, 1371, 1257, 1103,

1021, 800, 733, 701 cm<sup>-1</sup>; <sup>1</sup>H NMR (500 MHz, CDCl<sub>3</sub>)  $\delta$  7.35–7.52 (m, 10H), 7.22 (ddd, *J* = 6.1, 2.2, 2.0 Hz, 1H), 4.5 (dt, *J* = 4.1, 2.0 Hz, 1H), 4.00

(dq, *J* = 10.8, 7.1 Hz, 1H), 3.90 (dq, *J* = 10.8, 7.1 Hz, 1H), 3.45 (dd, *J* = 12.2, 4.4 Hz, 1H), 3.18 (dddd, *J* = 19.5, 12.2, 4.1, 2.2 Hz, 1H), 2.74 (dddd, *J* = 19.5, 6.2, 4.4, 2.0 Hz, 1H), 0.89 (t, *J* = 7.1

Hz, 3H);  $^{13}\text{C}$  NMR (125 MHz,  $\text{CDCl}_3$ )  $\delta$  165.4, 138.3, 136.0, 135.7, 130.5, 129.4, 129.2, 128.9, 128.82, 128.83, 128.3, 114.2, 112.5, 60.8, 51.6, 47.2, 47.1, 28.8, 13.6; MS (MALDI) calcd for  $\text{C}_{23}\text{H}_{20}\text{N}_2\text{O}_2\text{Na}$   $[\text{M} + \text{Na}]^+$  379.142, found 379.145.

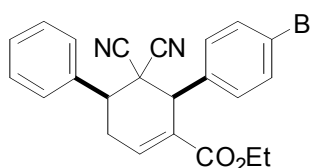

***cis*-Ethyl 6-(4-Bromophenyl)-5,5-dicyano-4-phenylcyclohex-1-enecarboxylate (3e).** 95% yield as a white solid, an 89:11 mixture of *cis* and *trans* isomers: m.p. 160–161 °C (*cis* isomer): IR (film)  $\nu_{\text{max}}$

3033, 2982, 2253, 2217, 1716, 1655, 1489, 1267, 1253, 1012, 909, 731, 701  $\text{cm}^{-1}$ ;  $^1\text{H}$  NMR (500 MHz,  $\text{CDCl}_3$ )  $\delta$  7.27–7.57 (m, 9H), 7.25 (ddd,  $J = 6.2, 2.1, 2.1$  Hz, 1H), 4.45–4.52 (m, 1H), 4.92–4.15 (m, 2H), 3.44 (dd,  $J = 12.2, 4.4$  Hz, 1H), 3.17 (dddd,  $J = 19.6, 12.2, 4.1, 2.1$  Hz, 1H), 2.75 (dddd,  $J = 19.6, 6.2, 4.5, 1.8$  Hz, 1H), 0.98 (t,  $J = 7.1$  Hz, 3H);  $^{13}\text{C}$  NMR (125 MHz,  $\text{CDCl}_3$ )  $\delta$  165.0, 139.0, 135.7, 134.9, 132.0, 129.8, 129.4, 129.2, 129.1, 128.2, 123.0, 114.0, 112.3, 61.0, 50.9, 47.0, 46.9, 28.7, 13.7; MS (EI) calcd for  $\text{C}_{23}\text{H}_{19}\text{N}_2\text{O}_2\text{Br}$   $[\text{M}]^+$  434, found 434.

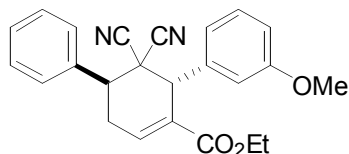

***trans*-Ethyl 5,5-Dicyano-6-(3-methoxyphenyl)-4-phenylcyclohex-1-enecarboxylate (3f).** 92% yield as a 78:22 mixture of *cis* and *trans* isomers: IR (film)  $\nu_{\text{max}}$  3061, 3034, 2981,

2934, 2840, 2247, 2226, 1713, 1658, 1602, 1491, 1457, 1273, 1248, 1158, 1100, 103  $\text{cm}^{-1}$ ;  $^1\text{H}$  NMR (500 MHz,  $\text{CDCl}_3$ )  $\delta$  7.45 (dd,  $J = 4.5, 2.8$  Hz, 1H), 7.30–7.40 (m, 6H), 6.92–6.97 (m, 2H), 6.89–6.92 (m, 1H), 4.68 (s, 1H), 4.05–4.20 (m, 2H), 3.84 (s, 3H), 3.37 (dd,  $J = 11.4, 5.6$  Hz, 1H), 3.05 (ddt,  $J = 20.5, 11.5, 2.1$  Hz, 1H), 2.88 (dt,  $J = 20.5, 5.2$  Hz, 1H), 1.18 (t,  $J = 7.1$  Hz, 3H);  $^{13}\text{C}$  NMR (125 MHz,  $\text{CDCl}_3$ )  $\delta$  165.3, 159.7, 139.1, 136.0, 135.9, 129.7, 129.2, 129.0,

128.4, 127.8, 122.2, 116.3, 114.6, 114.2, 113.3, 61.2, 55.3, 48.6, 43.6, 40.2, 29.8, 13.9; MS (MALDI) calcd for  $C_{24}H_{22}N_2O_3$   $[M]^+$  409.1528, found 409.1525.

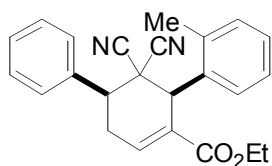

***cis*-Ethyl 5,5-Dicyano-6-(2-methoxyphenyl)-4-phenylcyclohex-1-enecarboxylate (3g).** 91% yield as a 64:36 mixture of *cis* and *trans*

isomers: m.p. 179–180 °C; IR (film)  $\nu_{\max}$  3065, 3030, 2981, 2931, 2250,

1718, 1655, 1493, 1456, 1370, 1283, 1253, 1216, 1112, 1051, 1020, 7612, 742, 724, 698  $cm^{-1}$ ;

$^1H$  NMR (500 MHz,  $CDCl_3$ )  $\delta$  7.18–7.58 (m, 9H), 7.14 (ddd,  $J = 6.1, 2.3, 2.3$  Hz, 1H), 4.90

(ddd,  $J = 4.1, 2.0, 2.0$  Hz, 1H), 3.82–3.98 (m, 2H), 3.51 (dd,  $J = 12.2, 4.4$  Hz, 1H), 3.22 (dddd,  $J$

= 19.5, 12.3, 4.2, 2.3 Hz, 1H), 2.74 (dddd,  $J = 19.5, 6.2, 4.4, 1.8$  Hz, 1H), 2.62 (s, 3H), 0.88 (t,  $J$

= 7.1 Hz, 3H);  $^{13}C$  NMR (125 MHz,  $CDCl_3$ )  $\delta$  165.3, 137.3, 137.2, 135.9, 134.2, 131.8, 131.1,

128.4, 129.1, 128.6, 128.4, 127.3, 126.4, 114.4, 112.9, 40.8, 47.7, 46.0, 45.9, 28.9, 19.9, 13.5;

MS (EI) calcd for  $C_{24}H_{22}N_2O_3$   $[M]^+$  370, found 370.

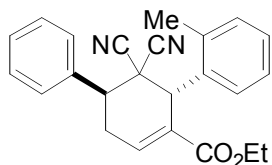

***trans*-Ethyl 5,5-Dicyano-6-(2-methoxyphenyl)-4-phenylcyclohex-1-enecarboxylate (3g).** IR (film)  $\nu_{\max}$  3066, 3025, 2983, 2935, 2247, 1714,

1660, 1489, 1456, 1420, 1276, 1249, 1224, 1101, 1084, 1027, 757, 731,

667  $cm^{-1}$ ;  $^1H$  NMR (500 MHz,  $CDCl_3$ )  $\delta$  7.44 (dd,  $J = 7.4, 2.7$  Hz, 1H), 7.06–7.4 (m, 9H), 5.05

(s, 1H), 4.02–4.15 (m, 2H), 3.53 (dd,  $J = 11.7, 5.6$  Hz, 1H), 3.08 (dddd,  $J = 20.4, 11.7, 2.3, 2.3$

Hz, 1H), 2.91 (ddd,  $J = 20.4, 5.3, 5.3$  Hz, 1H), 2.65 (s, 3H), 1.16 (t,  $J = 7.1$  Hz, 3H);  $^{13}C$  NMR

(125 MHz,  $CDCl_3$ )  $\delta$  164.3, 138.6, 138.4, 135.8, 133.6, 131.6, 129.2, 129.01, 129.00, 128.9,

128.5, 128.5, 126.0, 114.8, 113.0, 61.2, 44.1, 42.6, 40.0, 29.3, 20.3, 13.8; MS (EI) calcd for

$C_{24}H_{22}N_2O_3$   $[M]^+$  370, found 370.



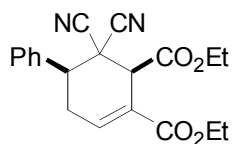**cis-Diethyl 6,6-Dicyano-5-phenylcyclohex-2-ene-1,2-dicarboxylate (3h).**

96% yield as a 66:33 mixture of cis and trans isomers: IR (film)  $\nu_{\max}$  3065, 3036, 2984, 2919, 2249, 1739, 1712, 1660, 1451, 1373, 1258, 1187, 1102, 1031, 701  $\text{cm}^{-1}$ ;  $^1\text{H}$  NMR (500 MHz,  $\text{CDCl}_3$ )  $\delta$  7.40–7.52 (m, 5H), 7.25 (ddd,  $J = 6.1, 2.1, 2.0$  Hz, 1H), 4.19–4.4 (m, 4H), 4.17 (dt,  $J = 3.6, 1.7$  Hz, 1H), 3.27 (dd,  $J = 11.9, 4.5$  Hz, 1H), 3.07 (dddd,  $J = 19.7, 12.0, 3.6, 2.2$  Hz, 1H), 2.70 (ddd,  $J = 19.7, 5.3, 1.6$  Hz, 1H), 1.32 (t,  $J = 7.1$  Hz, 3H), 1.29 (t,  $J = 7.1$  Hz, 3H);  $^{13}\text{C}$  NMR (125 MHz,  $\text{CDCl}_3$ )  $\delta$  167.3, 164.5, 139.2, 135.0, 129.5, 129.1, 128.4, 128.5, 113.2, 111.6, 62.6, 61.4, 50.9, 46.4, 41.1, 28.6, 14.0, 13.8; MS (MALDI) calcd for  $\text{C}_{20}\text{H}_{20}\text{N}_2\text{O}_2\text{Na}$   $[\text{M} + \text{Na}]^+$  375.132, found 375.136.

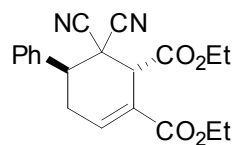**trans-Diethyl 6,6-Dicyano-5-phenylcyclohex-2-ene-1,2-dicarboxylate**

**(3h).** IR (film)  $\nu_{\max}$  2984, 2934, 2252, 17412, 1712, 1423, 1303, 1259, 1187, 1127  $\text{cm}^{-1}$ ;  $^1\text{H}$  NMR (500 MHz,  $\text{CDCl}_3$ )  $\delta$  7.37–7.50 (m, 5H), 7.35 (dd,  $J = 4.7, 2.4$  Hz, 1H), 4.15–4.4 (m, 5H), 3.80 (dd,  $J = 11.2, 5.3$  Hz, 1H), 2.94 (ddm,  $J = 20.6, 11.5$  Hz, 1H), 2.8 (dt,  $J = 20.4, 5.2$  Hz, 1H), 1.33 (t,  $J = 7.1$  Hz, 3H), 1.29 (t,  $J = 7.1$  Hz, 3H);  $^{13}\text{C}$  NMR (125 MHz,  $\text{CDCl}_3$ )  $\delta$  167.9, 164.0, 141.0, 135.5, 129.2, 129.0, 128.2, 124.2, 112.8, 112.4, 62.7, 61.4, 47.9, 41.0, 39.7, 29.1, 13.8, 13.8; MS (MALDI) calcd for  $\text{C}_{20}\text{H}_{20}\text{N}_2\text{O}_2\text{Na}$   $[\text{M} + \text{Na}]^+$  375.132, found 375.137.

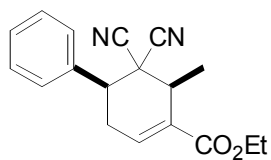**cis-Ethyl 5,5-Dicyano-6-methyl-4-phenylcyclohex-1-ene-1-carboxylate**

**(3i).** 95% yield as an 80:20 mixture of cis and trans isomers: m.p. 92–93  $^{\circ}\text{C}$ ; IR (film)  $\nu_{\max}$  3062, 3033, 2976, 2935, 2229, 1728, 1640, 1583, 1453, 1372, 1247, 1185, 1105, 1025, 766, 738, 701  $\text{cm}^{-1}$ ;  $^1\text{H}$  NMR (500 MHz,  $\text{CDCl}_3$ )  $\delta$  7.40–7.50 (m,

5H), 7.01 (ddd,  $J = 6.0, 2.1, 2.1$  Hz, 1H), 4.20–4.30 (m, 2H), 3.32–3.40 (m, 1H), 3.22 (dd,  $J = 12.1, 4.6$  Hz, 1H), 2.99 (dddd,  $J = 19.5, 12.2, 3.8, 2.3$  Hz, 1H), 2.62 (dddd,  $J = 19.5, 6.1, 4.5, 1.7$  Hz, 1H), 1.62 (d,  $J = 7.0$  Hz, 3H), 1.34 (t,  $J = 7.2$  Hz, 3H);  $^{13}\text{C}$  NMR (125 MHz,  $\text{CDCl}_3$ )  $\delta$  165.4, 136.8, 136.3, 131.0, 129.2, 129.1, 128.2, 114.9, 112.6, 61.1, 46.3, 46.0, 40.5, 28.8, 16.2, 14.1; MS (EI) calcd for  $\text{C}_{18}\text{H}_{18}\text{N}_2\text{O}_2$   $[\text{M}]^+$  294 found 294.

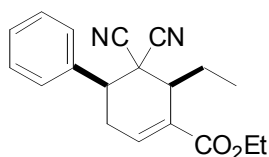

***cis*-Ethyl 5,5-Dicyano-6-ethyl-4-phenylcyclohex-1-enecarboxylate**

**(3j)**. 98% yield as a 92:8 mixture of *cis* and *trans* isomers: IR (film)  $\nu_{\text{max}}$  2973, 2936, 2877, 2248, 2228, 1715, 1456, 1374, 1246, 766, 735, 701  $\text{cm}^{-1}$ ;  $^1\text{H}$  NMR (300 MHz,  $\text{CDCl}_3$ )  $\delta$  7.40–7.50 (m, 5H), 7.00 (ddd,  $J = 6.4, 2.0, 2.0$  Hz, 1H), 4.26 (q,  $J = 7.1$  Hz, 2H), 3.26–3.34 (m, 1H), 3.20 (dd,  $J = 12.0, 4.2$  Hz, 1H), 3.00 (dddd,  $J = 19.0, 12.0, 3.6, 2.2$  Hz, 1H), 2.59 (dddd,  $J = 19.0, 6.3, 4.3, 1.8$  Hz, 1H), 2.12 (dq,  $J = 15.0, 7.6, 3.1$  Hz, 1H), 1.91 (dq,  $J = 15.0, 7.6, 1.3$  Hz, 1H), 1.35 (t,  $J = 7.1$  Hz, 3H), 1.25 (t,  $J = 7.1$  Hz, 3H);  $^{13}\text{C}$  NMR (500 MHz,  $\text{CDCl}_3$ )  $\delta$  165.9, 136.7, 136.0, 131.5, 129.3, 128.0, 128.5, 115.5, 113, 61.2, 46.8, 46.2, 44.0, 28.3, 25.3, 14.1, 12.3; MS (EI) calcd for  $\text{C}_{19}\text{H}_{20}\text{N}_2\text{O}_2$   $[\text{M}]^+$  308, found 308.

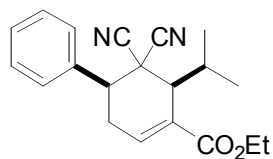

***cis*-Ethyl 5,5-Dicyano-6-isopropyl-4-phenylcyclohex-1-enecarboxylate**

**(3k)**. 77% yield as a 34:66 mixture of *cis* and *trans* isomers: IR (film)  $\nu_{\text{max}}$  3035, 2973, 2935, 2248, 1714, 1641, 1459, 1370, 1245, 1097, 1048, 738, 700  $\text{cm}^{-1}$ ;  $^1\text{H}$  NMR (500 MHz,  $\text{CDCl}_3$ )  $\delta$  7.4–7.5 (m, 5H), 6.97 (ddd,  $J = 6.5, 2.0, 2.0$  Hz, 1H), 4.2–4.35 (m, 2H), 3.38–3.44 (m, 1H), 3.20 (dd,  $J = 11.8, 4.2$  Hz, 1H), 3.02 (dddd,  $J = 19.0, 11.9, 3.7, 2.3$  Hz, 1H), 2.58 (dddd,  $J = 19.0, 6.4, 4.4, 1.8$  Hz, 1H), 2.46 (dq,  $J = 7.1, 7.1, 2.7$  Hz, 1H), 1.35 (t,  $J = 7.1$  Hz, 3H), 1.30 (d,  $J = 7.1$  Hz, 3H), 1.12 (t,  $J = 7.1$  Hz, 3H);  $^{13}\text{C}$  NMR (125 MHz,

CDCl<sub>3</sub>) δ 166.9, 136.8, 136.0, 131.3, 129.2, 129.0, 128.5, 115.6, 113.8, 61.2, 50.2, 46.8, 44.6, 31.4, 28.1, 22.3, 18.8, 14.1; MS (MALDI) calcd for C<sub>20</sub>H<sub>22</sub>N<sub>2</sub>O<sub>2</sub>Na [M + Na]<sup>+</sup> 345.1579, found 345.1589.

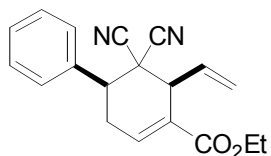

***cis*-Ethyl 5,5-Dicyano-4-phenyl-6-vinylcyclohex-1-enecarboxylate**

**(31)**. 94% yield as a 91:9 mixture of *cis* and *trans* isomers: IR (film)  $\nu_{\max}$  3064, 3035, 2984, 2933, 2907, 2250, 1717, 1653, 1496, 1455, 1422, 1371, 1256, 1109, 1050, 733, 701 cm<sup>-1</sup>; <sup>1</sup>H NMR (500 MHz, CDCl<sub>3</sub>) δ 7.38–7.5 (m, 5H), 7.10 (ddd, *J* = 6.0, 2.2, 2.2 Hz, 1H), 5.86 (ddd, *J* = 17.0, 8.9, 10.1 Hz, 1H), 5.58 (d, *J* = 17.0 Hz, 1H), 5.52 (d, *J* = 10.1 Hz, 1H), 4.16–4.28 (m, 2H), 3.82–3.90 (m, 1H), 3.27 (dd, *J* = 12.0, 4.6 Hz, 1H), 3.03 (dddd, *J* = 19.6, 12.0, 3.9, 2.2 Hz, 1H), 2.67 (dddd, *J* = 19.6, 6.1, 4.5, 1.7 Hz, 1H), 1.29 (t, *J* = 7.1 Hz, 3H); <sup>13</sup>C NMR (125 MHz, CDCl<sub>3</sub>) δ 165.1, 137.9, 136.0, 132.2, 129.3, 129.1, 129.0, 128.2, 122.8, 114.3, 112.4, 61.1, 49.2, 45.9, 45.7, 28.8, 14.0; MS (MALDI) calcd for C<sub>19</sub>H<sub>18</sub>N<sub>2</sub>O<sub>2</sub>Na [M + Na]<sup>+</sup> 329.127, found 329.106.

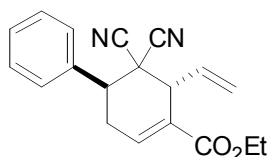

***trans*-Ethyl 5,5-Dicyano-4-phenyl-6-vinylcyclohex-1-enecarboxylate**

**(31)**. IR (film)  $\nu_{\max}$  3064, 3034, 2983, 2920, 2851, 2249, 1714, 1656, 1452, 1417, 1374, 1274, 1248, 1101, 1069, 1027, 761, 700 cm<sup>-1</sup>; <sup>1</sup>H NMR (500 MHz, CDCl<sub>3</sub>) δ 7.38–7.48 (m, 5H), 7.32 (dd, *J* = 4.7, 2.8 Hz, 1H), 6.10 (ddd, *J* = 17.0, 10.3, 6.5 Hz, 1H), 5.60 (d, *J* = 10.3 Hz, 1H), 5.33 (d, *J* = 17.0 Hz, 1H), 4.20–4.31 (m 2H), 4.19 (d, *J* = 6.7 Hz, 1H), 3.26 (dd, *J* = 11.6, 5.6 Hz, 1H), 2.95 (dddd, *J* = 20.4, 11.6, 2.6, 1.7 Hz, 1H), 2.74 (ddd, *J* = 20.4, 5.2, 5.2 Hz, 1H), 1.31 (t, *J* = 7.1 Hz, 3H); <sup>13</sup>C NMR (125 MHz, CDCl<sub>3</sub>)

$\delta$  164.5, 139.4, 136.0, 132.4, 129.3, 129.2, 128.3, 127.1, 123.6, 114.2, 113.3, 61.4, 45.6, 41.9, 40.7, 29.9, 14.1; MS (MALDI) calcd for  $C_{19}H_{19}N_2O_2$   $[M + H]^+$  307.145 found 307.145.

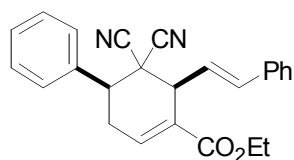

***cis*-Ethyl 5,5-Dicyano-4-phenyl-6-styrylcyclohex-1-enecarboxylate**

**(3m)**. 93% yield as a 91:9 mixture of *cis* and *trans* isomers: IR (film)  $\nu_{\max}$

3061, 3032, 2982, 2926, 2249, 1716, 1650, 1451, 1371, 1255, 1108,

1052, 1022, 967, 737, 697  $\text{cm}^{-1}$ ;  $^1\text{H}$  NMR (500 MHz,  $\text{CDCl}_3$ )  $\delta$  7.27–7.55 (m, 10H), 7.13–7.20

(m, 1H), 6.90 (d,  $J = 15.7$  Hz, 1H), 6.19 (dd,  $J = 15.6, 9.2$  Hz, 1H), 4.10–4.30 (m, 2H), 4.06 (d,  $J$

= 8.6 Hz, 1H), 3.35 (dd,  $J = 11.8, 4.4$  Hz, 1H), 3.0–3.2 (m, 1H), 2.7 (ddd,  $J = 19.5, 4.3, 4.3$  Hz,

1H), 1.24 (t,  $J = 7.1$  Hz, 3H);  $^{13}\text{C}$  NMR (125 MHz,  $\text{CDCl}_3$ )  $\delta$  165.1, 137.8, 137.4, 135.9, 135.7,

129.2, 129.1, 129.0, 128.5, 128.2, 128.1, 126.7, 122.8, 114.3, 112.4, 60.9, 48.6, 45.8, 45.7, 28.7,

14.0; MS (EI) calcd for  $C_{25}H_{22}N_2O_2$   $[M]^+$  382.2, found 382.2.

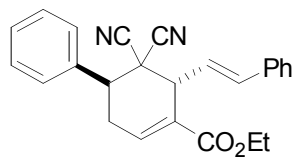

***trans*-Ethyl 5,5-Dicyano-4-phenyl-6-styrylcyclohex-1-enecarboxylate**

**(3m)**. IR (film)  $\nu_{\max}$  3060, 3031, 2981, 2925, 2853, 2247, 1713, 1653,

1494, 1450, 1374, 1276, 1248, 1097, 1026, 969, 757, 699  $\text{cm}^{-1}$ ;  $^1\text{H}$  NMR

(500 MHz,  $\text{CDCl}_3$ )  $\delta$  7.30–7.50 (m, 11H), 6.60 (d,  $J = 15.8$  Hz, 1H), 6.39 (dd,  $J = 15.8, 6.9$  Hz,

1H), 4.36 (d,  $J = 6.8$  Hz, 1H), 4.17–4.30 (m, 2H), 3.33 (dd,  $J = 11.7, 5.6$  Hz, 1H), 2.99 (dddd,  $J =$

20.5, 11.6, 2.5, 1.5 Hz, 1H), 2.80 (dt,  $J = 20.5, 5.2$  Hz, 1H), 1.30 (d,  $J = 7.1$  Hz, 3H);  $^{13}\text{C}$  NMR

(125 MHz,  $\text{CDCl}_3$ )  $\delta$  164.5, 139.4, 138.0, 136.0, 135.4, 129.3, 129.2, 128.74, 128.72, 128.3,

127.4, 126.9, 122.9, 114.2, 113.4, 61.4, 45.3, 42.4, 40.8, 29.9, 14.1; MS (EI) calcd for

$C_{25}H_{22}N_2O_2$   $[M]^+$  382.2, found 382.2.

## 6. Synthesis of Tetracycline 12

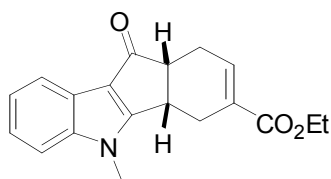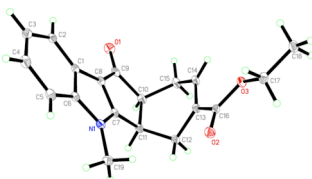

Aqueous hydrochloric acid (37%, 20 mL) was added over 2 min to a solution of the cyclohexene **4f** (1.00 mmol) in ethyl acetate (2 mL) at 0 °C, followed by the slow addition of sulfuric acid (1 mL). The solution was warmed slowly to room temperature and then heated under reflux. After the reaction had reached completion (ca. 2 h), the resulting mixture was cooled to 0 °C and diluted with water (10 mL). Aqueous sodium hydroxide (2 N) was added slowly until the pH of the solution reached 5. The combined mixture was extracted with ethyl acetate (2 × 100 mL). The combined organic phases were washed sequentially with water (20 mL) and brine (20 mL) and then dried (Na<sub>2</sub>SO<sub>4</sub>). After evaporation of the solvents, the crude product was identified as the hydrolysis/monodecarboxylation product of the malononitrile, i.e., the corresponding monocarboxylic acid. The crude mixture was dissolved in ethanol (40 mL) and then sulfuric acid (1 mL) was added slowly at 0 °C. The solution was heated under reflux until the reaction reached completion. After cooling the mixture to ambient temperature, the solvent was evaporated. The crude product was dissolved in ethyl acetate (30 mL), washed sequentially with water (10 mL), aqueous sodium hydroxide (10 mL, 0.2 N), saturated aqueous sodium bicarbonate (2 × 20 mL), and brine (10 mL), and then dried (Na<sub>2</sub>SO<sub>4</sub>). After evaporation of the solvents, the crude product was purified through flash column chromatography (silica gel, 70% ethyl acetate in hexane) to afford the fused tetracycline **12** (262 mg, 85%). IR (film)  $\nu_{\text{max}}$  2924, 2854, 1704, 1682, 1532, 1480, 1453, 1272, 1249, 1096 cm<sup>-1</sup>; <sup>1</sup>H NMR (500 MHz, CDCl<sub>3</sub>)  $\delta$  7.65 (d, *J* = 7.6 Hz, 1H), 7.24–7.35 (m, 3H), 7.16 (ddd, *J* = 6.2, 4.8, 1.4 Hz, 1H), 4.02–4.18 (m, 2H), 3.86 (s, 3H), 3.75 (td, *J* = 6.9, 4.9 Hz, 1H), 3.28 (td, *J* = 7.4, 4.7 Hz, 1H), 2.87 (dd, *J* = 15.2, 4.9

Hz, 1H), 2.69–2.82 (m, 2H), 2.51 (dddd,  $J = 15.9, 7.8, 4.7, 1.5$  Hz, 1H), 1.23 (t,  $J = 7.0$  Hz, 3H);  $^{13}\text{C}$  NMR (125 MHz,  $\text{CDCl}_3$ )  $\delta$  195.7, 168.0, 165.9, 143.4, 140.4, 130.5, 123.6, 122.4, 121.2, 121.1, 120.1, 110.1, 60.6, 51.0, 33.7, 31.0, 26.1, 25.2, 14.1; MS (MALDI) calcd for  $\text{C}_{19}\text{H}_{20}\text{N}_3\text{O}_2$   $[\text{M} + \text{H}]^+$  310.144, found 310.148.

## 7. $^1\text{H}$ and $^{13}\text{C}$ NMR Spectra of Products

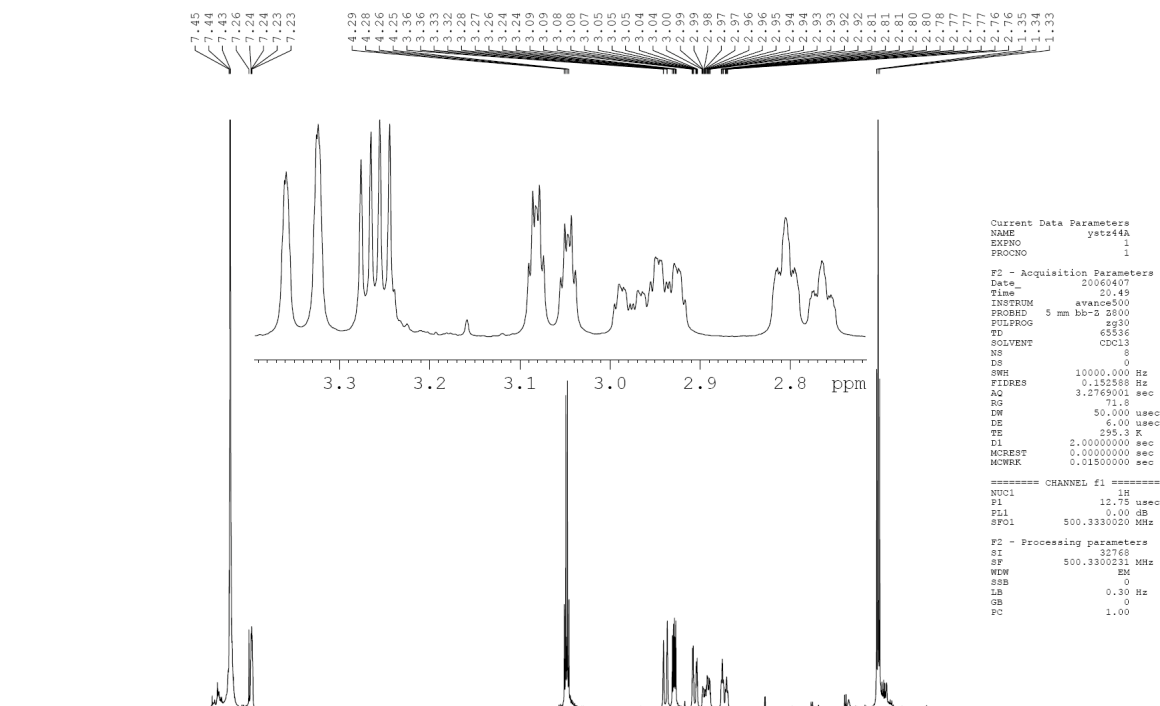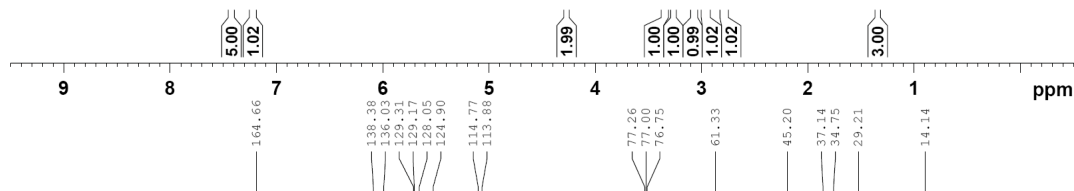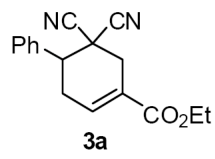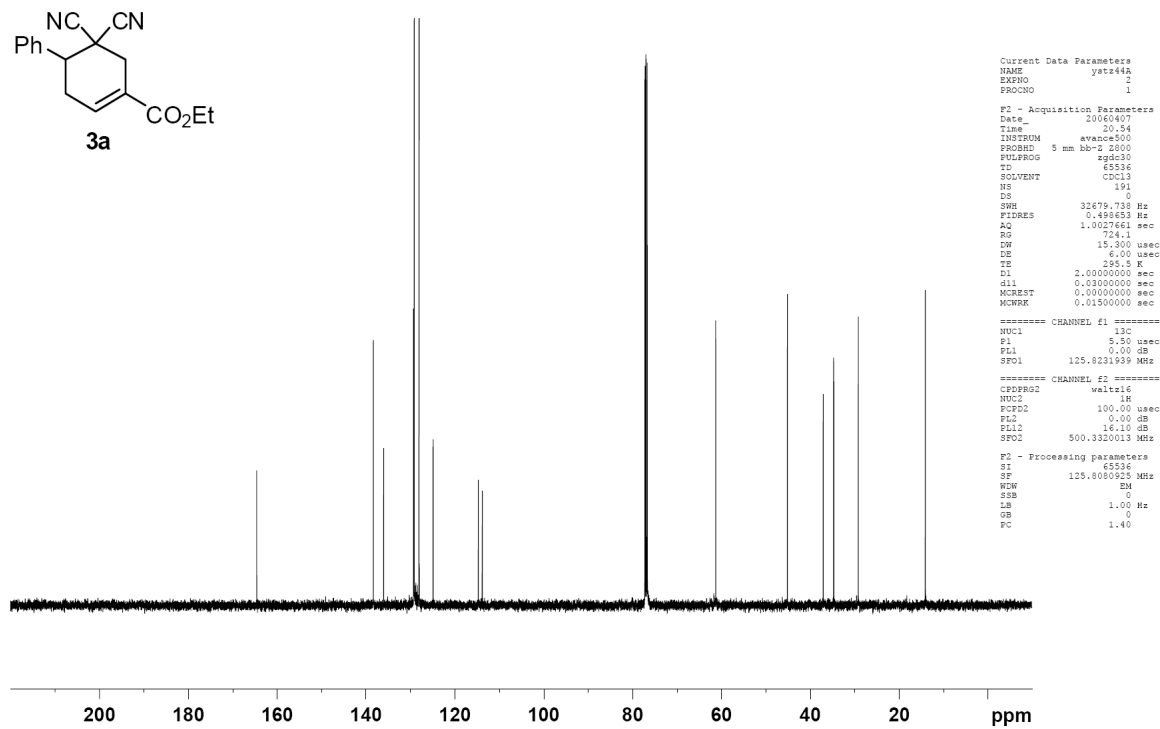

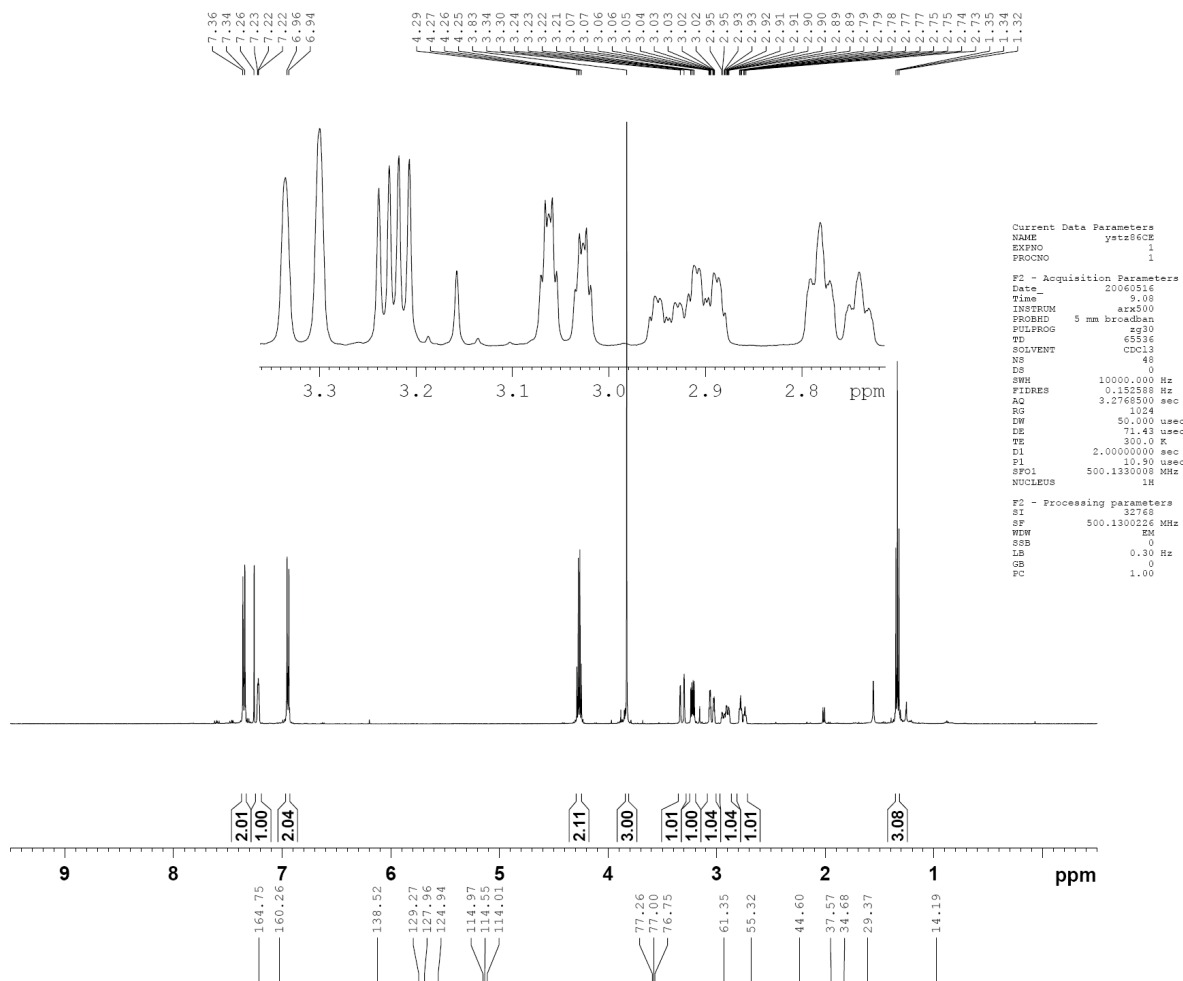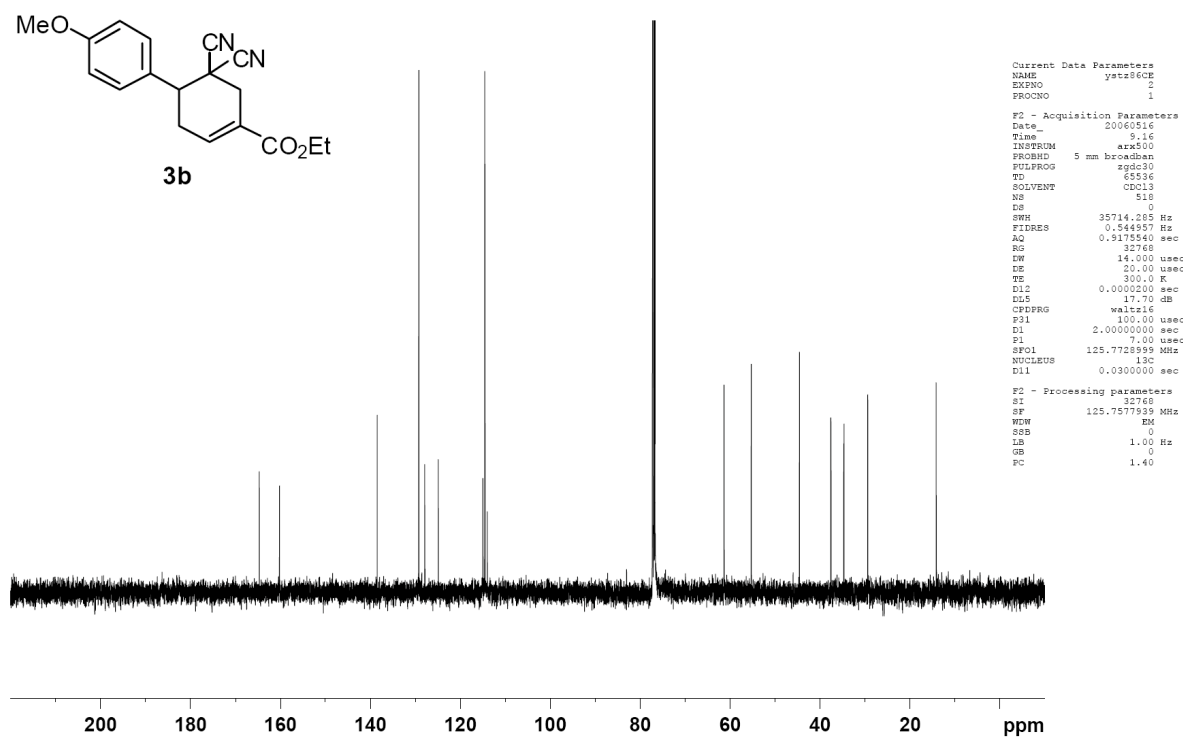



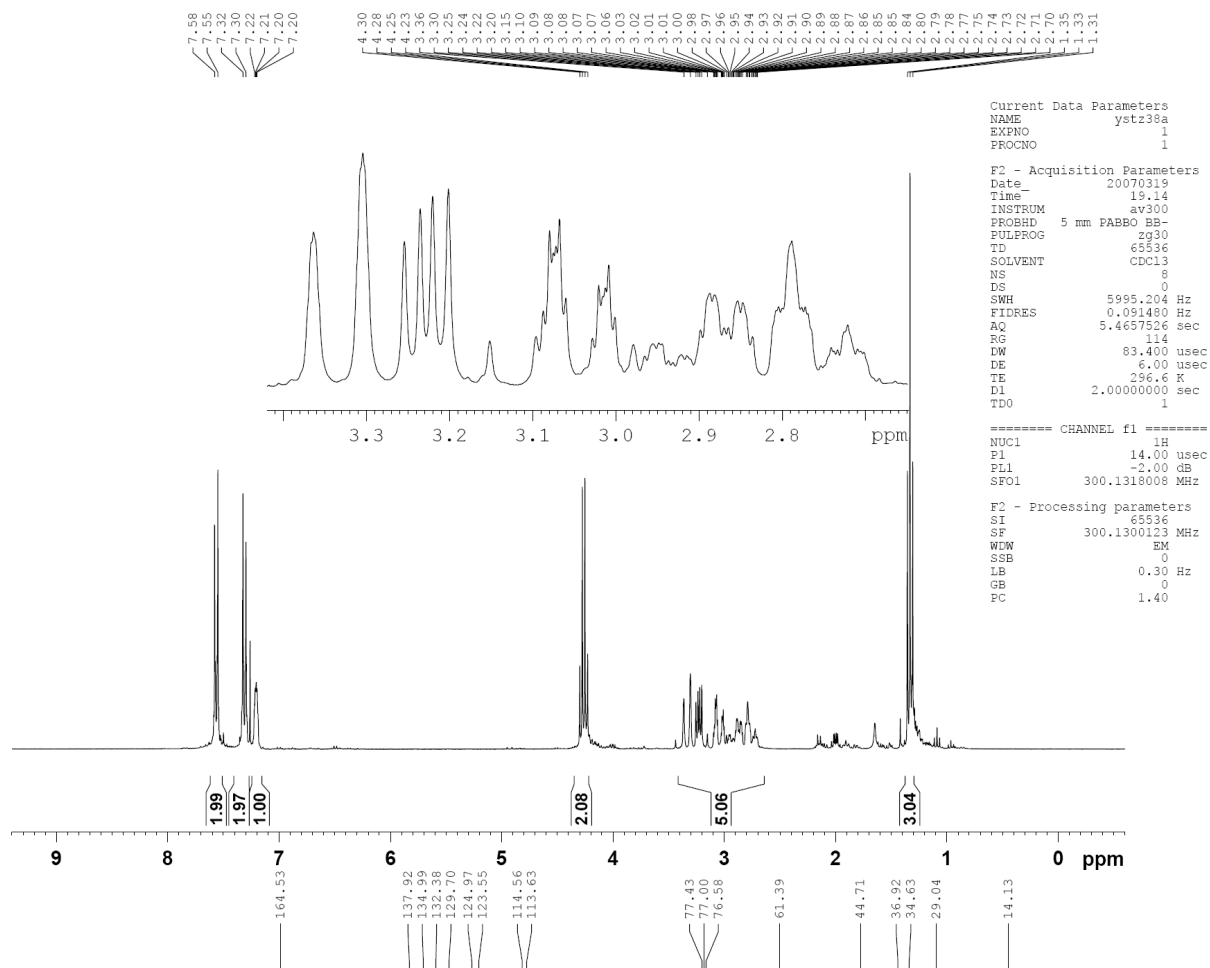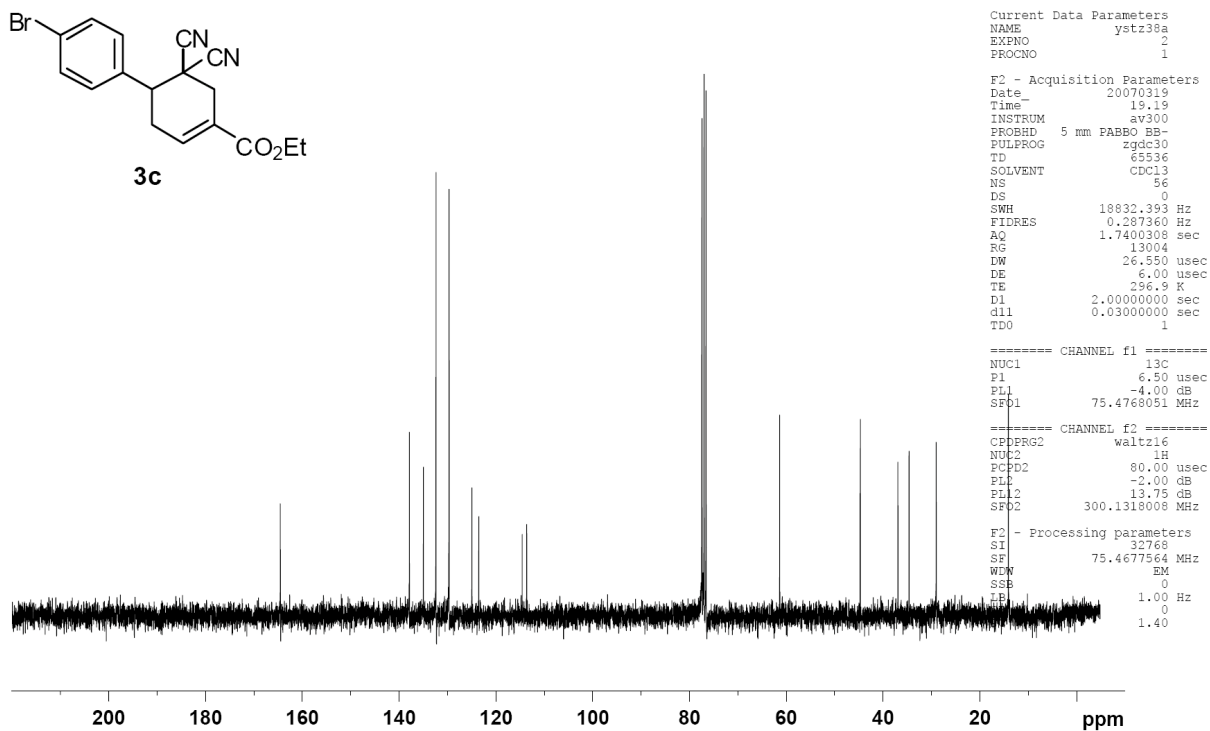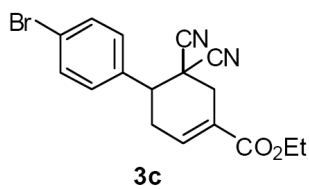

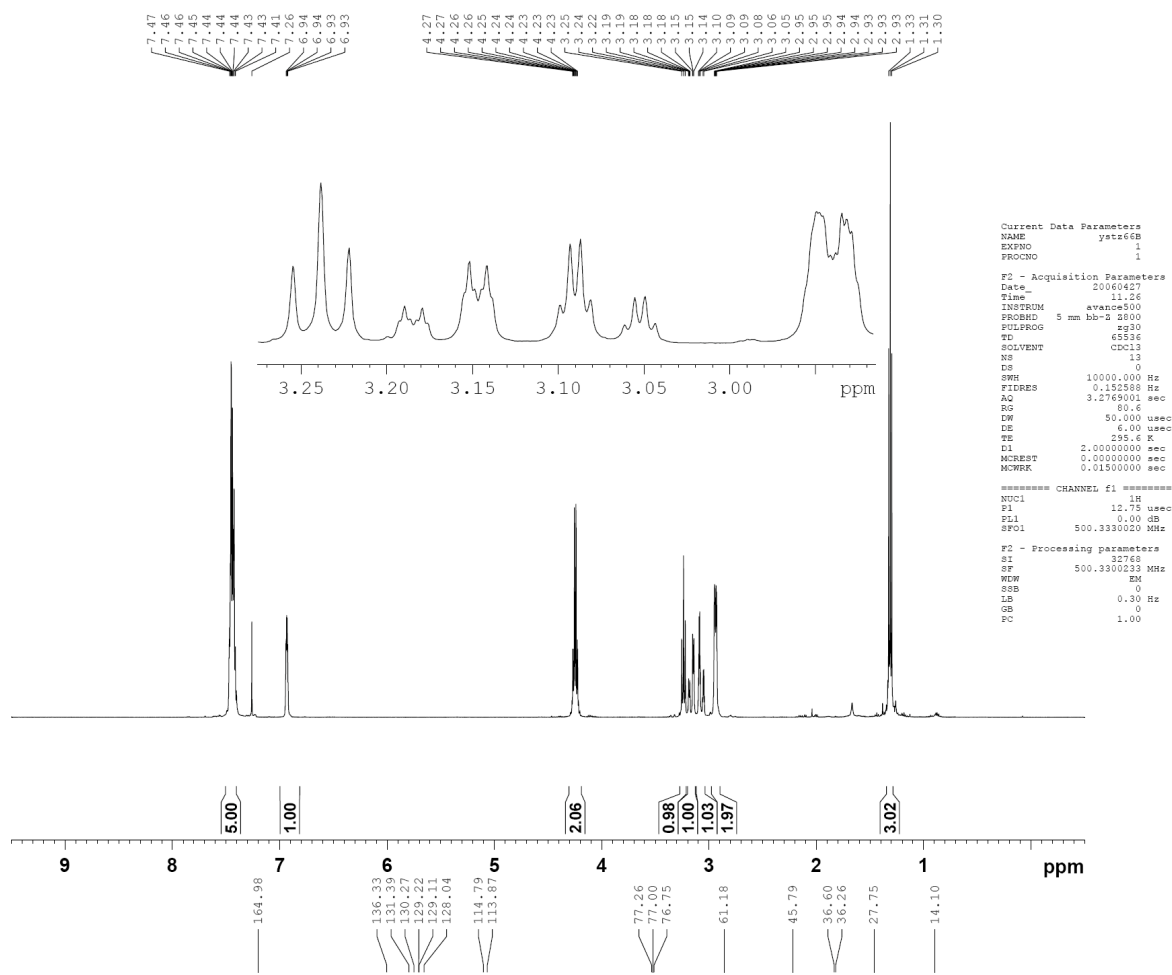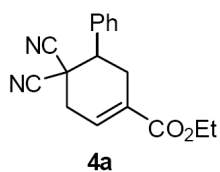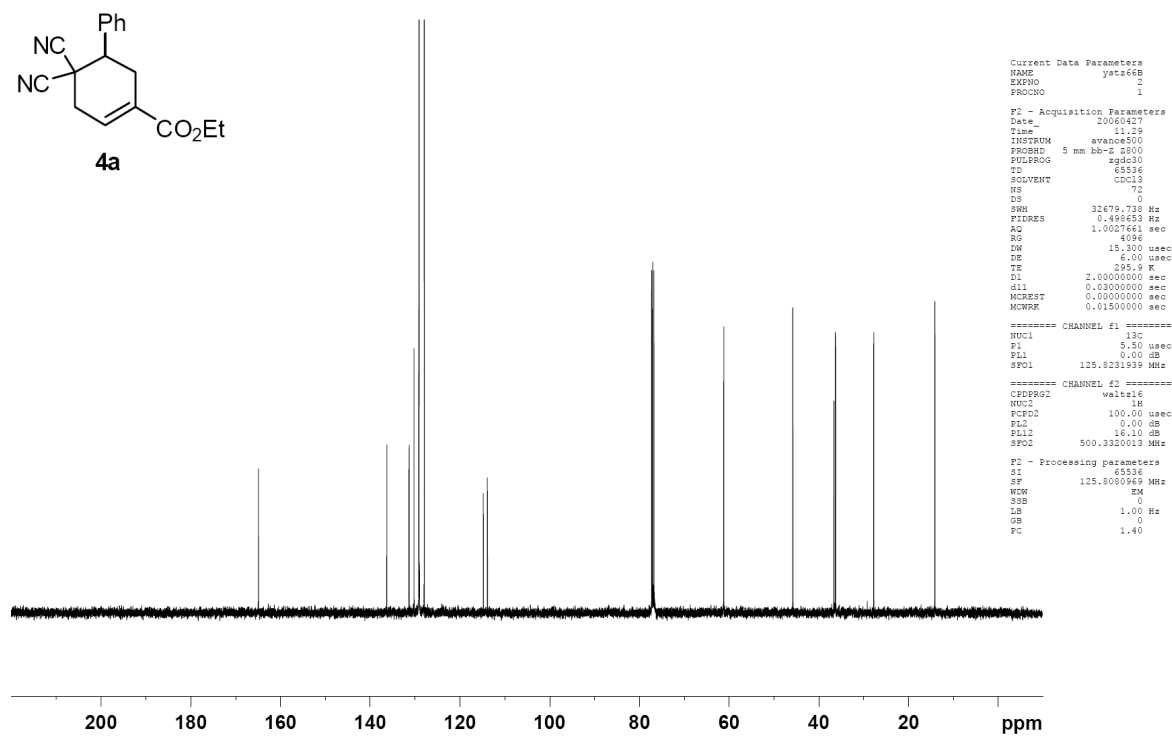

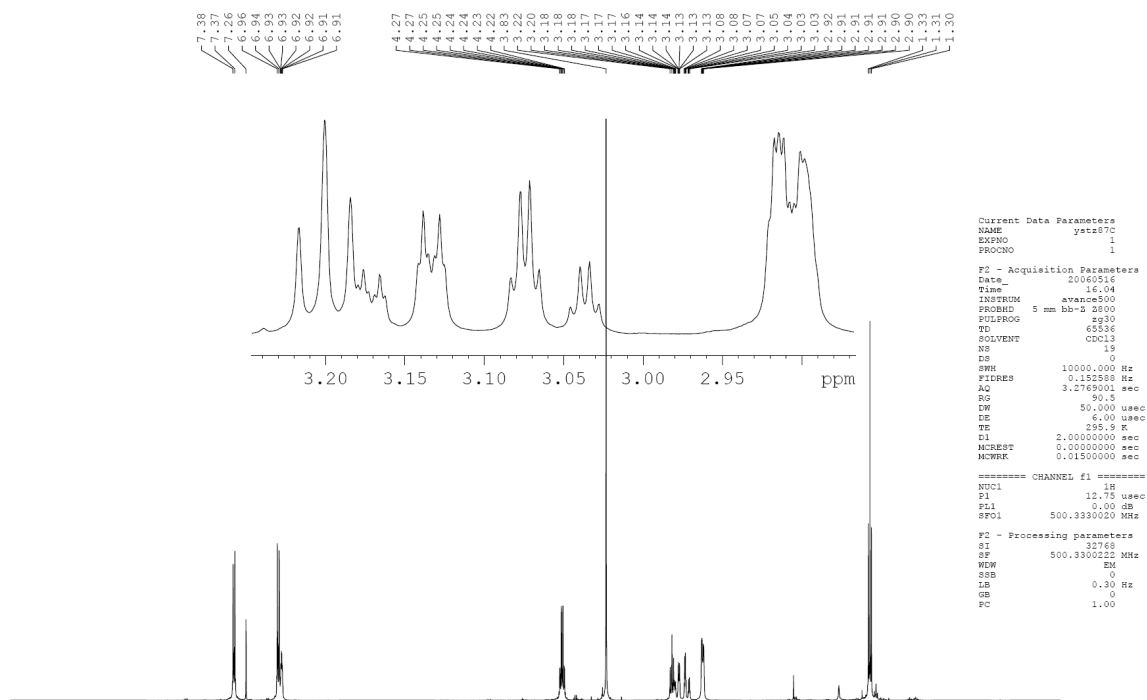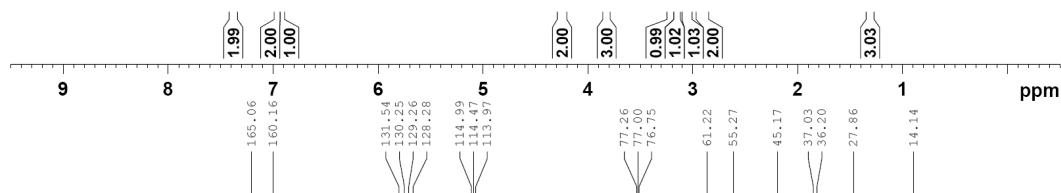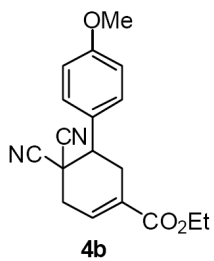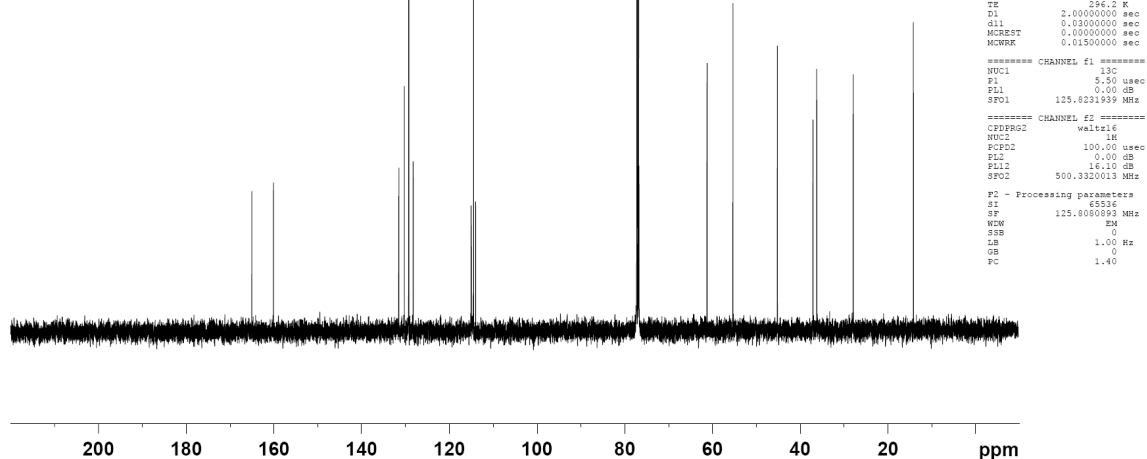

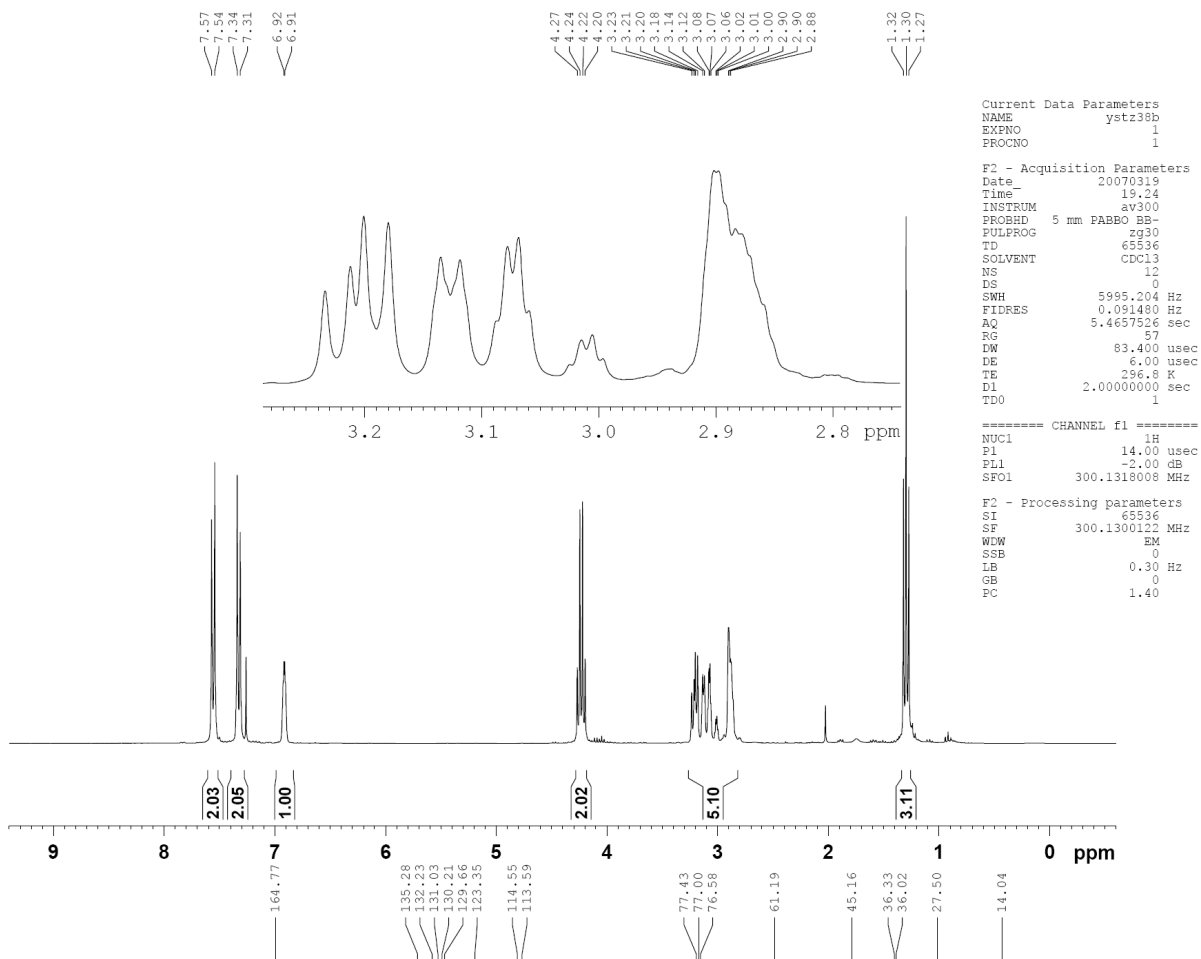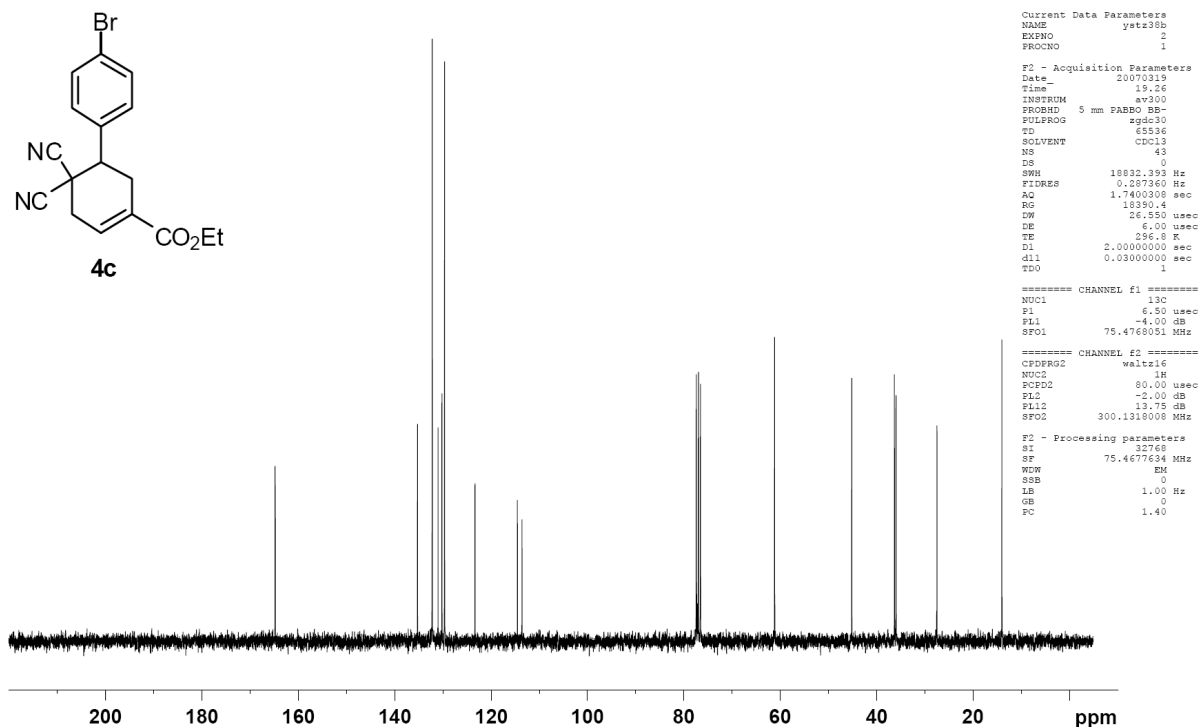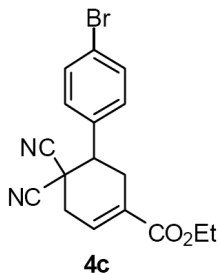

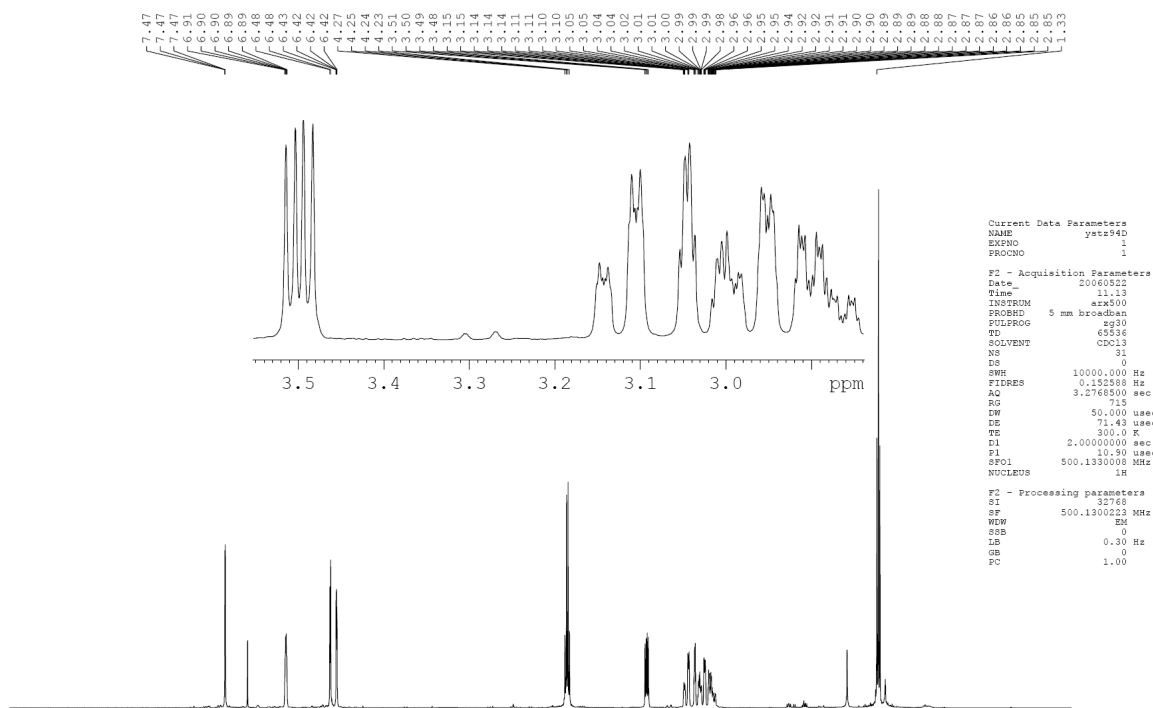

```

Current Data Parameters
NAME      ystz54D
EXPNO    1
PROCNO   1

F2 - Acquisition Parameters
Date_    20060522
Time     11.13
INSTRUM  ax500
PROBHD   5 mm broadband
PULPROG  zg30
TD        65536
SOLVENT  CDCl3
NS        31
DS        0
SWH       10000.000 Hz
FIDRES    0.152588 Hz
AQ         3.376890 sec
RG         715
SW         50.000 usec
DE         71.43 usec
TE         300.0 K
SI         2.0000000 sec
P1         10.90 usec
SFO1      500.1300000 MHz
NUCLEUS   1H

F2 - Processing Parameters
SI         32768
SF         500.1300223 MHz
WDW        EM
SSB        0
LB         0.30 Hz
GB         0
PC         1.00
    
```

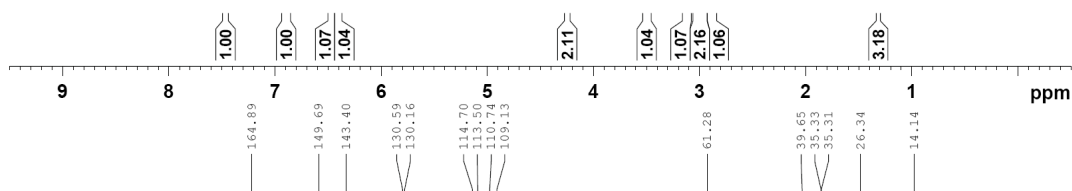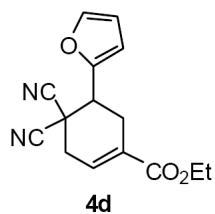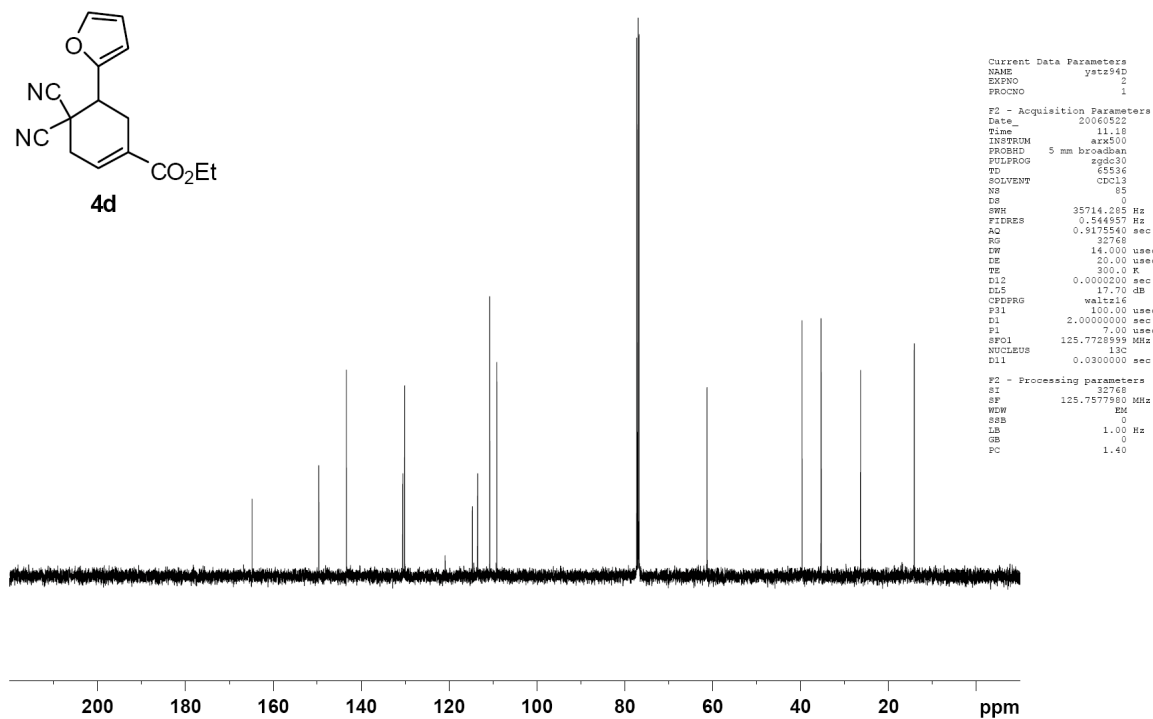

```

Current Data Parameters
NAME      ystz54D
EXPNO    1
PROCNO   1

F2 - Acquisition Parameters
Date_    20060522
Time     11.18
INSTRUM  ax500
PROBHD   5 mm broadband
PULPROG  zg30
TD        65536
SOLVENT  CDCl3
NS        35
DS        0
SWH       35714.000 Hz
FIDRES    0.544857 Hz
AQ         0.9175540 sec
RG         32768
SW         14.000 usec
DE         20.00 usec
TE         300.0 K
SI         0.0000200 sec
D12        17.70 dB
CPCPRG    waltz16
F31        100.00 usec
SI         2.0000000 sec
P1         7.00 usec
SFO1      125.7728999 MHz
NUCLEUS   13C
D11        0.0300000 sec

F2 - Processing Parameters
SI         32768
SF         125.7577999 MHz
WDW        EM
SSB        0
LB         1.00 Hz
GB         0
PC         1.40
    
```

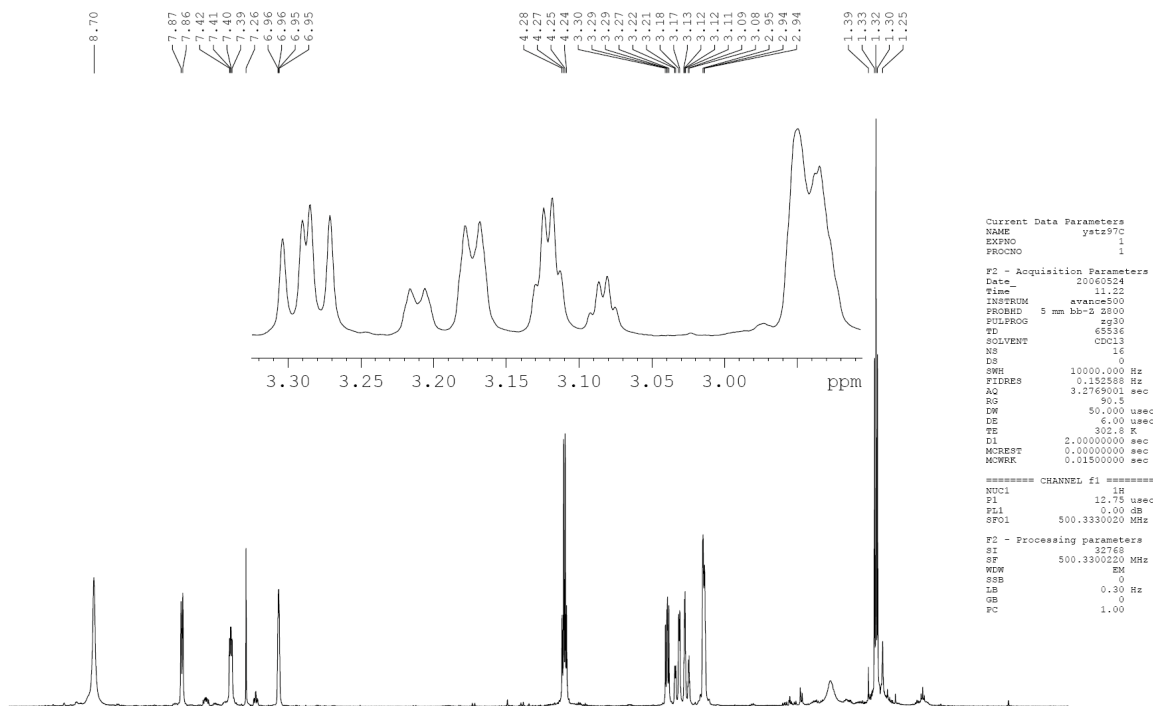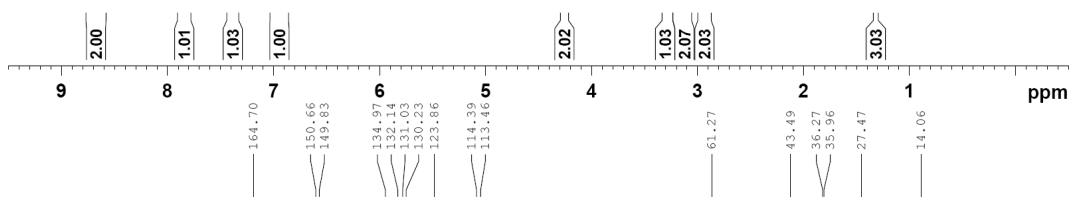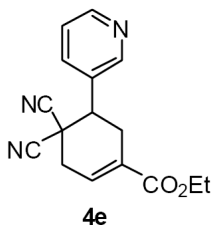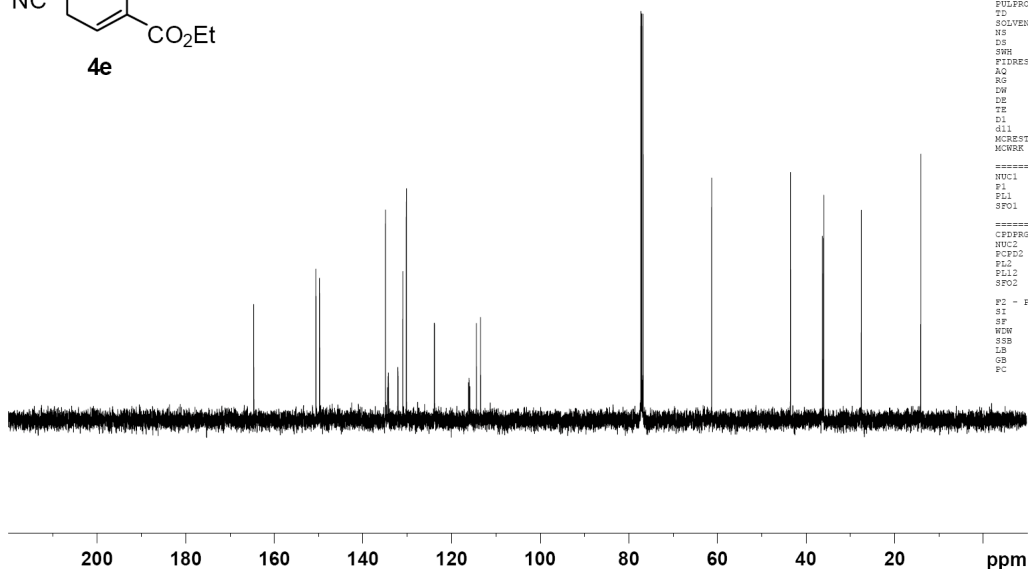

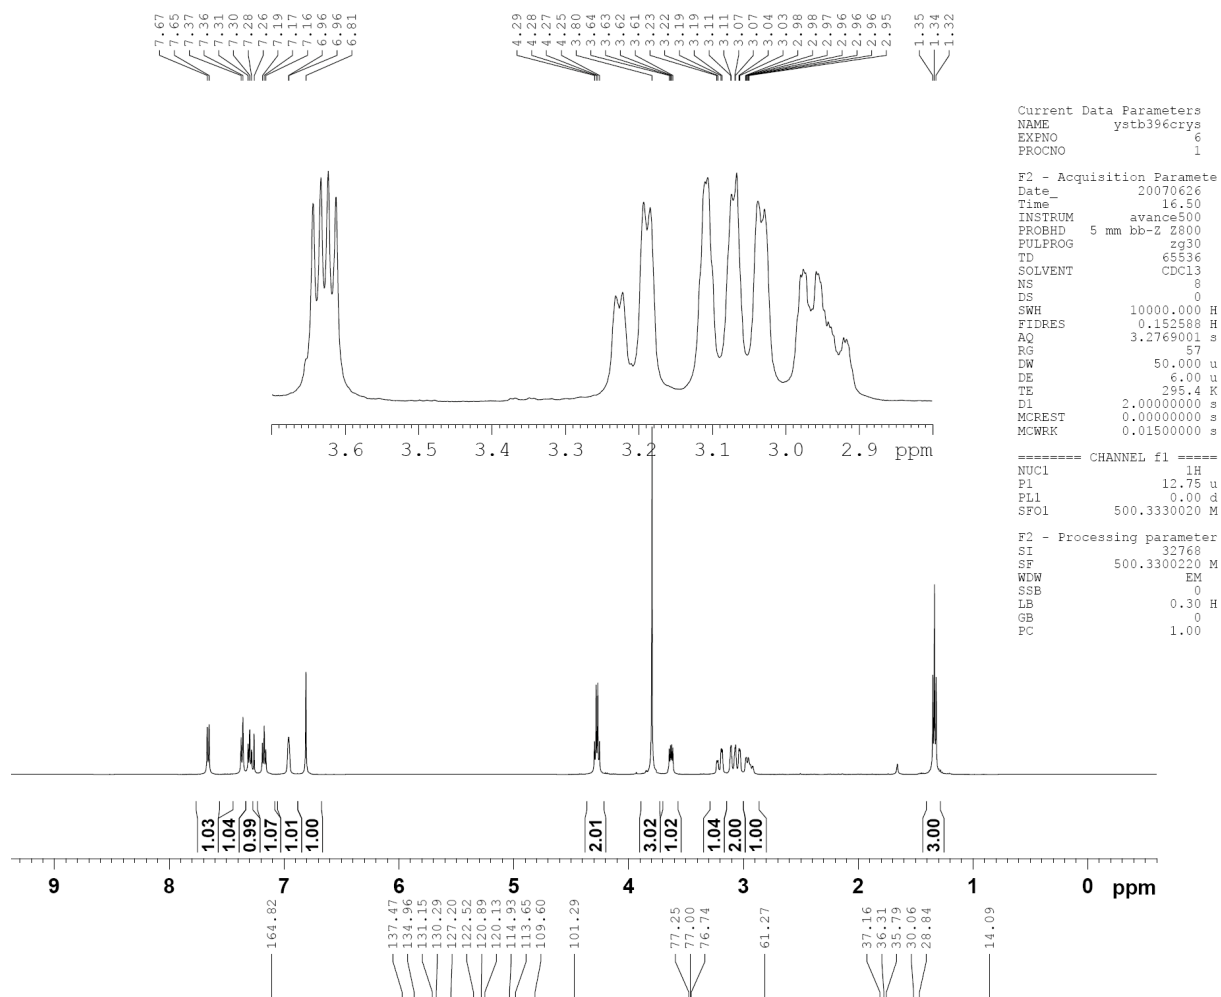

Current Data Parameters  
 NAME ystb396cr3s  
 EXPNO 6  
 PROCNO 1  
 F2 - Acquisition Paramete  
 Date\_ 20070626  
 Time 16.50  
 INSTRUM avance500  
 PROBHD 5 mm bb-2 Z800  
 PULPROG zg30  
 TD 65536  
 SOLVENT CDCl3  
 NS 8  
 DS 0  
 SWH 10000.000 H  
 FIDRES 0.152588 H  
 AQ 3.2769001 s  
 RG 57  
 DW 50.000 u  
 DE 6.00 u  
 TE 295.4 K  
 DL 2.00000000 s  
 MCREST 0.00000000 s  
 MCWRK 0.01500000 s

===== CHANNEL f1 =====  
 NUC1 1H  
 P1 12.75 u  
 PL1 0.00 d  
 SF01 500.330020 M

F2 - Processing parameter  
 SI 32768  
 SF 500.3300220 M  
 WDW EM  
 SSB 0  
 LB 0.30 H  
 GB 0  
 PC 1.00

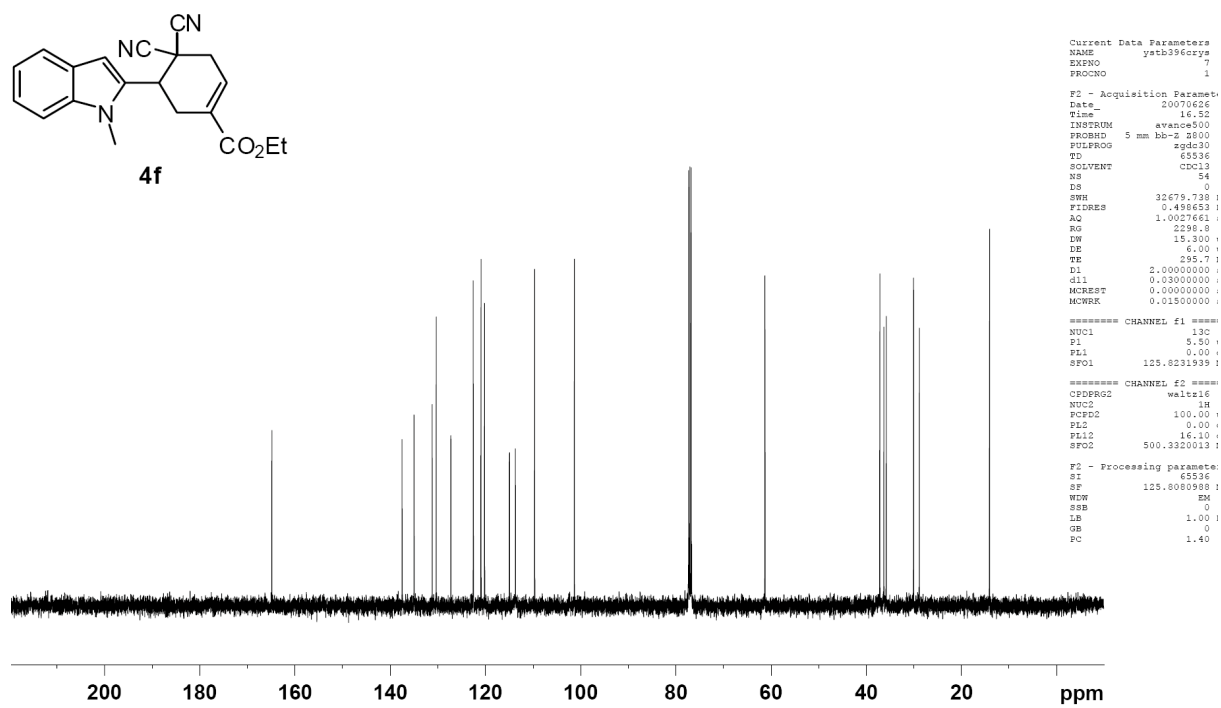

Current Data Parameters  
 NAME ystb396cr3s  
 EXPNO 7  
 PROCNO 1  
 F2 - Acquisition Paramete  
 Date\_ 20070626  
 Time 16.52  
 INSTRUM avance500  
 PROBHD 5 mm bb-2 Z800  
 PULPROG zgdc30  
 TD 65536  
 SOLVENT cdcl3  
 NS 54  
 DS 0  
 SWH 32679.739 H  
 FIDRES 0.458652 H  
 AQ 1.0027561 s  
 RG 2298.8  
 DW 15.300 u  
 DE 6.00 u  
 TE 295.7 K  
 DL 2.00000000 s  
 dl1 0.03000000 s  
 MCREST 0.00000000 s  
 MCWRK 0.01500000 s

===== CHANNEL f1 =====  
 NUC1 13C  
 P1 5.50 u  
 PL1 0.00 d  
 SF01 125.8231935 M

===== CHANNEL f2 =====  
 NUC2 1H  
 PCF02 100.00 u  
 PL2 0.00 d  
 PL12 16.10 u  
 SF02 500.3320013 M

F2 - Processing parameter  
 SI 65536  
 SF 125.8080998 M  
 WDW EM  
 SSB 0  
 LB 1.00 H  
 GB 0  
 PC 1.40

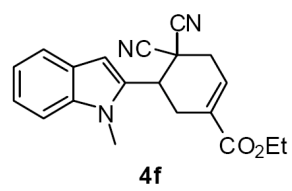

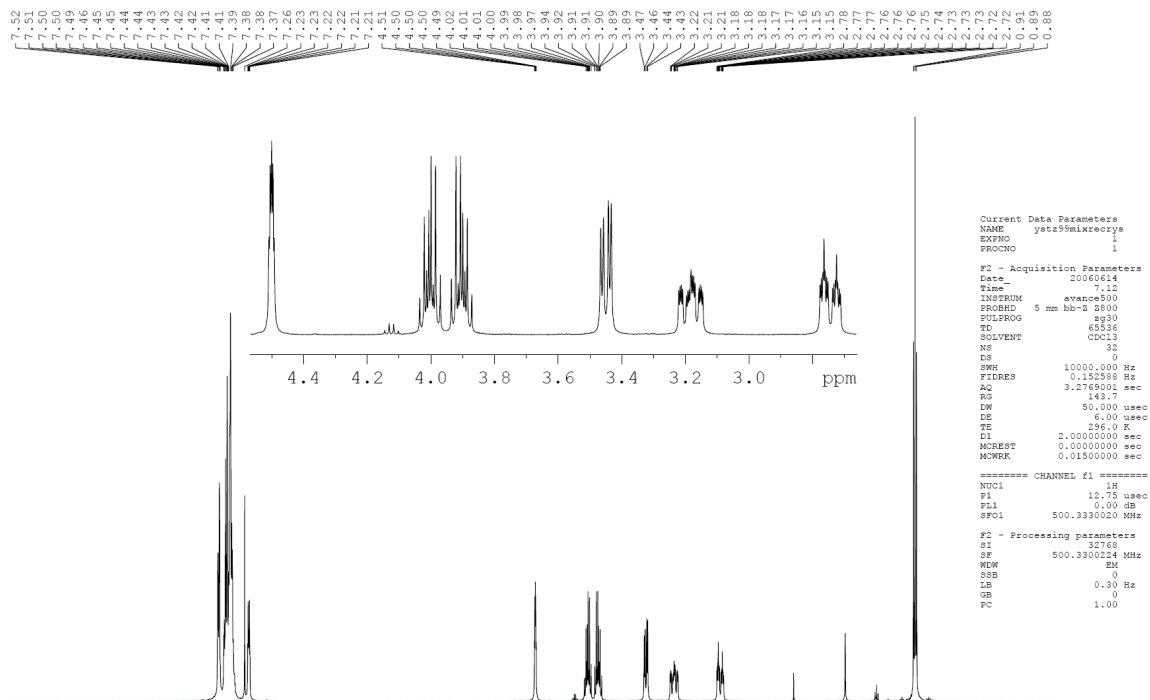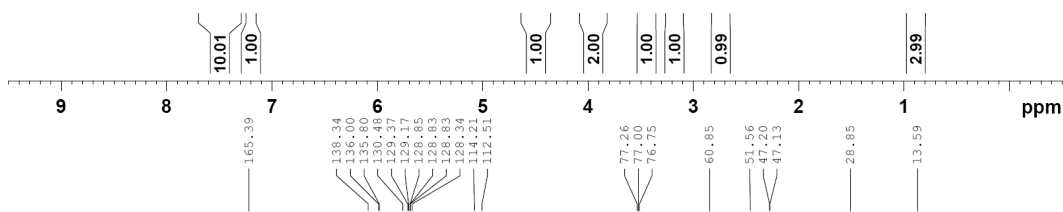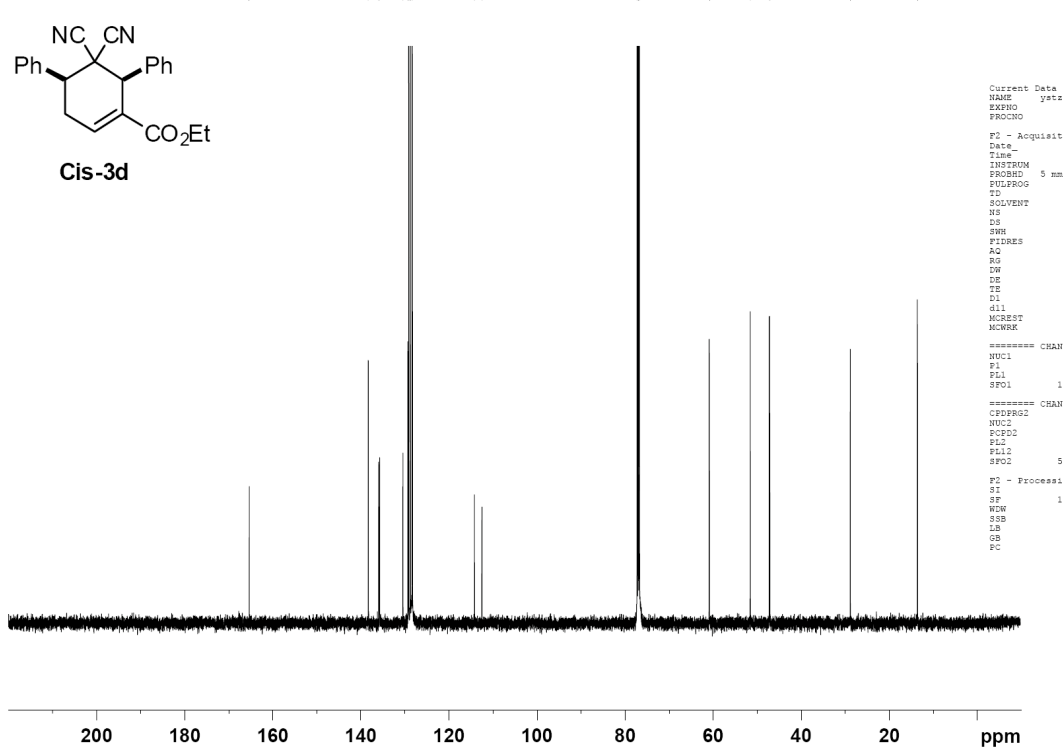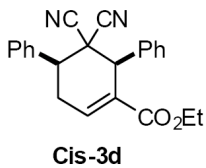



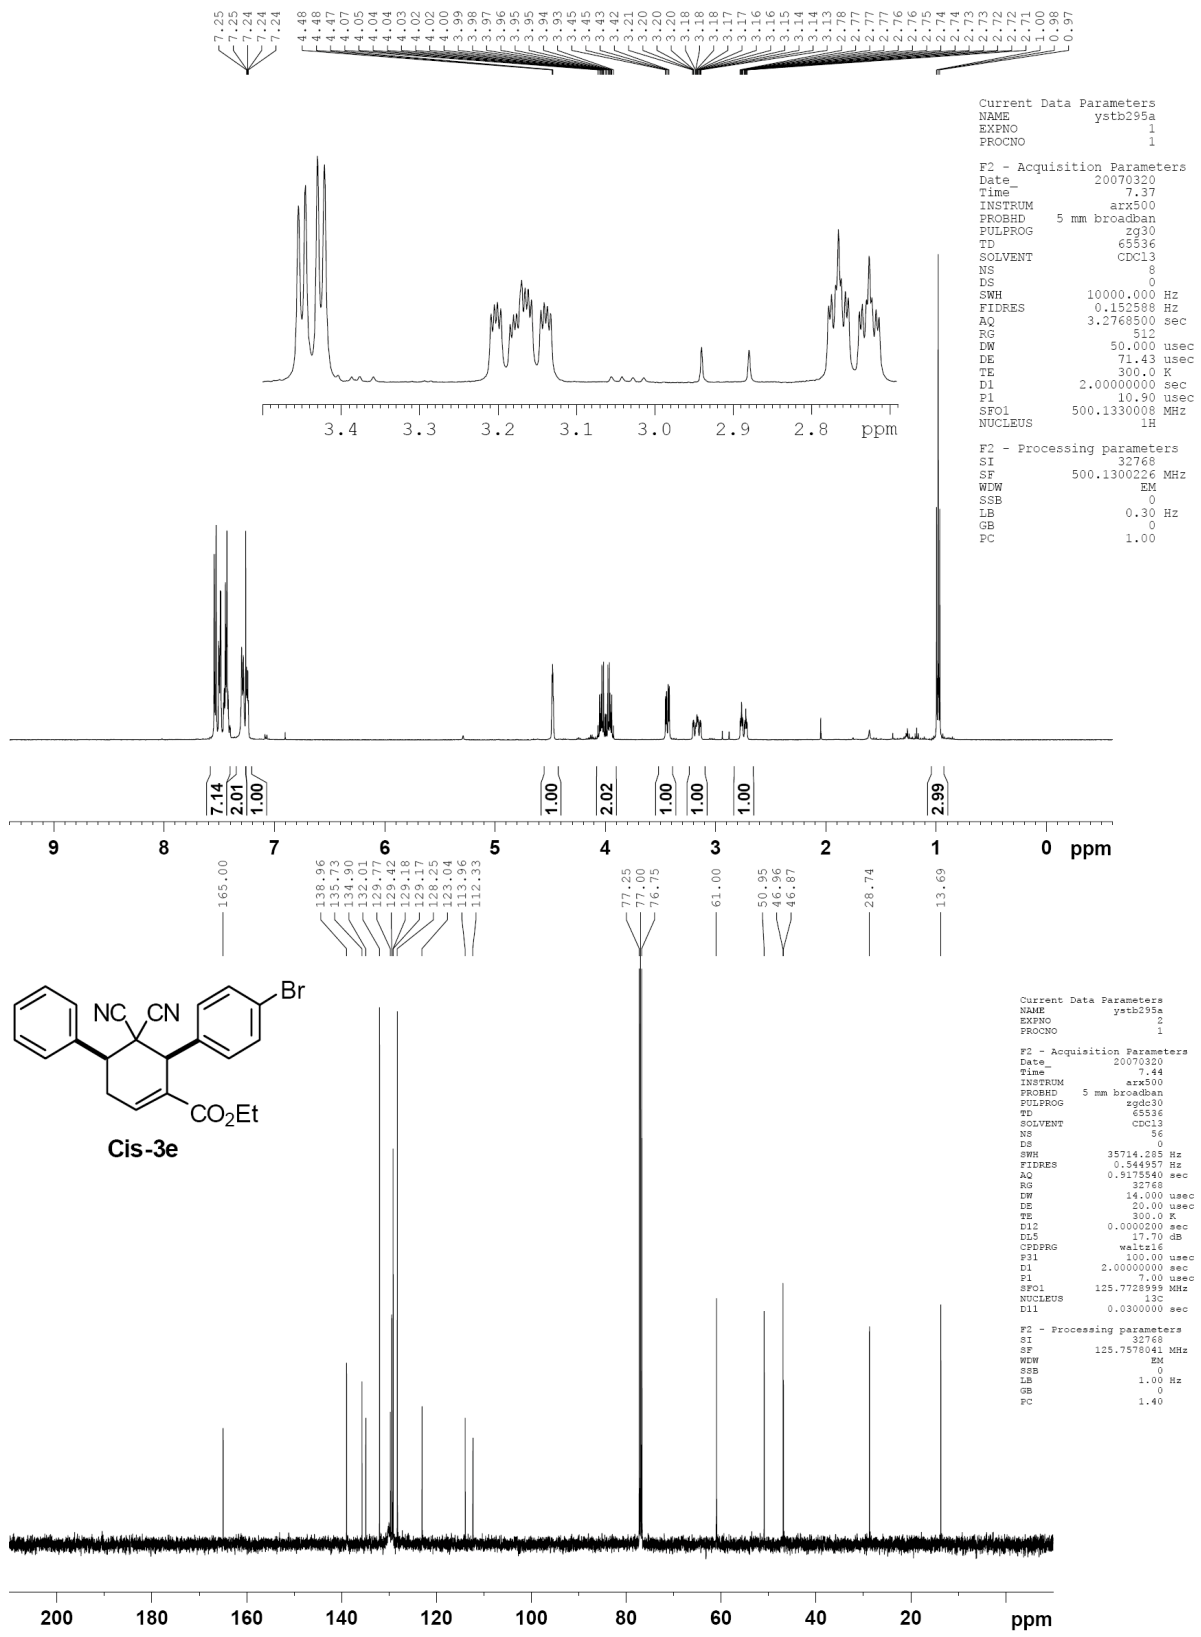

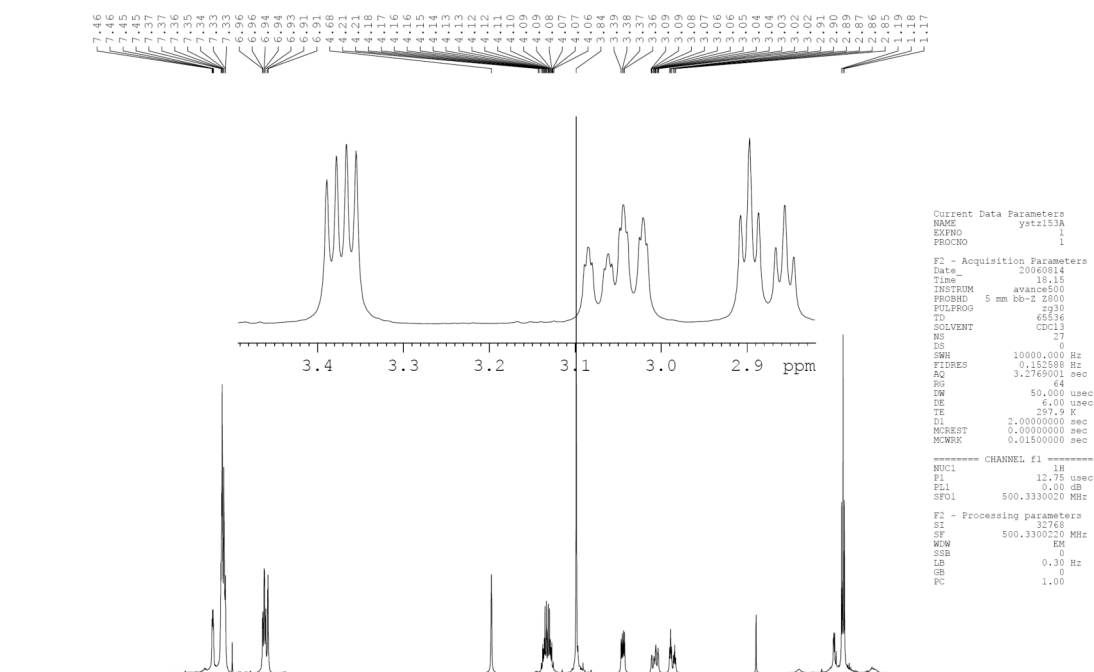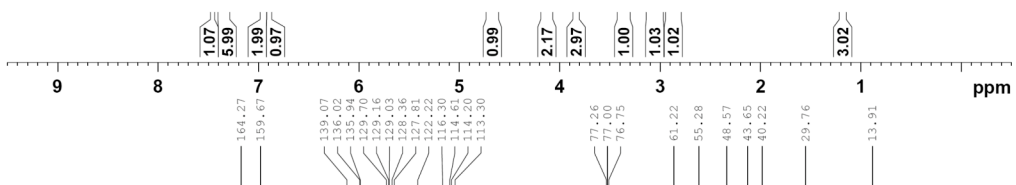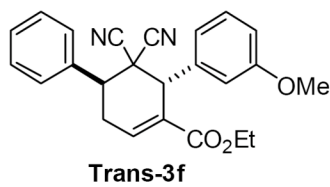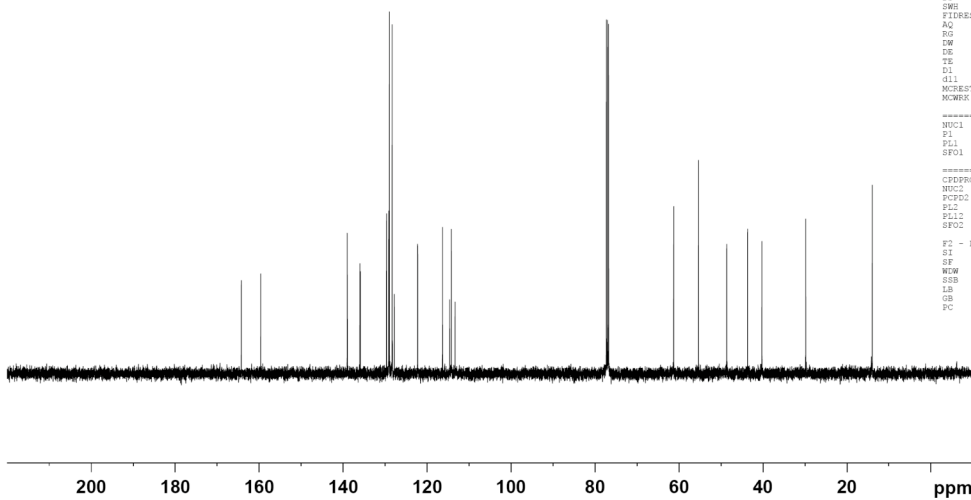

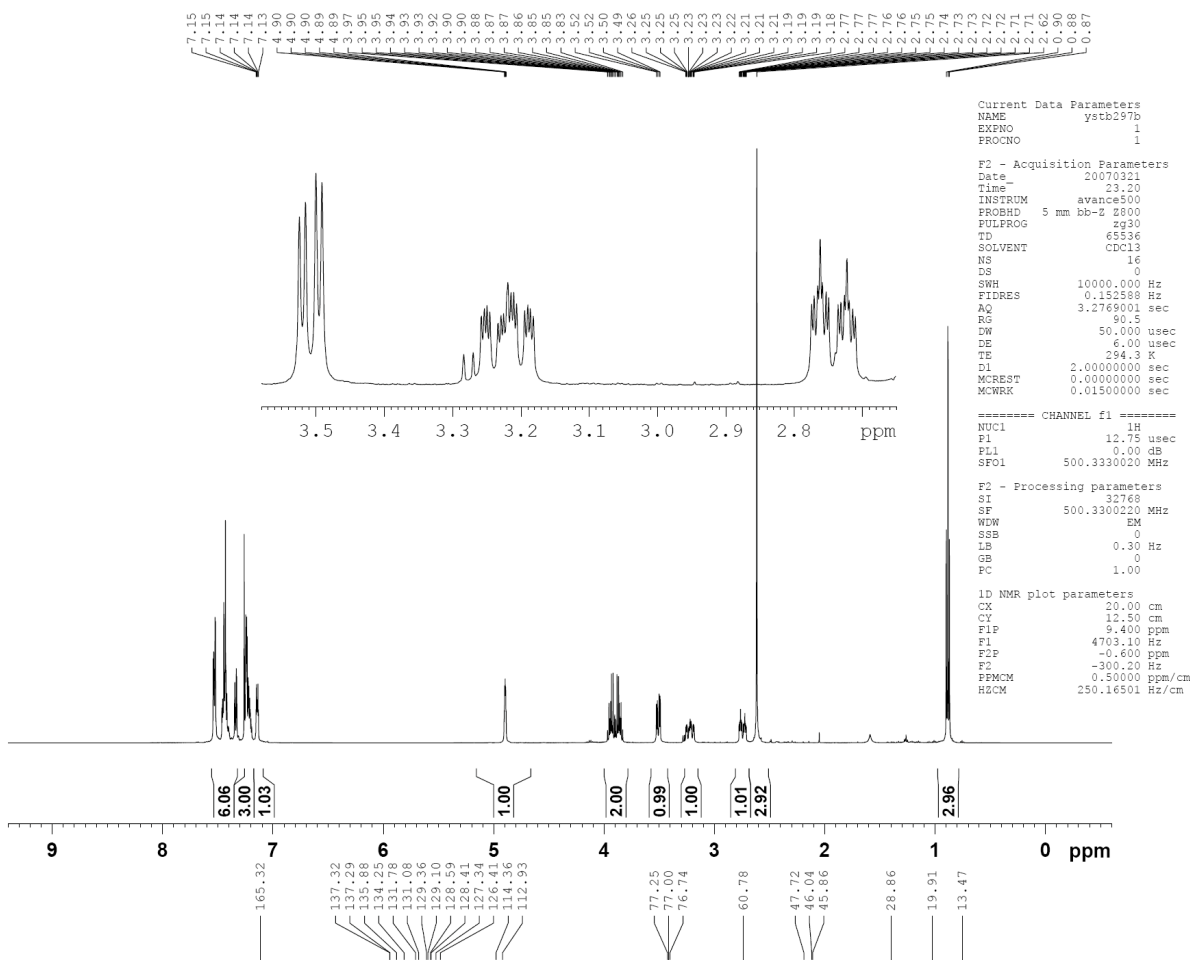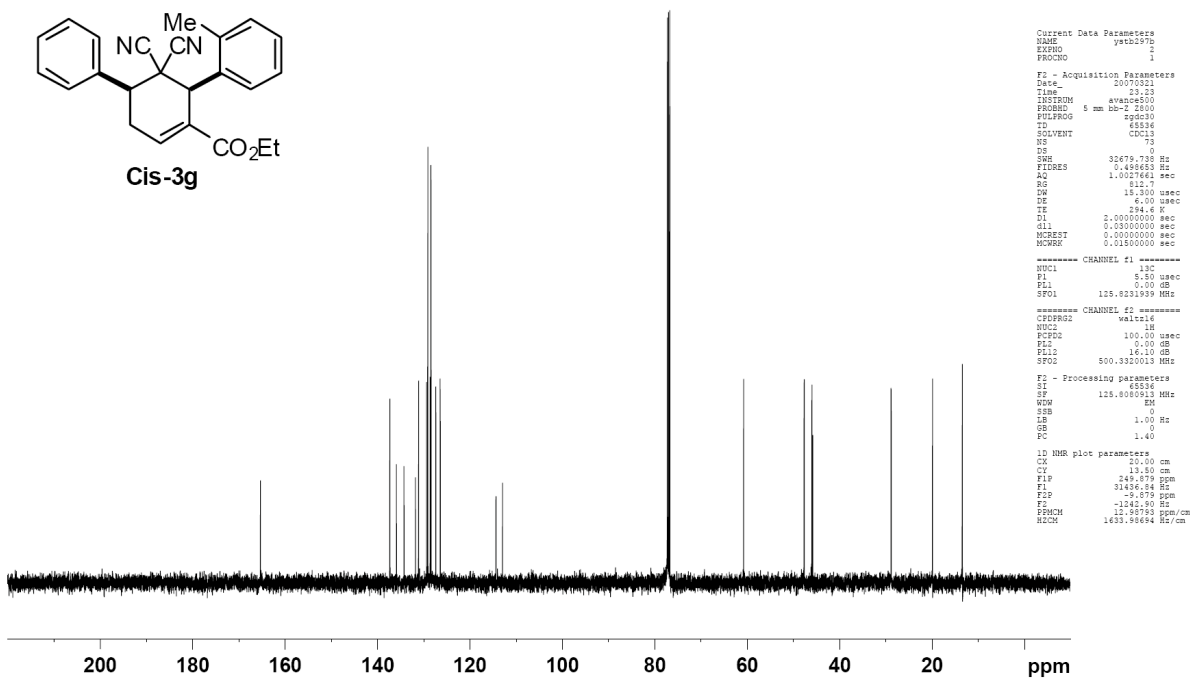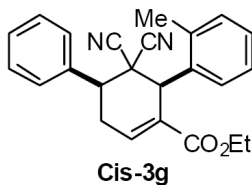

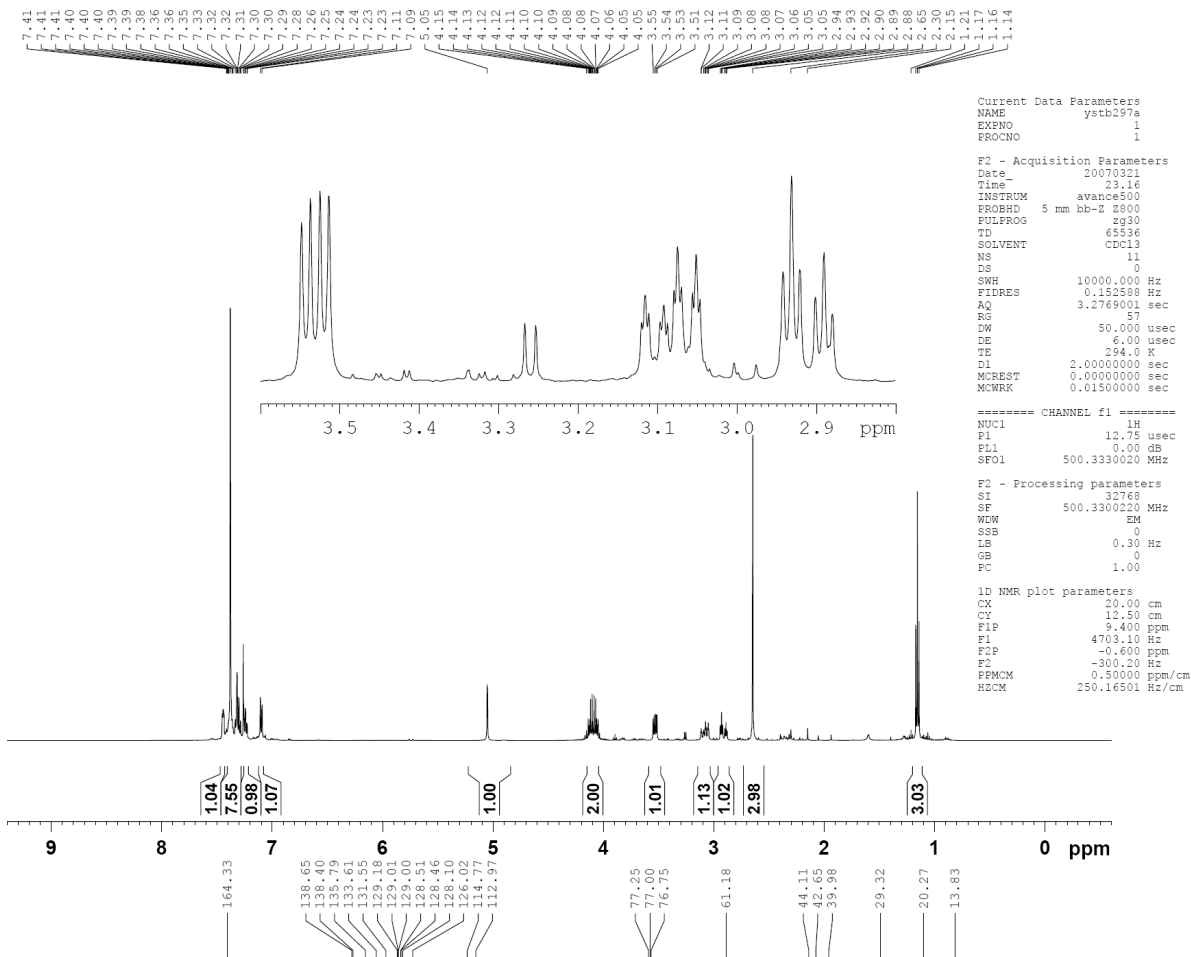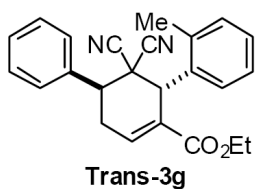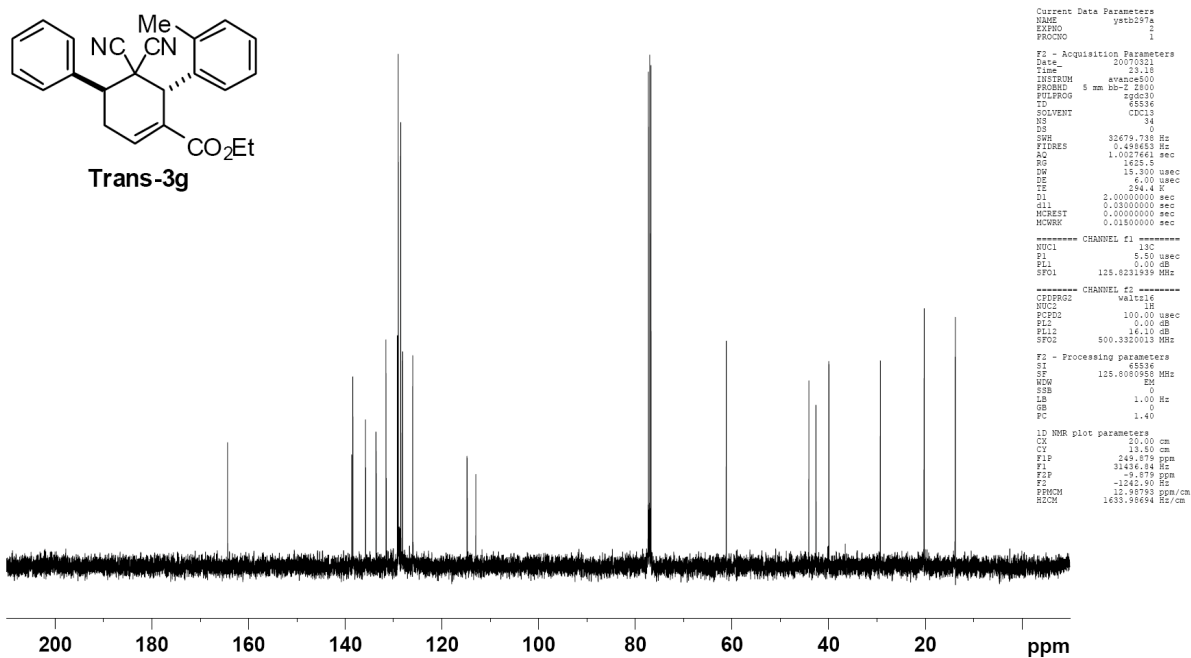

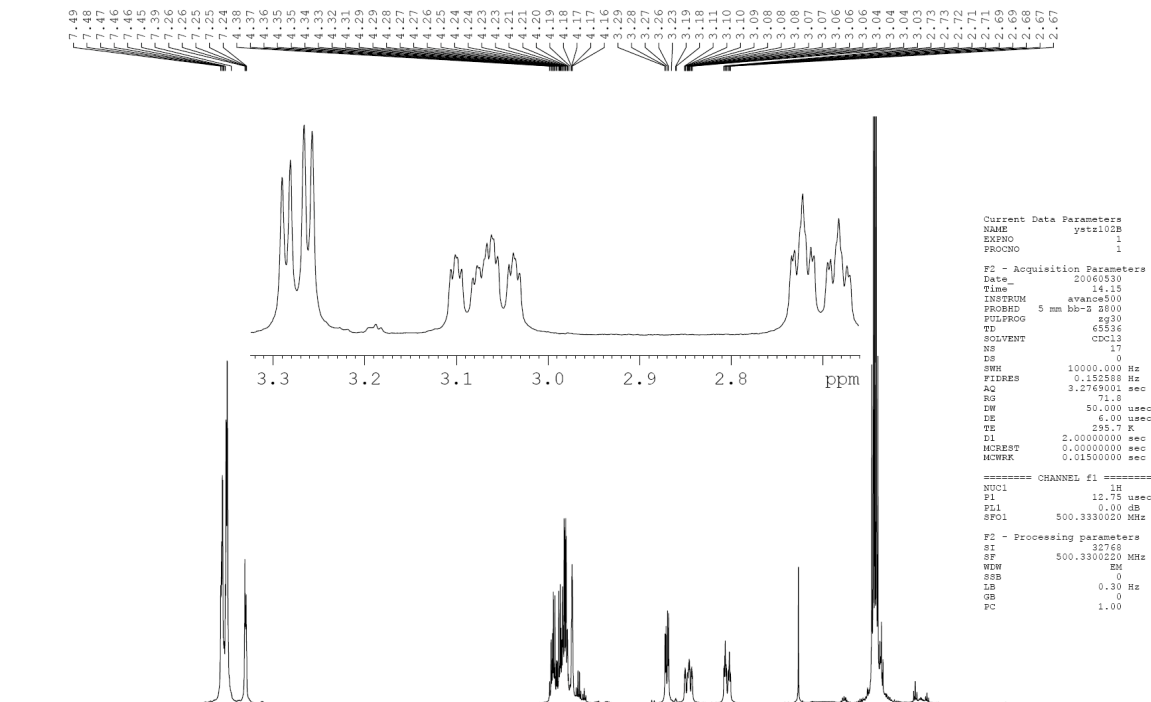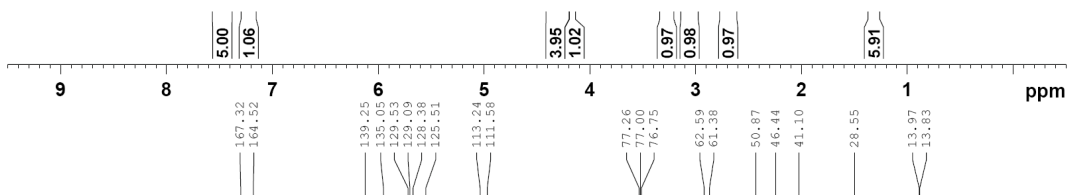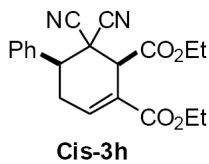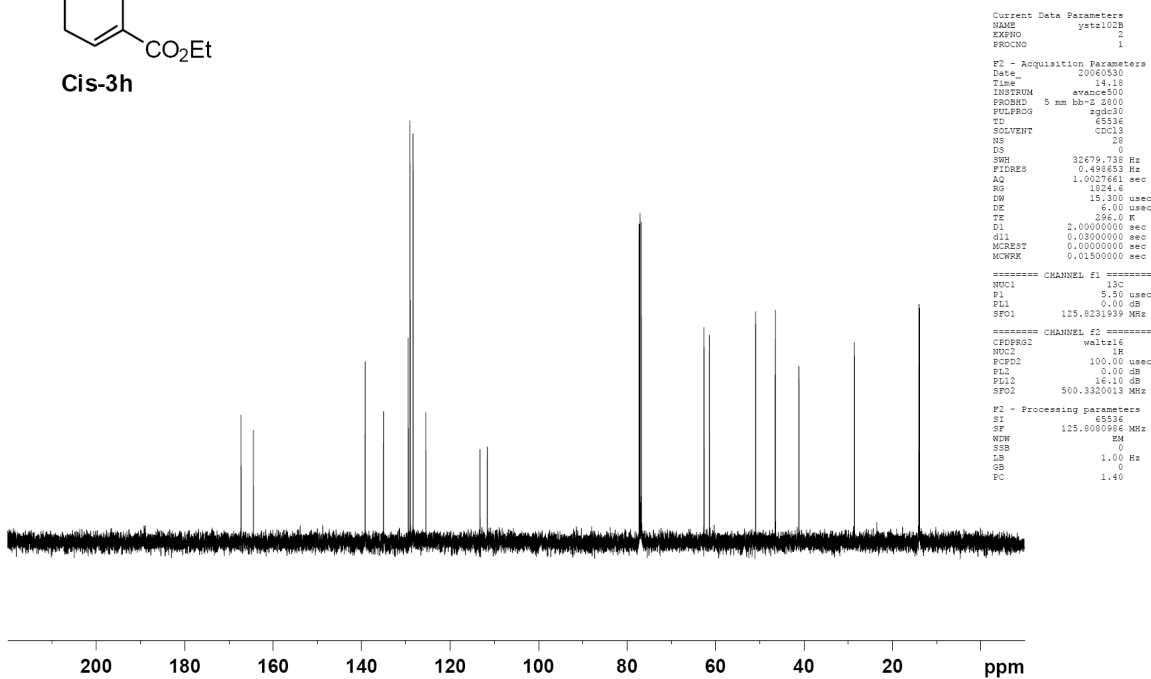

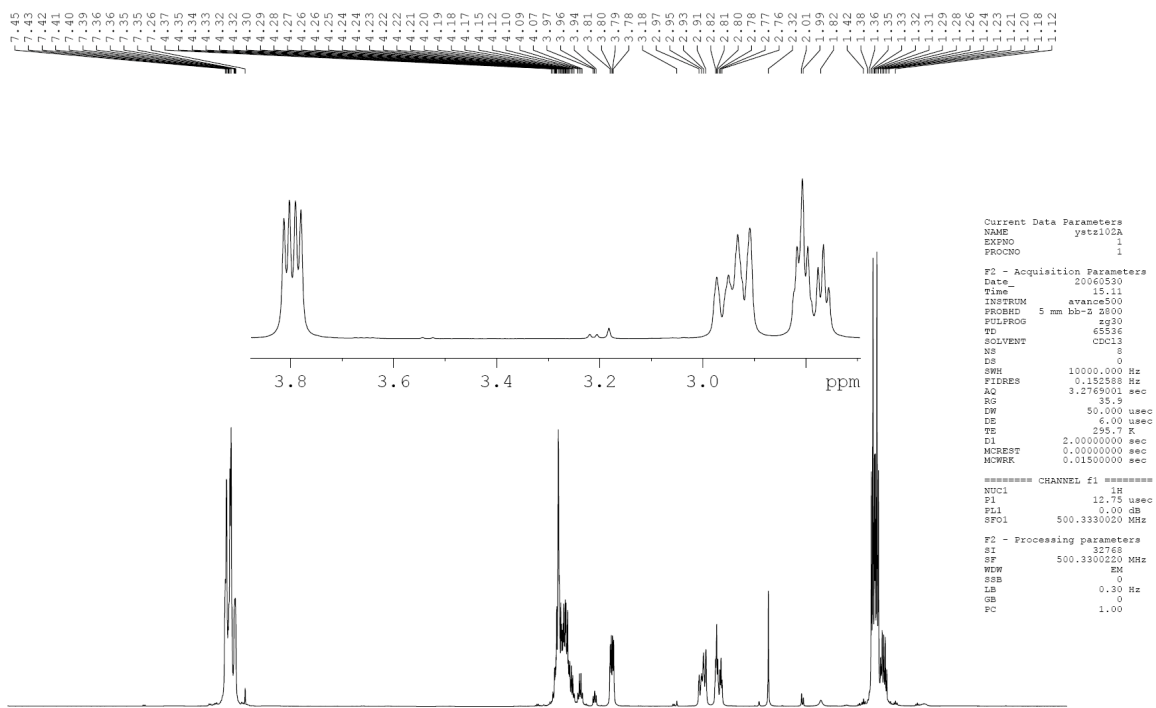

```

Current Data Parameters
NAME      ystzi02A
EXPNO    1
PROCNO   1

F2 - Acquisition Parameters
Date_    20060530
Time     15.11
INSTRUM  avance500
PROBHD   5 mm bb-2 z800
PULPROG  zgpg30
TD       65536
SOLVENT  CDCl3
NS       8
DS       0
SWH      10000.000 Hz
FIDRES   0.152588 Hz
AQ       3.2769001 sec
RG       35.9
DW       50.000 usec
DE       6.00 usec
TE       296.3 K
D1       2.00000000 sec
MCREST   0.00000000 sec
MCWRK    0.01500000 sec

===== CHANNEL f1 =====
NUC1      1H
P1        12.75 usec
PL1       0.00 dB
SFO1      500.3330020 MHz

F2 - Processing parameters
SI        32768
SF        500.3300220 MHz
WDW       EM
SSB       0
LB        0.30 Hz
GB        0
PC        1.00
    
```

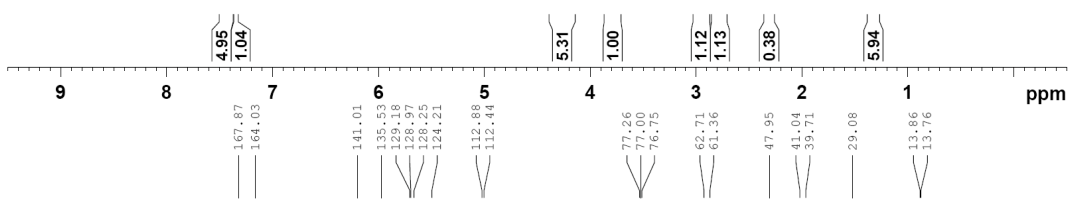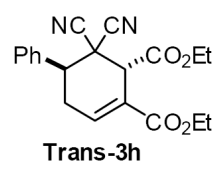

```

Current Data Parameters
NAME      ystzi02A
EXPNO    2
PROCNO   1

F2 - Acquisition Parameters
Date_    20060530
Time     15.14
INSTRUM  avance500
PROBHD   5 mm bb-2 z800
PULPROG  zgpg30
TD       65536
SOLVENT  CDCl3
NS       8
DS       0
SWH      32679.738 Hz
FIDRES   0.458653 Hz
AQ       1.0027661 sec
RG       4096
DW       15.300 usec
DE       6.00 usec
TE       296.3 K
D1       2.00000000 sec
d11      0.00000000 sec
MCREST   0.00000000 sec
MCWRK    0.01500000 sec

===== CHANNEL f1 =====
NUC1      13C
P1        5.50 usec
PL1       0.00 dB
SFO1      125.8231939 MHz

===== CHANNEL f2 =====
CPDPRG2  Waltz16
NUC2      1H
PCPD2    100.00 usec
PL2      0.00 dB
PL12     1.10 dB
SFO2     500.3320013 MHz

F2 - Processing parameters
SI        65536
SF        125.8081123 MHz
WDW       EM
SSB       0
LB        1.00 Hz
GB        0
PC        1.40
    
```

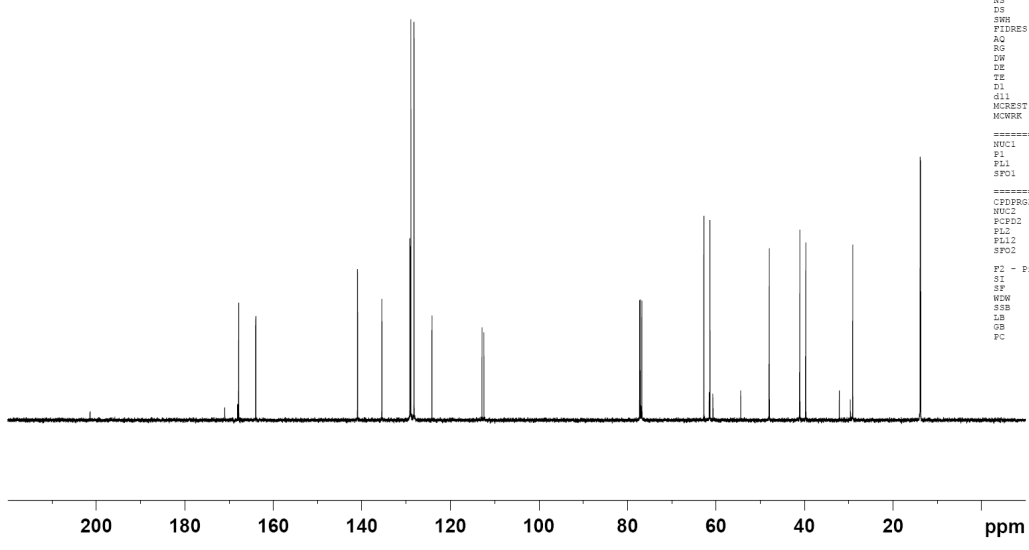

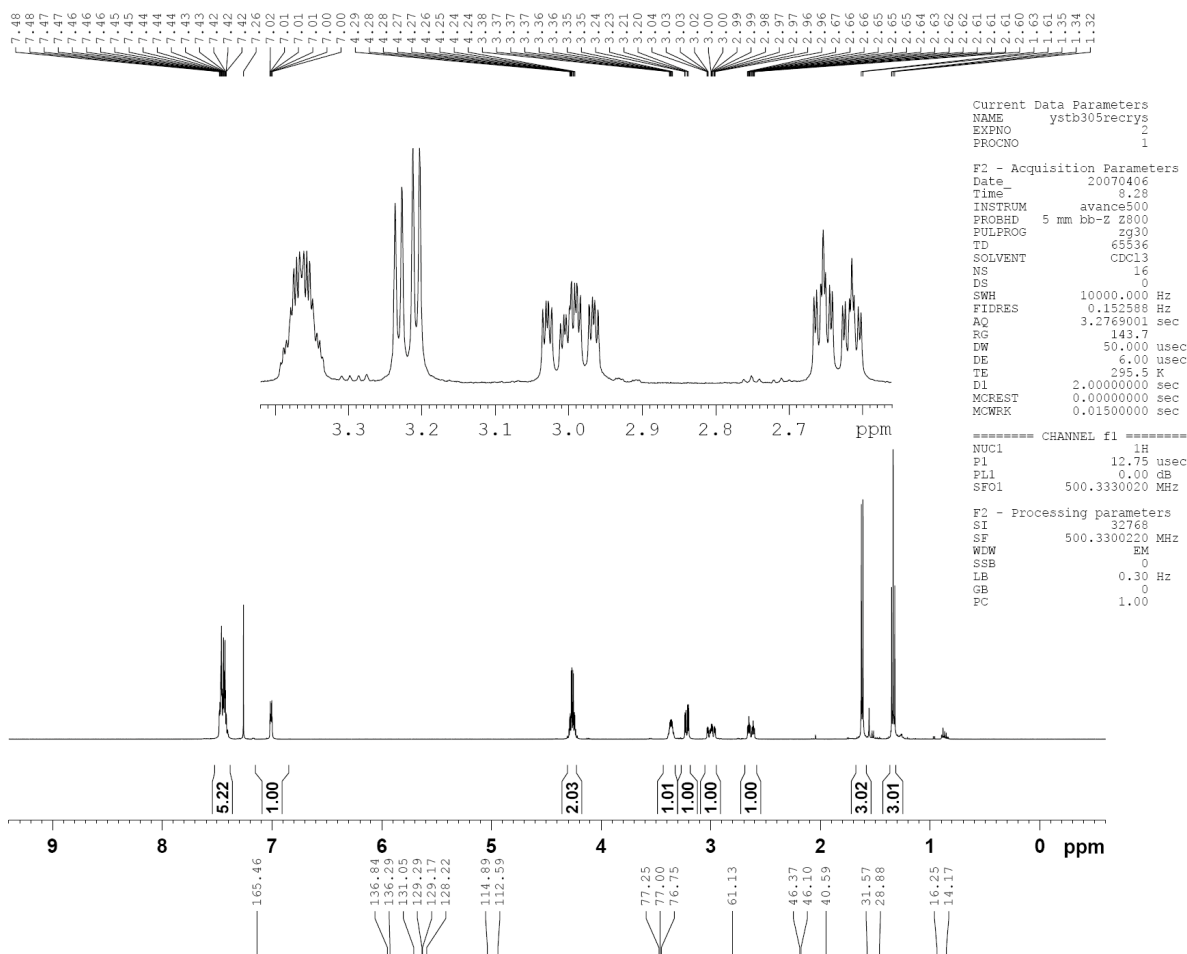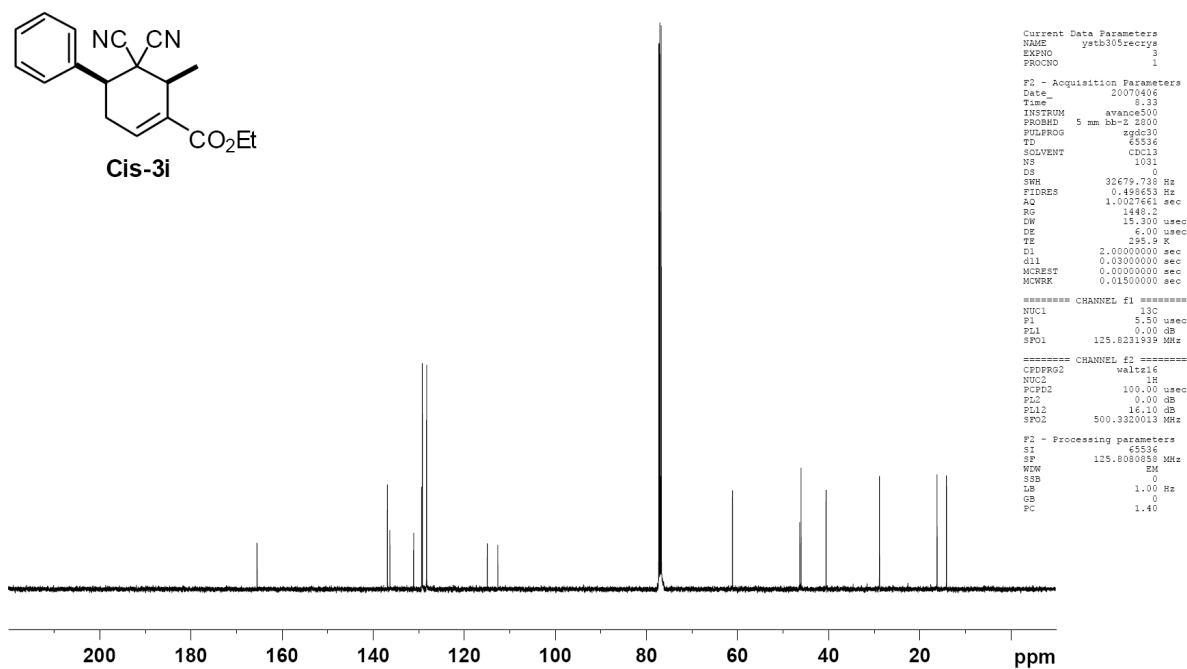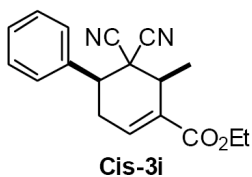

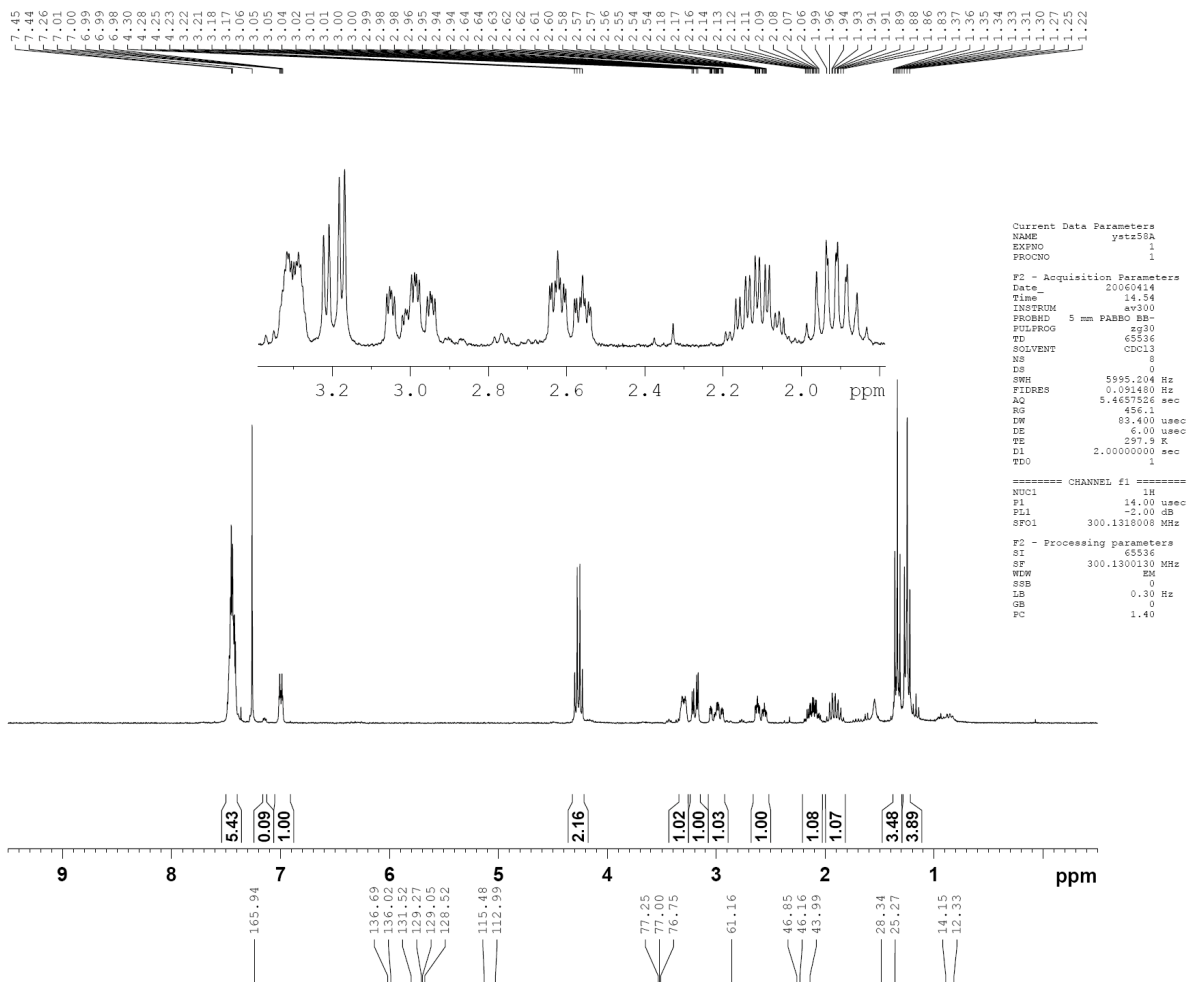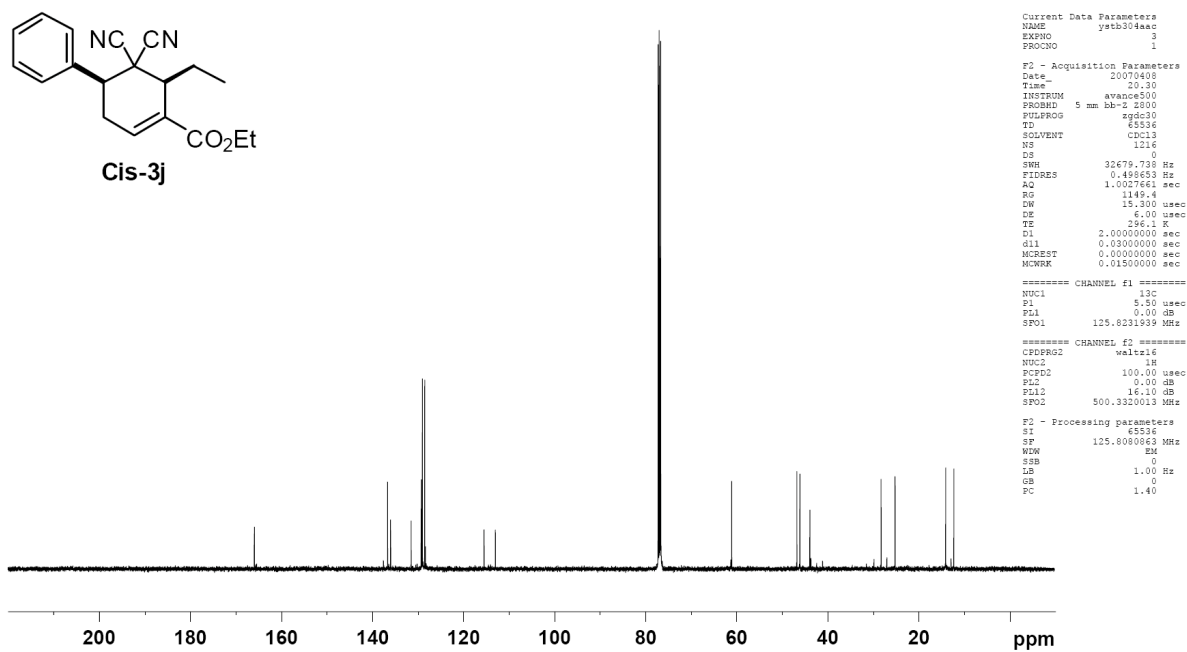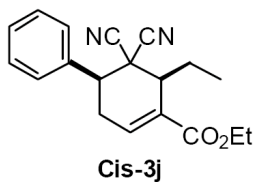



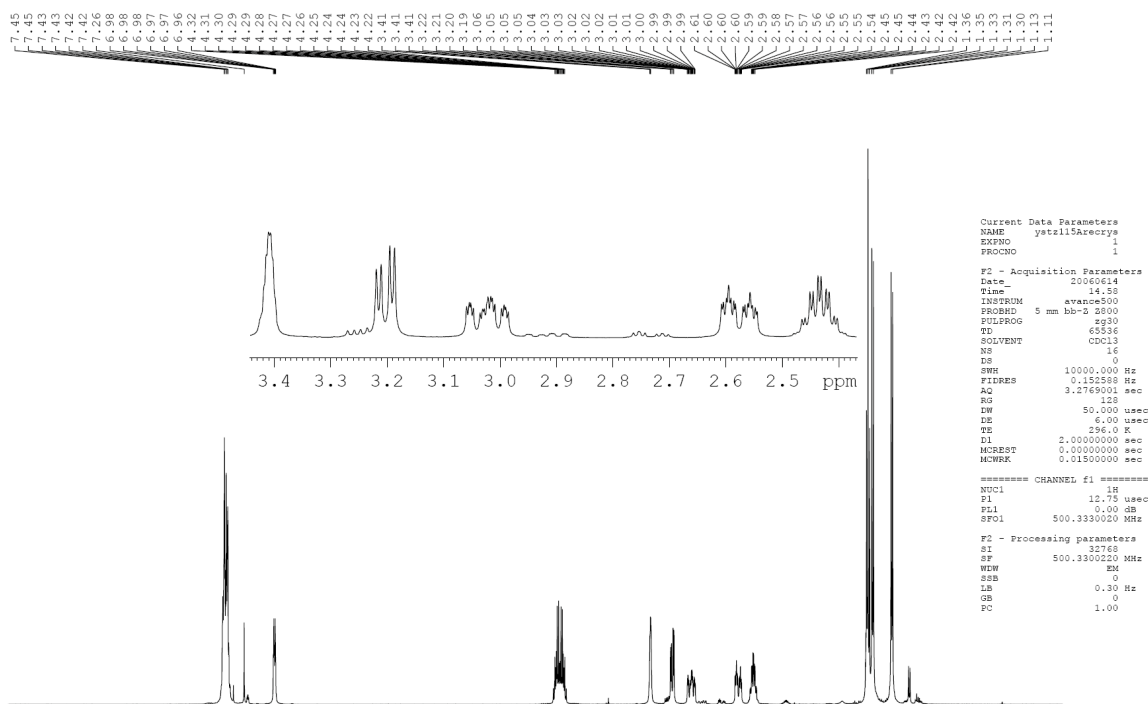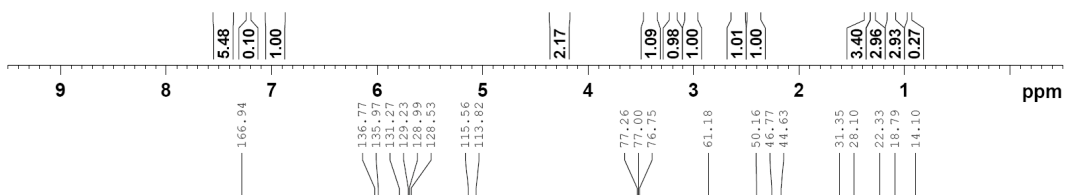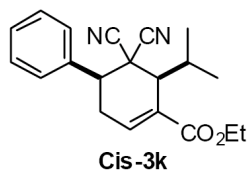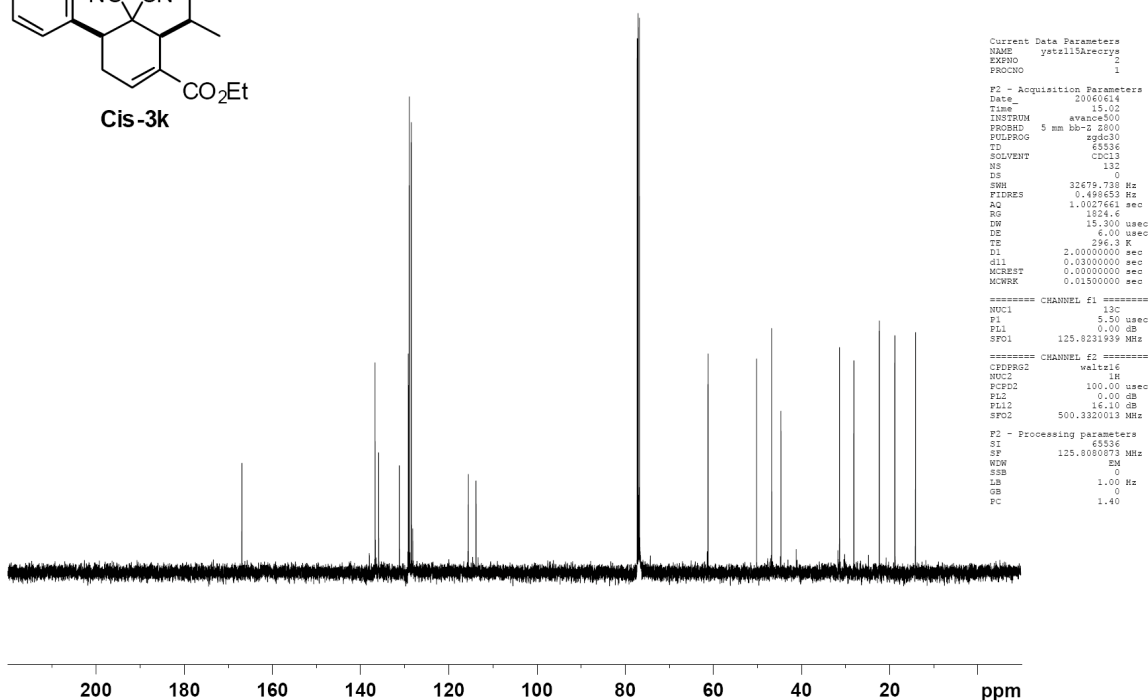

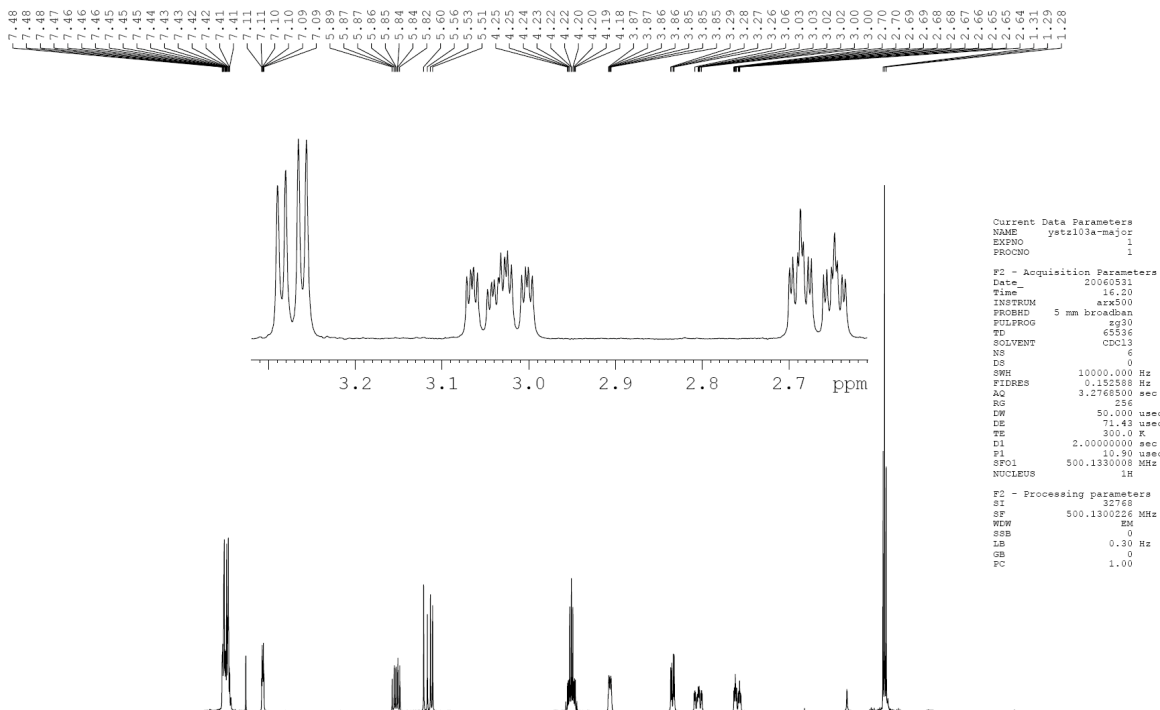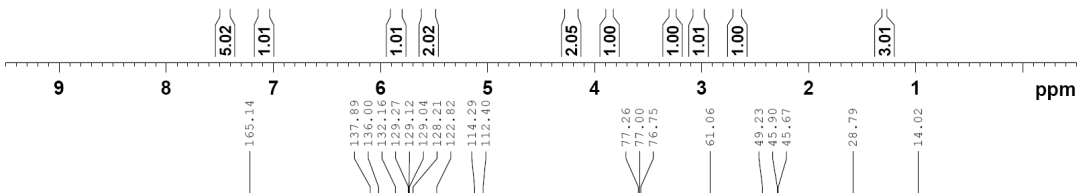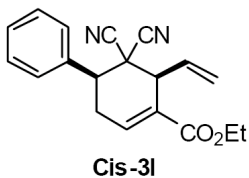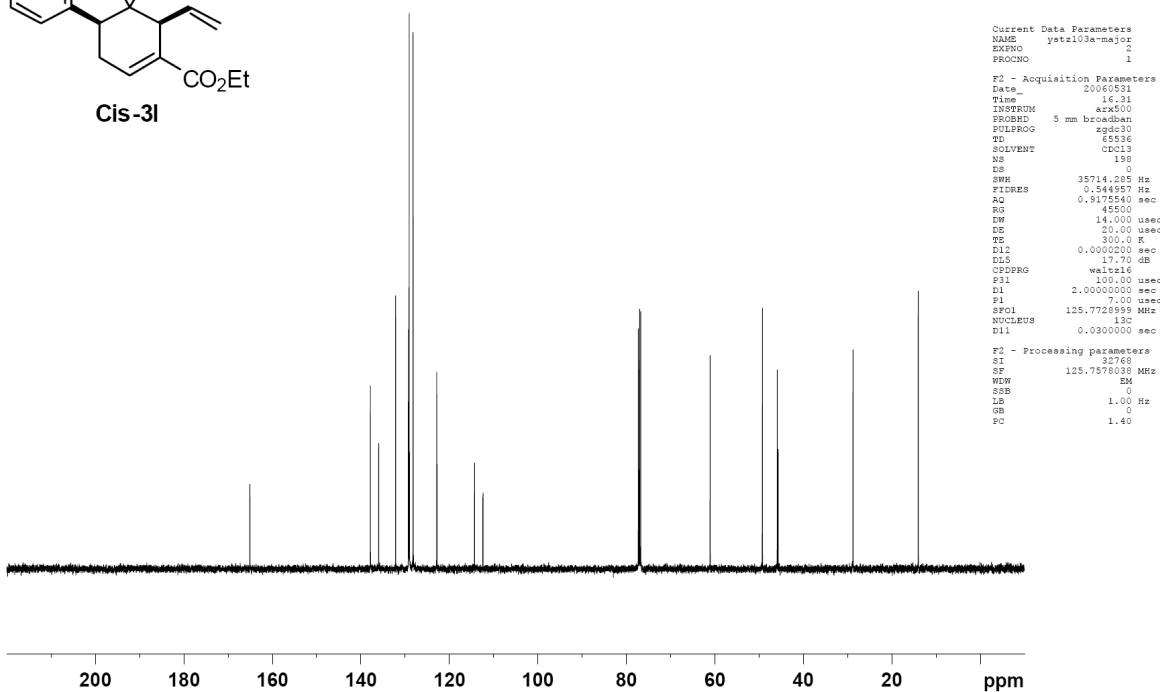

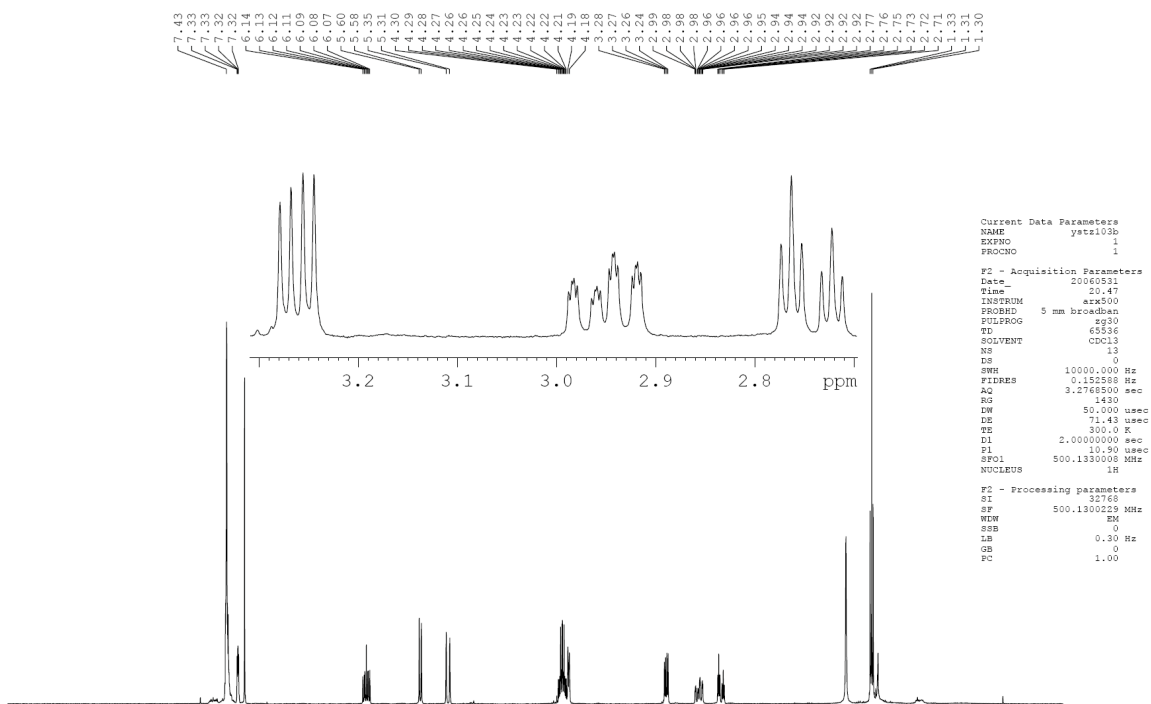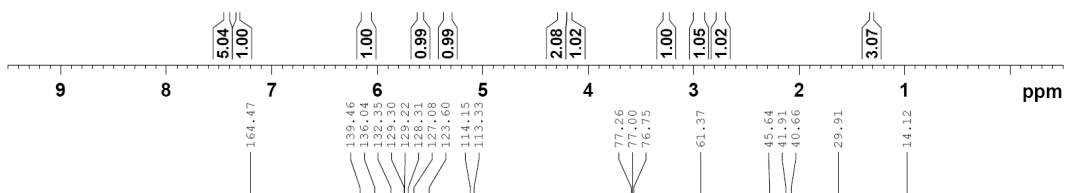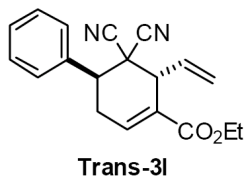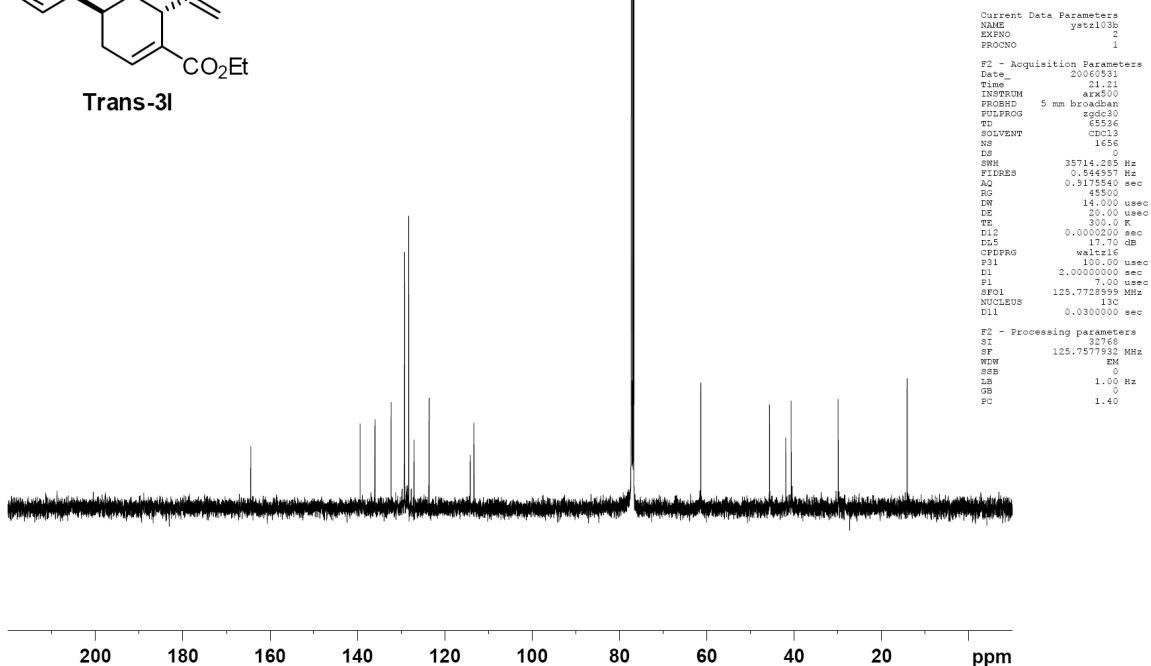

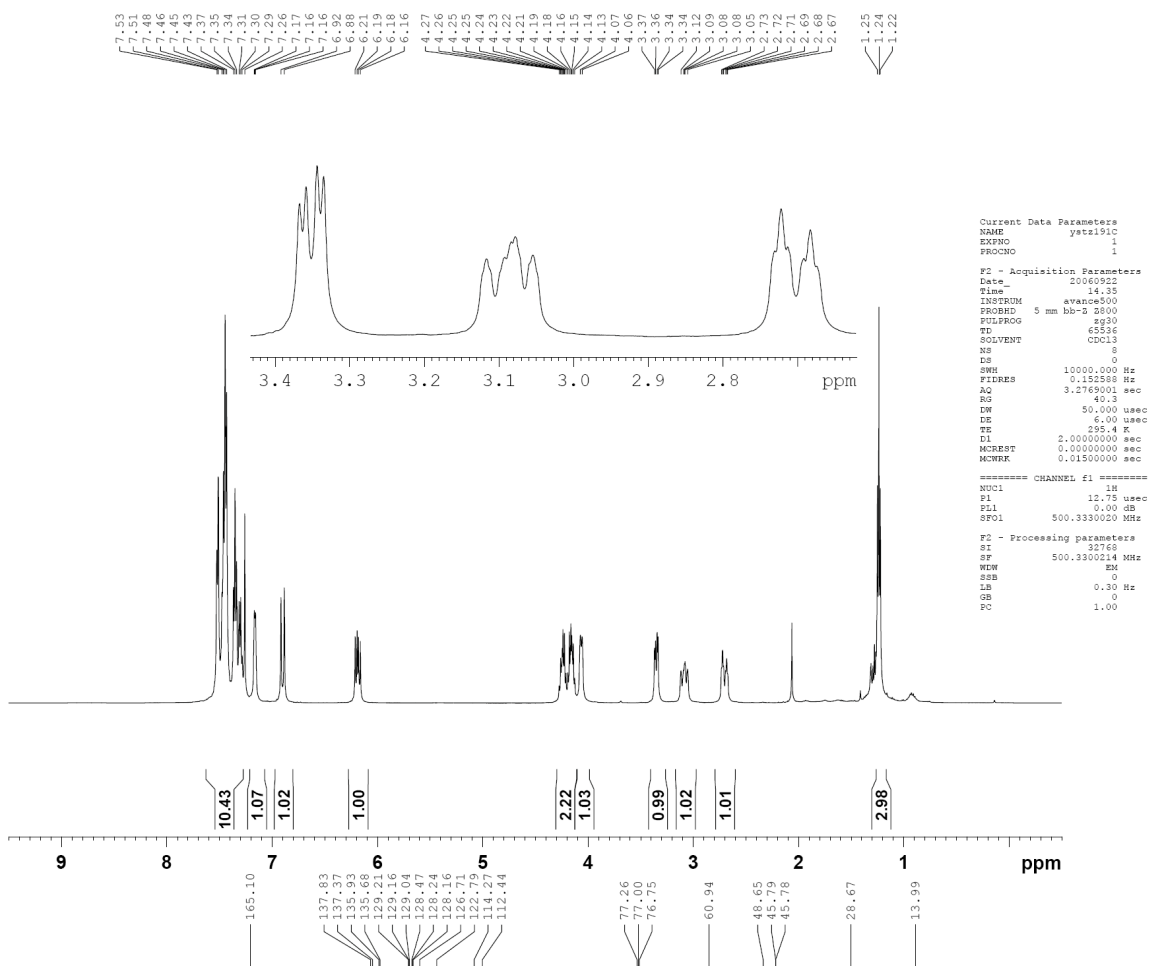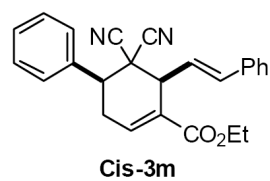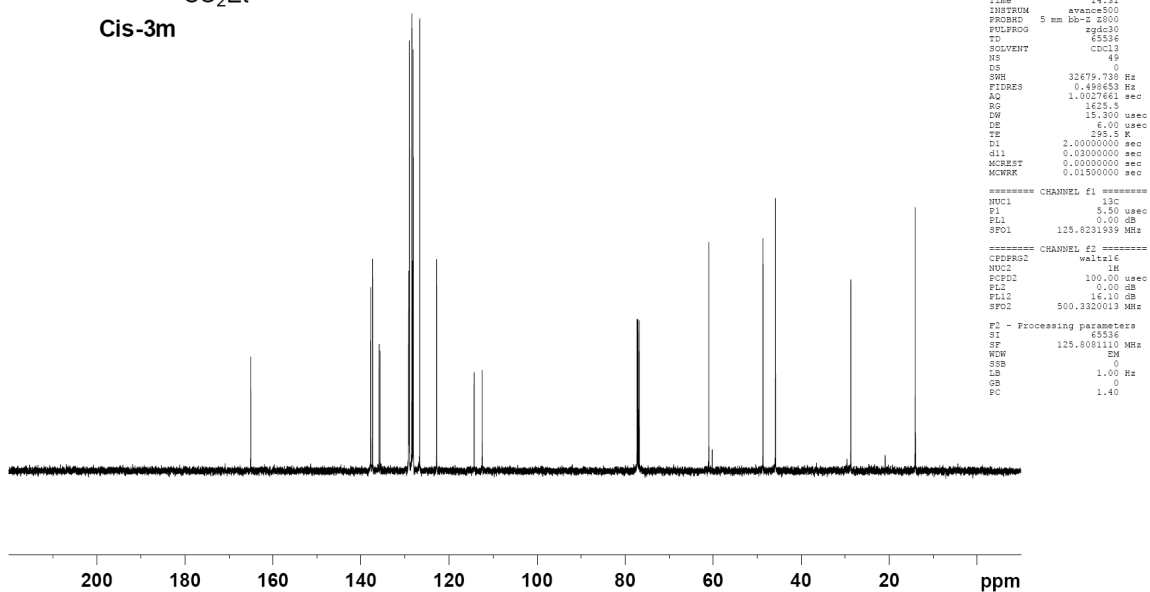

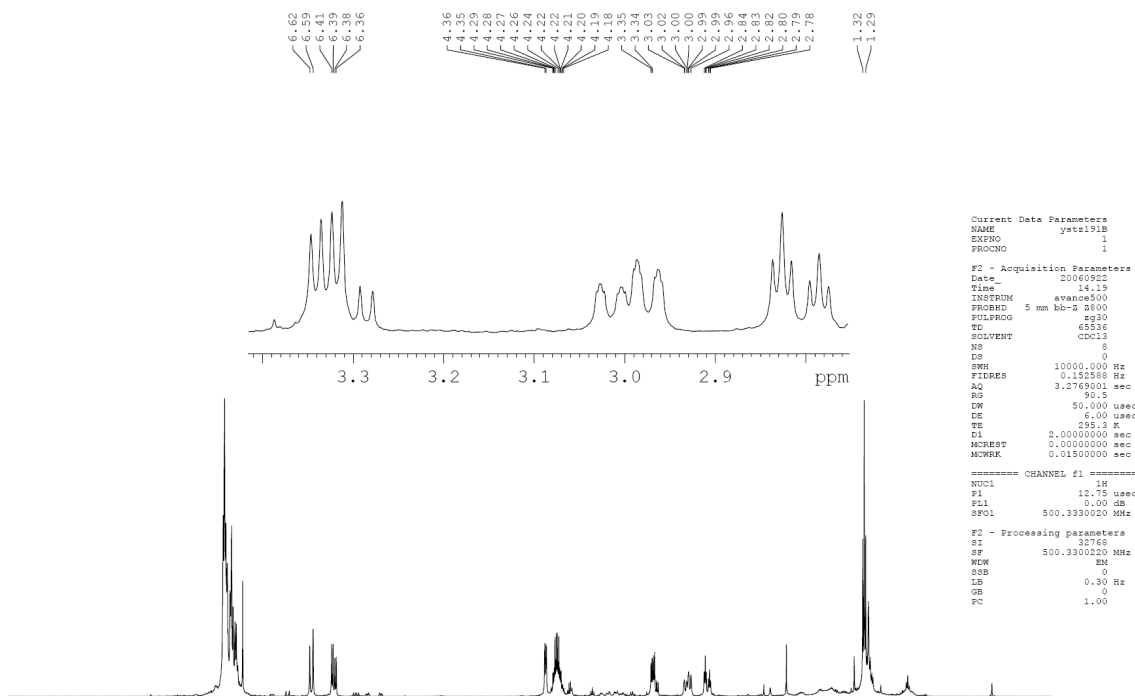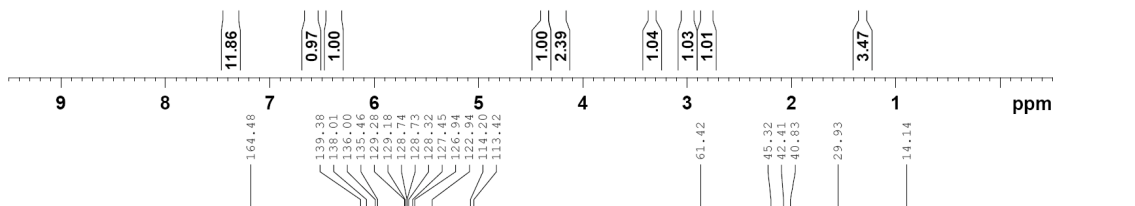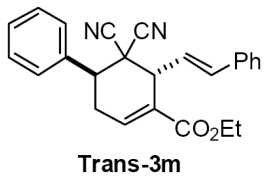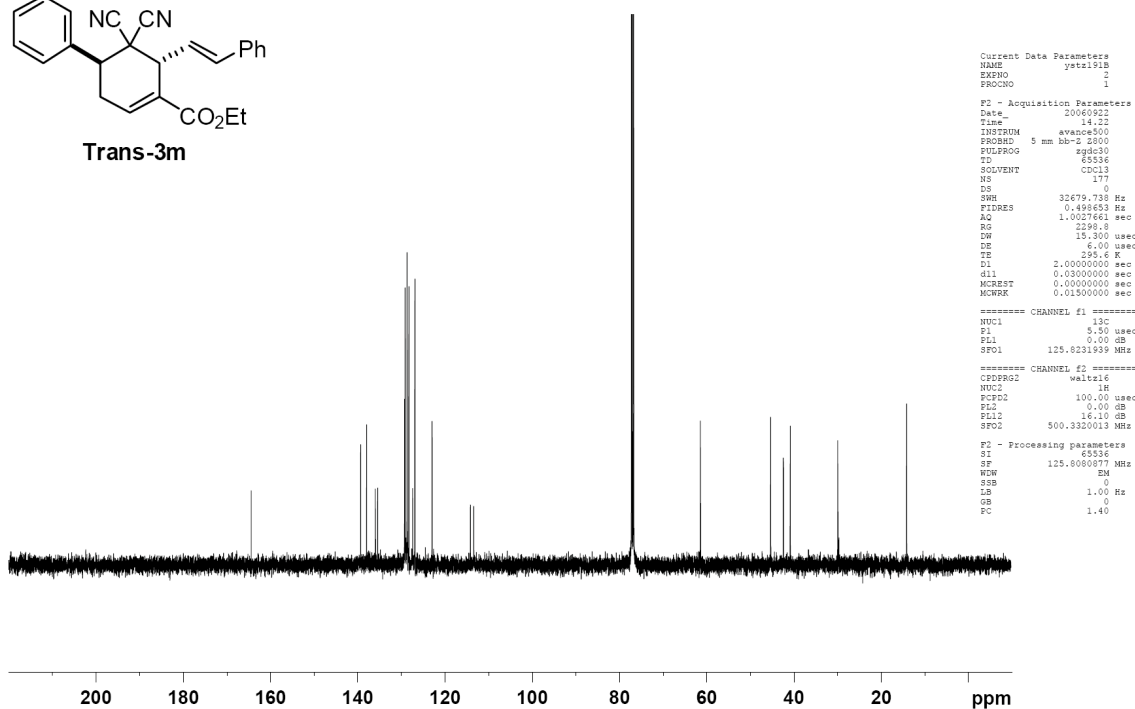

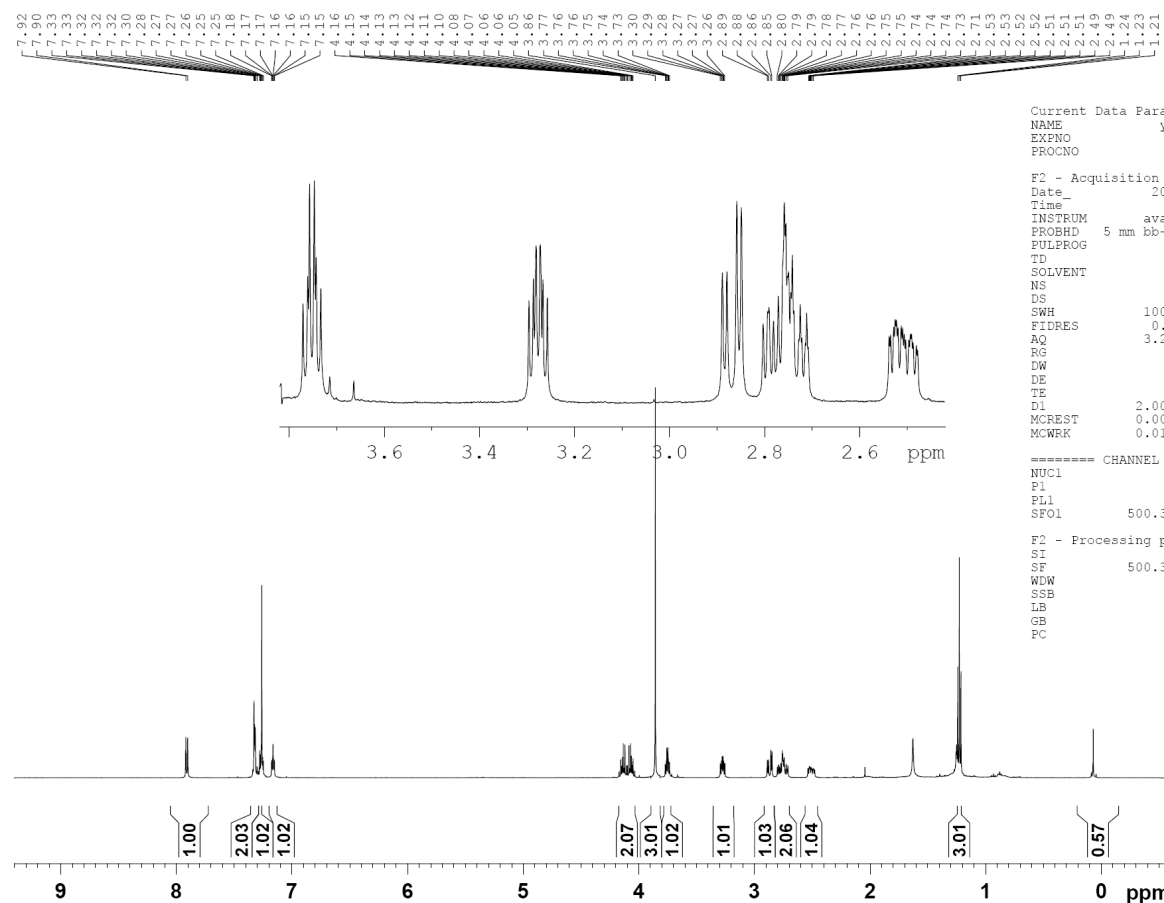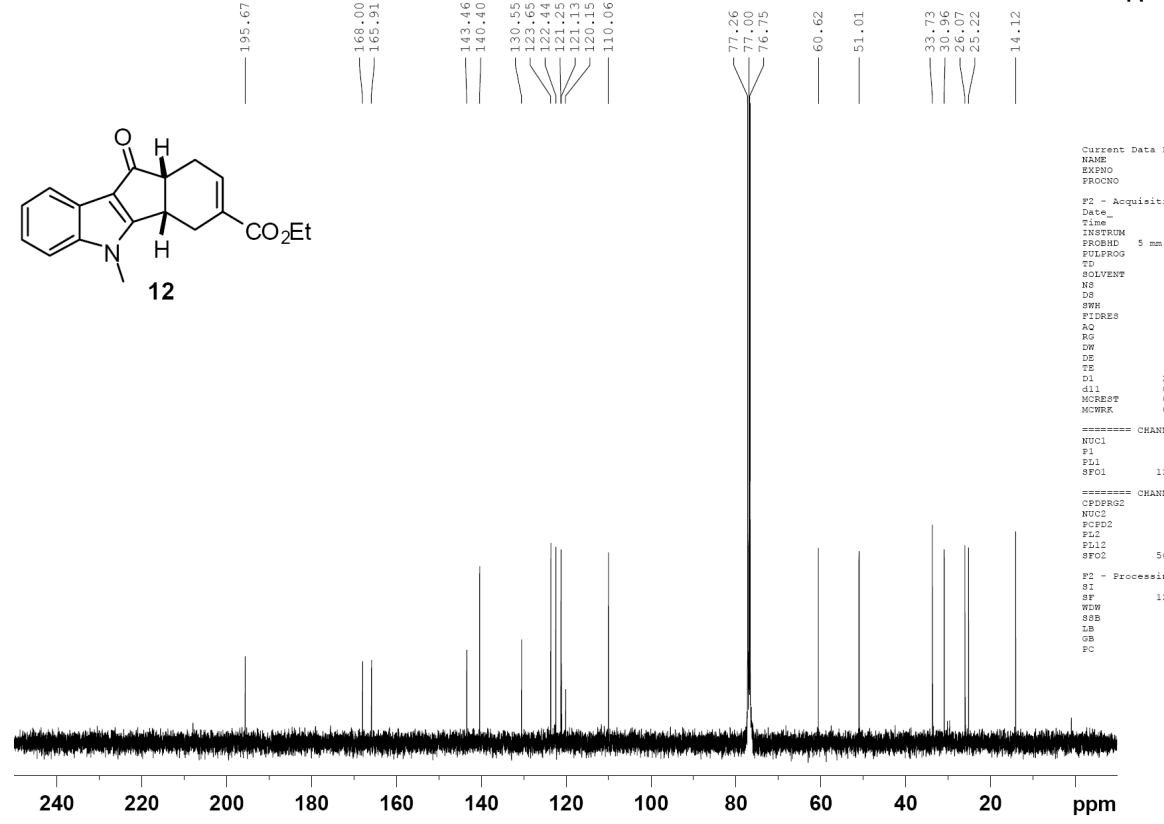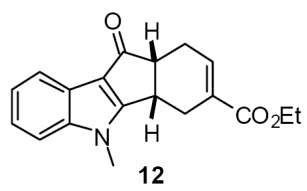

## 8. ORTEP Representations of the Solid State Structures of Compounds 3d, 4f, and 12

Crystallographic data for **3d**, **4f**, and **12** have been deposited with the Cambridge Crystallographic Data Centre as supplementary numbers CCDC-653533, -653534, and -653535. These data can be obtained online free of charge [or from the Cambridge Crystallographic Data Center, 12, Union Road, Cambridge CB2 1EZ, UK; fax: (+44) 1223-336-033; or [deposit@ccdc.cam.ac.uk](mailto:deposit@ccdc.cam.ac.uk)].

### A. Cyclohexene 3d

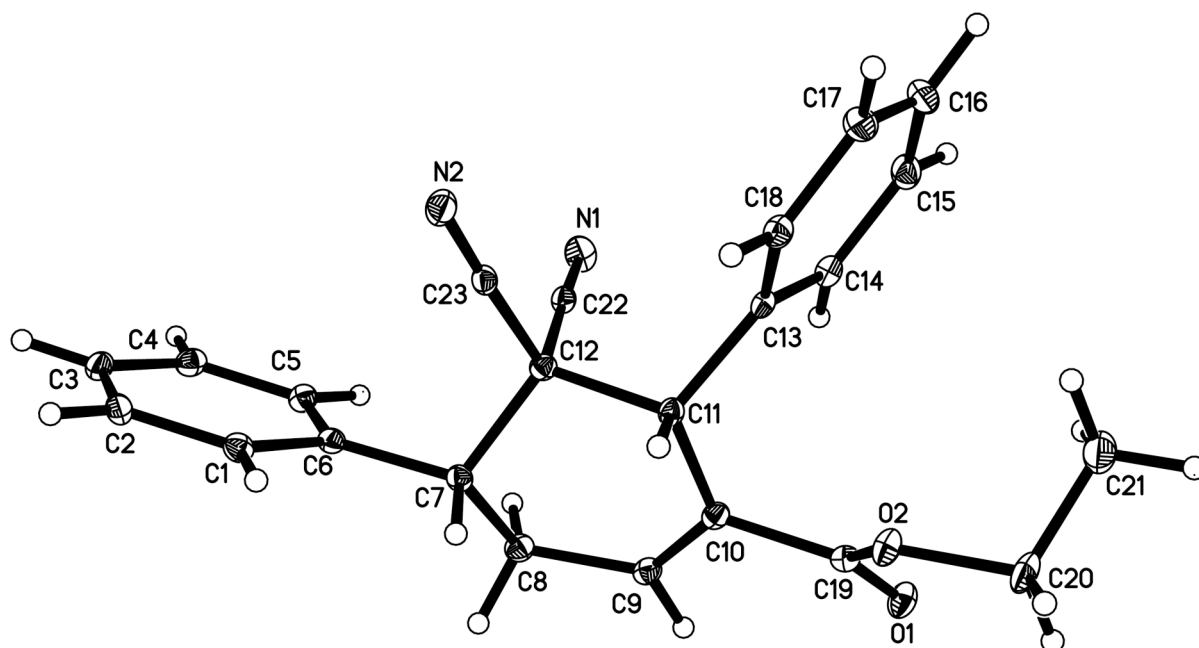

**B. Cyclohexene 4f**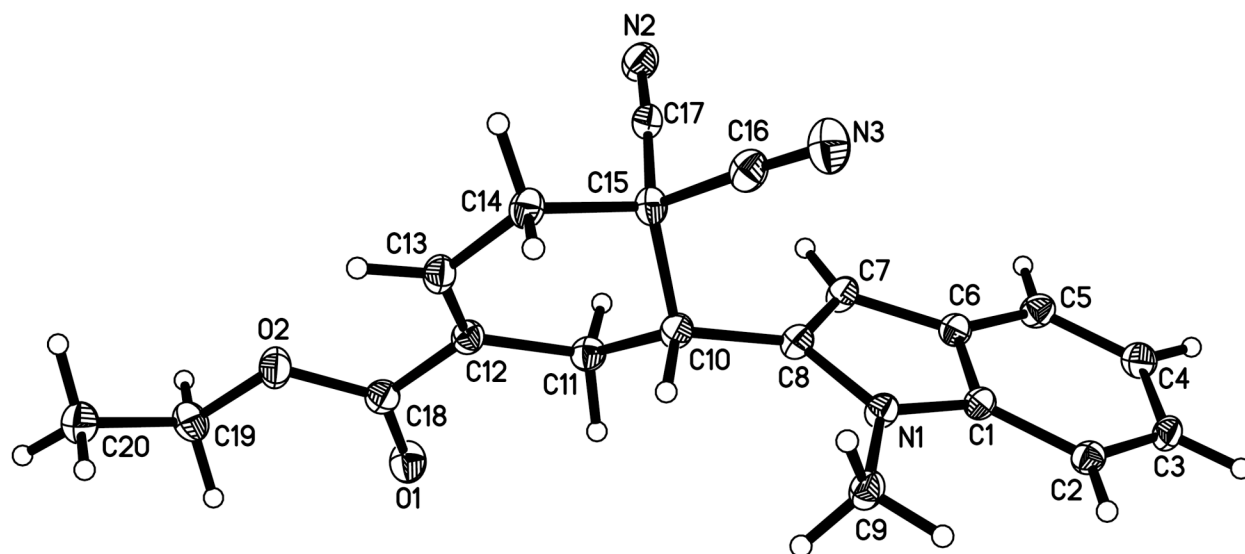**C. Tetracycle 12**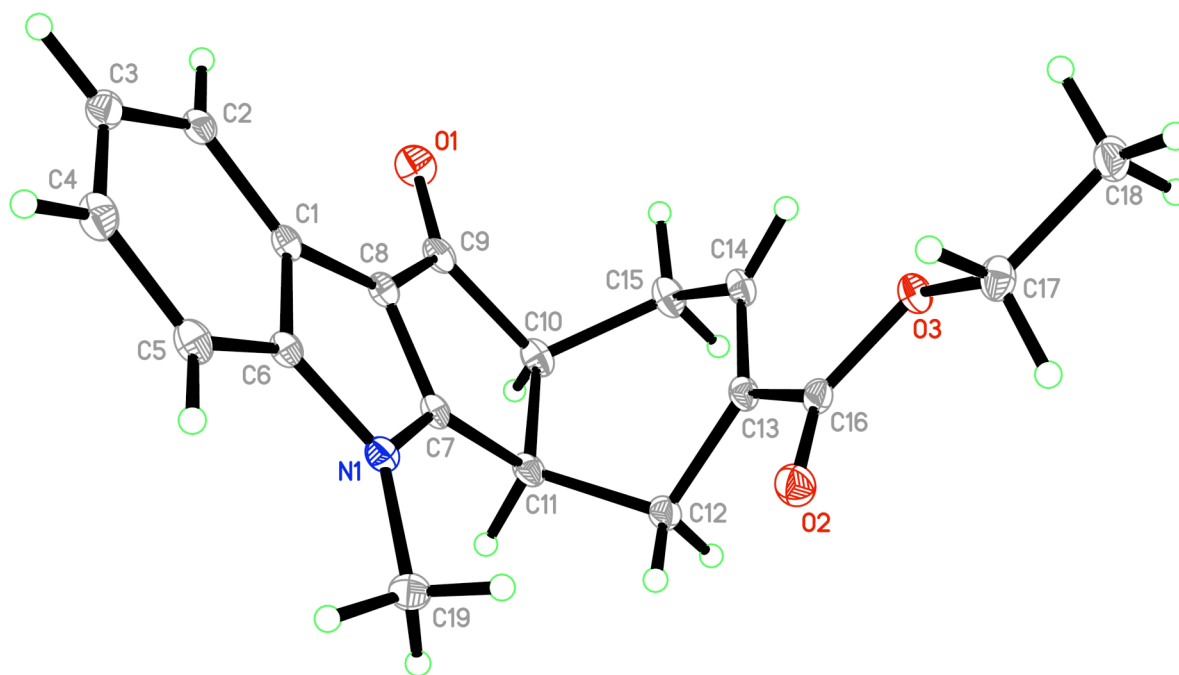

Supplement: NIHMS64151-supplement-4si20070712_09.pdf [file NIHMS64151-supplement-4si20070712_09.pdf]
